# Supplementary material for: Mineral nutrient variability of potato (Solanum tuberosum L.) tubers with different colors grown in Niksar, Kazova and Artova locations of Tokat Province, Turkey
Source: PeerJ. 2023 Jun 9;11:e15262. doi: 10.7717/peerj.15262 (PMC10259439; doi:10.7717/peerj.15262)
Supplement: Data S1 — K (mg/kg): Potassium; P: Phosphorus; Ca: Calcium; Mg; Magnesium; Fe: Iron; Zn: Zinc; Cu: Cupper; Mn: Manganese; Color Code: 1: light yelley; Color Code 2: Dark yellow; Color Code 3: Cream; Color Code 4: White Location Code 1:Niksar; Location Code 2:Kazova; Location Code 3: Artova [file peerj-11-15262-s001.xlsx]

## Sheet: All Data
Clone No	Rep	Year	Loc.	Color Code	COLOR	K g/ kg	P g/kg	Ca g/kg	Mg g/kg	Fe mg/kg	Zn mg/kg	Cu mg/kg	Mn mg/kg
A3/116	1	2013	1	3	cream	29.0164	2.39652	0.261066	0.668033	23.2582	24.0328	6.45492	6.30328
A3/116	2	2013	1	3	cream	34.9089	3.07386	0.230724	0.815608	20.4909	31.9055	5.71147	7.97637
A3/116	3	2013	1	3	cream	30.5873	3.65824	0.20354	0.96527	18.44	28.24	7.55	6.52
A3/116	1	2014	1	3	cream	15.7463	3.39951	0.304976	0.761073	31.3171	26.1463	5.07317	5.56098
A3/116	2	2014	1	3	cream	13.8635	2.9863	0.316544	0.63947	27	30.309	5.793	4.436
A3/116	3	2014	1	3	cream	15.2952	3.15809	0.433714	0.671714	32.762	32.19	6	5.905
A3/116	1	2013	2	3	cream	30.7354	3.15958	0.46083	1.44082	14.8074	19.3497	6.03	6.4032
A3/116	2	2013	2	3	cream	43.3233	3.72791	0.38253	1.34839	17.1687	25.8193	7.35	7.73092
A3/116	3	2013	2	3	cream	37.213	3.51579	0.429474	1.23108	14.4361	22.8346	8.31	6.51629
A3/116	1	2014	2	3	cream	10.1287	3.00594	0.202376	0.90099	51.4851	27.3267	8.0198	6.83168
A3/116	2	2014	2	3	cream	12.4583	3.32567	0.18932	1.08527	48.55	24.87	8.55	6.87
A3/116	3	2014	2	3	cream	15.2168	3.56705	0.25427	1.14728	44.01	21.08	9.05	7.12
A3/116	1	2013	3	3	cream	31.0143	4.24283	0.308607	1.32787	33.1967	18.6475	7.27459	9.11885
A3/116	2	2013	3	3	cream	27.6935	3.90779	0.338078	1.4626	26.6883	14.8571	6.75325	8.50649
A3/116	3	2013	3	3	cream	25.6153	4.00703	0.325013	1.59719	25.0126	21.5419	8.03616	9.6434
A3/116	1	2014	3	3	cream	16.1999	3.48936	0.625532	1.40327	33.7872	32.5581	5.83869	6.8283
A3/116	2	2014	3	3	cream	15.3694	3.38294	0.613287	1.24046	32.9202	37.1839	7.93257	7.33763
A3/116	3	2014	3	3	1	18.6441	3.89443	0.664019	1.2	38.1356	33.1235	8.46	7.74818
A4/9	1	2013	1	3	cream	37.9413	2.07537	0.241943	1.03867	14.8148	45.3968	6.34921	6.15681
A4/9	2	2013	1	3	cream	36.5998	1.61986	0.279639	1.18556	17.3521	42.327	5.01505	7.42227
A4/9	3	2013	1	3	cream	38.7067	1.86497	0.342464	1.12831	18.0244	44.7047	7.16	5.49898
A4/9	1	2014	1	3	cream	14.9637	3.00823	0.331622	1.14964	23.995	19.177	7.65	8.266
A4/9	2	2014	1	3	cream	17.4988	2.63694	0.375948	1.31653	21.7159	19.1953	5.42899	7.07707
A4/9	3	2014	1	3	cream	19.8743	2.78521	0.31588	1.25432	28.23	21.54	8.67	8.55
A4/9	1	2013	2	3	cream	27.4078	3.01719	0.224364	1.0774	12.4675	23.0649	10.5974	7.58442
A4/9	2	2013	2	3	cream	35.3926	3.72831	0.304959	1.42149	21.9008	32.1281	9.09091	8.05785
A4/9	3	2013	2	3	cream	32.145	3.41527	0.25836	1.25494	18.03	27.34	8.55	7.83
A4/9	1	2014	2	3	cream	19.31	3.98814	0.380952	1.38484	50.0486	32.1108	12.1477	9.71817
A4/9	2	2014	2	3	cream	18.0509	3.39126	0.402808	1.21075	49.3663	25.252	10.1776	9.50552
A4/9	3	2014	2	3	cream	14.2651	3.64819	0.321446	1.48096	55.4217	29.1807	10.7952	8.90361
A4/9	1	2013	3	3	cream	21.4927	3.39491	0.194483	1.11145	21.9869	23.6157	8.2703	6.95915
A4/9	2	2013	3	3	cream	22.0542	3.03219	0.242974	1.38682	17.0669	26.1625	9.50434	8.48237
A4/9	3	2013	3	3	cream	24.8116	3.59807	0.235942	1.28647	22.3188	27.1498	9.75845	7.60386
A4/9	1	2014	3	3	cream	19.7077	4.11495	0.248563	1.4077	52.2163	29.0307	12.4696	8.67024
A4/9	2	2014	3	3	cream	19.206	4.1598	0.294541	1.44119	55.7816	28.3871	12.1092	9.03226
A4/9	3	2014	3	3	cream	20.6295	4.1278	0.365093	1.42966	50.6438	22.7945	12.494	8.77444
T5/14	1	2013	1	3	cream	33.2582	2.54721	0.28525	1.12436	17.35	22.54	7.99	8.55
T5/14	2	2013	1	3	cream	30.2581	2.78521	0.24736	1.20587	13.55	22.17	8.55	7.25
T5/14	3	2013	1	3	cream	34.053	2.25287	0.208326	1.01649	19.3903	20.87	9	7.3963
T5/14	1	2014	1	3	cream	11.9921	3.05818	0.283531	1.09763	15.178	13.215	10.848	9.862
T5/14	2	2014	1	3	cream	18.652	3.68929	0.278872	1.15488	13.2887	17.5813	9.68	8.79541
T5/14	3	2014	1	3	cream	16.9962	3.57102	0.352687	1.16123	15.8349	21.6065	8.74	7.86948
T5/14	1	2013	2	3	cream	42.4298	3.67957	0.266989	1.32333	7.55082	12.4879	7.26041	6.67957
T5/14	2	2013	2	3	cream	37.3985	3.33507	0.217274	1.13528	12.7992	24.0375	6.76379	7.90843
T5/14	3	2013	2	3	cream	35.4782	3.00455	0.25314	1.24731	10.25	18.57	6.99	7.54
T5/14	1	2014	2	3	cream	10.6557	3.32498	0.297975	1.05111	34.9662	27.2903	8.61	8.10029
T5/14	2	2014	2	3	cream	14.1603	2.76622	0.325763	1.21756	36.1641	24.8931	9.54198	7.34733
T5/14	3	2014	2	3	cream	13.9912	3.15955	0.255474	1.18213	30	26.3132	9.62199	7.95287
T5/14	1	2013	3	3	cream	22.3553	3.52934	0.264172	1.37705	20.1597	33.8323	7.48503	9.78044
T5/14	2	2013	3	3	cream	20.8114	3.1073	0.196349	1.47769	17.6471	30.2272	8.82353	7.09939
T5/14	3	2013	3	3	cream	25.8742	3.45821	0.23577	1.52831	21.73	28.58	9.24	8.74
T5/14	1	2014	3	3	cream	16.5649	3.45897	0.275382	1.30439	41.8893	28.8168	9.06489	7.82443
T5/14	2	2014	3	3	cream	16.826	3.50616	0.279251	1.33268	40.1183	30.1626	8.87137	7.88566
T5/14	3	2014	3	3	cream	16.0349	3.4348	0.291032	1.31459	35.2884	31.5075	8.62821	7.85264
A5/60	1	2013	1	3	cream	34.17	3.69565	0.139229	0.983498	23.3202	45.7905	10.4	5.43478
A5/60	2	2013	1	3	cream	46.5759	3.07198	0.179961	0.861187	20.2179	43.9689	11.965	7.10117
A5/60	3	2013	1	3	cream	39.8584	3.12942	0.164004	1.04651	23.2558	49.2417	11.4257	6.87563
A5/60	1	2014	1	3	cream	15.5209	2.61344	0.381207	0.824245	25.1801	27.3535	7.01071	6.62123
A5/60	2	2014	1	3	cream	10.8965	2.7261	0.39267	0.78633	25.6563	18.524	5.64636	6.73601
A5/60	3	2014	1	3	cream	13.4025	2.4079	0.248988	0.822716	26.469	20.568	6.17	7.296
A5/60	1	2013	2	3	cream	40.7194	3.85177	0.359068	1.17771	23.8095	25.9068	11.11	5.67376
A5/60	2	2013	2	3	cream	47.6325	4.01509	0.248814	1.27208	24.0333	27.7638	12.418	6.46138
A5/60	3	2013	2	3	cream	42.9336	4.13896	0.240556	1.39856	25.5121	30.8646	10.4992	6.64642
A5/60	1	2014	2	3	cream	14.1537	2.78307	0.196109	1.17607	42.3152	29.5331	9.21	8.56031
A5/60	2	2014	2	3	cream	11.7535	3.00234	0.225418	1.06068	37.8404	20.7358	8.69565	8.49785
A5/60	3	2014	2	3	cream	12.6517	2.98963	0.22182	1.27006	35.7339	23.5812	7.63209	9.00196
A5/60	1	2013	3	3	cream	20.8136	3.55738	0.226634	1.30993	23.5351	25.0847	7.26392	7.16707
A5/60	2	2013	3	3	cream	22.3139	3.25553	0.210664	1.27767	15.3924	21.328	7.84708	6.74044
A5/60	3	2013	3	3	cream	25.8741	3.32574	0.2013	1.45802	18.57	28.54	8.27	7.029
A5/60	1	2014	3	3	cream	17.5012	3.41792	0.313317	1.39855	32.8329	35.8354	10.63	9.49153
A5/60	2	2014	3	3	cream	17.3109	3.20188	0.427286	1.42462	32.2294	39.2486	8.09	9.39199
A5/60	3	2014	3	3	cream	13.8805	3.08975	0.348276	1.2627	30.1977	30.8839	9.14	9.18796
A5/98	1	2013	1	3	cream	37.557	3.01277	0.387836	1.45058	20.8819	33.2489	8.00811	6.21085
A5/98	2	2013	1	3	cream	39.5	2.8997	0.4855	1.437	29.8	34.3	7.2	5.5
A5/98	3	2013	1	3	cream	33.4051	3.10811	0.460441	1.37777	26.8252	31.8478	8.51277	6.00901
A5/98	1	2014	1	3	cream	19.3879	3.10128	0.321432	1.02894	32.359	10.7896	3.13879	7.57185
A5/98	2	2014	1	3	cream	12.7502	2.94305	0.352478	1.29252	29.38	23.207	5.53936	9.13508
A5/98	3	2014	1	3	cream	19.2988	3.3037	0.339309	1.19654	36.284	16.79	4.506	8.556
A5/98	1	2013	2	3	cream	41.0452	3.39219	0.407509	1.0624	16.4384	28.6149	8.11771	5.47945
A5/98	2	2013	2	3	cream	39.896	3.14769	0.485699	1.27405	13.5777	18.8248	7.80031	6.96828
A5/98	3	2013	2	3	cream	39.995	3.06459	0.408538	1.2225	13.3601	20.5826	6.42893	7.13209
A5/98	1	2014	2	3	cream	17.2035	2.77088	0.499904	1.75217	50.7907	31.6972	7.75024	10.2218
A5/98	2	2014	2	3	cream	14.2609	2.89469	0.474493	1.5256	51.7391	34.3961	9.08213	9.75845
A5/98	3	2014	2	3	cream	13.8913	3.00411	0.464366	1.69515	52.5698	35.1444	8.61478	8.51689
A5/98	1	2013	3	3	cream	20.1185	3.1842	0.2532	1.48642	21.7284	30.0247	5.4321	8.09877
A5/98	2	2013	3	3	cream	22.5473	3.31408	0.25832	1.32536	24.87	28.54	6.55	8.55
A5/98	3	2013	3	3	cream	25.487	3.48714	0.30225	1.39874	28.01	32.65	5.89	7.99
A5/98	1	2014	3	3	cream	18.7846	3.79096	0.462907	1.78901	36.5581	30.9188	10.598	10.5007
A5/98	2	2014	3	3	cream	18.6812	3.71145	0.486168	1.74616	45.5131	31.2345	9.81656	10.114
A5/98	3	2014	3	3	cream	20.0585	3.57582	0.498391	1.76792	48.8542	30.8142	8.58118	9.75134
A6/76	1	2013	1	3	cream	43.7475	1.91507	0.234929	0.888595	12.3218	25.5601	5.80448	4.58248
A6/76	2	2013	1	3	cream	33.659	2.01018	0.250865	0.9657	13.8931	28.5496	8.54962	5.59796
A6/76	3	2013	1	3	cream	38.2468	2.46719	0.329775	0.869442	14.9853	23.2125	6.56219	5.19099
A6/76	1	2014	1	3	cream	8.77401	2.58487	0.311833	0.785839	16.6828	12.7061	4.8128	5.04365
A6/76	2	2014	1	3	cream	10.0865	3.09423	0.290865	0.975962	19.4423	15.0577	5.67308	4.80769
A6/76	3	2014	1	3	cream	7.84349	2.87081	0.323956	0.669419	21.315	9.121	7.489	4.801
A6/76	1	2013	2	3	cream	44.4811	4.05141	0.243356	1.12706	11.3482	18.0407	8.9852	5.43162
A6/76	2	2013	2	3	cream	43.7262	3.91883	0.216724	1.29487	8.01956	18.4841	9.19315	7.23716
A6/76	3	2013	2	3	cream	40.5822	3.87427	0.23633	1.02439	13.54	20.35	7.25	6.25
A6/76	1	2014	2	3	cream	16.7058	3.43109	0.262561	1.25494	38.7097	20.5279	11.828	9.77517
A6/76	2	2014	2	3	cream	11.7936	3.72555	0.300289	1.12343	30.8582	20.2507	9.58	7.13597
A6/76	3	2014	2	3	cream	21.3559	4.08523	0.329492	1.19709	33.1695	25.3511	10.1124	8.523
A6/76	1	2013	3	3	cream	22.5678	2.87265	0.402923	1.3904	30.2067	22.0251	6.15866	5.9499
A6/76	2	2013	3	3	cream	17.0869	2.97612	0.345081	1.27889	38.1089	23.6867	6.1127	5.73066
A6/76	3	2013	3	3	cream	20.2581	3.21474	0.35833	1.12539	36.14	26.32	7.254	6.08
A6/76	1	2014	3	3	cream	19.4048	3.10218	0.31369	1.47321	31.9444	39.9841	8.03571	8.33333
A6/76	2	2014	3	3	cream	18.2495	3.22824	0.301934	1.53772	27.176	42.2631	8.51064	8.41393
A6/76	3	2014	3	3	cream	18.8423	3.19826	0.328799	1.46937	29.4766	35.1182	9.13025	8.68307
A7/12	1	2013	1	3	cream	43.3026	3.85569	0.119077	0.826872	17.0256	28.1795	5.33333	6.30769
A7/12	2	2013	1	3	cream	49.2551	4.00408	0.114796	0.907959	14.2857	33.1633	6.53061	6.22449
A7/12	3	2013	1	3	cream	40.1735	3.68367	0.152755	0.926122	18.0612	38.0612	7.2449	6.12245
A7/12	1	2014	1	3	cream	11.6795	2.27831	0.234933	0.744722	14.587	33.628	11.036	4.319
A7/12	2	2014	1	3	cream	14.1416	2.06014	0.179631	0.840252	8.82638	35.7759	9.16392	4.46169
A7/12	3	2014	1	3	cream	15.3216	2.64412	0.149976	0.966174	12.0691	40.0191	10.767	5.09909
A7/12	1	2013	2	3	cream	37.2601	3.55589	0.140257	1.09308	13.8912	40.1583	8.82493	6.83581
A7/12	2	2013	2	3	cream	34.8404	3.40474	0.161895	1.29557	15.345	42.9454	9.78373	8.85685
A7/12	3	2013	2	3	cream	43.2724	3.91453	0.168431	1.18094	17.334	43.0991	9.43215	7.21848
A7/12	1	2014	2	3	cream	11.7551	2.19608	0.260067	0.72176	26.3381	19.5122	6.50407	5.35629
A7/12	2	2014	2	3	cream	13.3136	2.33973	0.201871	0.813885	34.4658	18.3161	7.18858	6.20384
A7/12	3	2014	2	3	cream	19.0268	2.6219	0.266618	0.96618	30.0292	21.8978	8.02433	6.05109
A7/12	1	2013	3	3	cream	19.0733	3.22301	0.280652	1.23116	22.5051	24.9593	9.16497	5.73931
A7/12	2	2013	3	3	cream	21.0733	3.05798	0.342405	1.05414	26.7034	33.9243	7.25827	5.55822
A7/12	3	2013	3	3	cream	17.8765	2.74074	0.386173	1.28395	28	29.2346	6.51852	5.4321
A7/12	1	2014	3	3	cream	24.1453	2.57421	0.29836	1.02532	25.65	28.56	8.55	6.02
A7/12	2	2014	3	3	cream	28.7422	2.65425	0.26322	0.98736	28.99	24.98	7.25	5.98
A7/12	3	2014	3	3	cream	22.587	2.95871	0.31522	1.17434	30.02	30.02	8.64	6.55
A10/15	1	2013	1	3	cream	49.6318	4.98282	0.427295	1.47275	14.9239	45.2626	7.95287	5.79283
A10/15	2	2013	1	3	cream	44.6307	4.49002	0.420359	1.33872	14.3713	38.523	6.68663	5.48902
A10/15	3	2013	1	3	cream	45.8959	4.08148	0.348348	1.51451	15.9159	40.8438	9.60961	6.50651
A10/15	1	2014	1	3	cream	19.5749	3.37874	0.310338	1.0657	28.357	23.575	12.754	9.179
A10/15	2	2014	1	3	cream	15.2599	2.97568	0.302337	1.10348	27.659	15.928	11.448	9.919
A10/15	3	2014	1	3	cream	11.2463	3.04154	0.267755	0.978734	22.552	11.474	10.584	8.023
A10/15	1	2013	2	3	cream	35.5015	3.4429	0.288878	1.40348	17.7756	28.7289	10.3277	6.85204
A10/15	2	2013	2	3	cream	38.1159	3.67081	0.338509	1.32609	19.6605	19.0476	9.14286	6.00414
A10/15	3	2013	2	3	cream	38.7932	3.5869	0.294482	1.27282	21.7638	23.0191	12.1712	6.18876
A10/15	1	2014	2	3	cream	13.3366	2.95347	0.367327	1.13663	32.2772	24.1584	12.0792	8.51485
A10/15	2	2014	2	3	cream	20.7361	3.087	0.319885	1.5153	39.5029	23.805	10.8031	9.84704
A10/15	3	2014	2	3	cream	18.5742	3.34527	0.38725	1.32578	36.22	20.58	11.24	7.587
A10/15	1	2013	3	3	cream	23.0724	3.15362	0.264188	1.3593	16.6341	24.364	7.4364	7.31703
A10/15	2	2013	3	3	cream	26.5512	3.58733	0.374814	1.53389	19.8911	25.7298	5.64077	5.34389
A10/15	3	2013	3	3	cream	25.8742	3.34725	0.30025	1.47895	15.34	28.56	6.68	6.587
A10/15	1	2014	3	3	cream	15.4895	3.07063	0.370628	1.32294	49.9756	29.9216	10.1315	9.15733
A10/15	2	2014	3	3	cream	16.4928	3.20676	0.38372	1.47536	55.5556	25.0242	10.0483	9.56522
A10/15	3	2014	3	3	cream	17.9135	3.41538	0.341154	1.55	49.1346	27.5	11.0577	10.3846
T11/10	1	2013	1	3	cream	24.2116	2.58393	0.456053	1.03093	24.0081	42.8993	8.95219	4.88301
T11/10	2	2013	1	3	cream	22.668	2.28043	0.410711	0.833885	17.8189	31.6456	8.47128	4.47907
T11/10	3	2013	1	3	cream	20.8214	2.84805	0.479158	0.98193	17.8645	37.8234	8.11088	4.00411
T11/10	1	2014	1	3	cream	11.4272	3.01597	0.389647	1.22496	12.6754	20.2903	6.96662	6.57958
T11/10	2	2014	1	3	cream	13.8244	4.07024	0.277463	1.12185	20.0976	23.5122	6.53659	7.29268
T11/10	3	2014	1	3	cream	14.7647	3.41373	0.406765	1.2049	15.098	30.2941	6.56863	8.13725
T11/10	1	2013	2	3	cream	45.2605	5.07354	0.387947	1.41982	12.0531	17.8703	11.2462	8.88662
T11/10	2	2013	2	3	cream	46.8168	4.33497	0.345152	1.23781	17.0519	20.5779	12.4486	6.70127
T11/10	3	2013	2	3	cream	41.1648	4.5336	0.35331	1.38377	21.4037	22.3544	10.3534	7.76506
T11/10	1	2014	2	3	cream	11.6724	3.70005	0.461766	1.21855	40.814	25.3577	8.00543	6.51209
T11/10	2	2014	2	3	cream	16.9899	3.78292	0.312108	1.12277	39.2668	27.5929	9.38447	7.26194
T11/10	3	2014	2	3	cream	20.3011	4.71782	0.430209	1.34531	40.8936	27.4891	10.4046	6.99369
T11/10	1	2013	3	3	cream	18.5603	3.32056	0.380735	1.38685	22.9933	20.6111	4.14293	5.69653
T11/10	2	2013	3	3	cream	18.5285	3.3414	0.355787	1.43148	18.3801	29.1525	5.23002	5.81114
T11/10	3	2013	3	3	cream	18.9965	3.45057	0.346597	1.52807	24.1431	24.2077	6.35867	5.74963
T11/10	1	2014	3	3	cream	15.6083	3.20178	0.247478	1.24431	38.18	31.2562	8.11078	8.40752
T11/10	2	2014	3	3	cream	14.6226	3.08535	0.25703	1.24914	35.1258	27.8244	8.09077	8.18944
T11/10	3	2014	3	3	cream	16.7095	3.16502	0.315119	1.24802	39.5257	29.8419	8.3004	8.49802
SLANEY	1	2013	1	3	cream	20.2743	2.81047	0.419052	1.13815	16.4339	34.7132	8.87282	6.18454
SLANEY	2	2013	1	3	cream	19.1533	2.66034	0.351873	1.03552	17.129	23.455	6.90998	4.28224
SLANEY	3	2013	1	3	cream	17.5428	2.48741	0.395468	0.912487	15.71	29.9396	5.74018	5.82679
SLANEY	1	2014	1	3	cream	8.37848	2.28242	0.207012	0.773391	15.168	11.335	9.183	7.973
SLANEY	2	2014	1	3	cream	6.42664	2.98842	0.214286	0.624035	19.556	8.39768	10.027	5.53668
SLANEY	3	2014	1	3	cream	10.8037	2.48594	0.214998	0.806068	10.9521	7.4001	8.05871	6.61075
SLANEY	1	2013	2	3	cream	23.2	3.52675	0.350234	1.5761	21.2987	20.2078	8.93506	7.79221
SLANEY	2	2013	2	3	cream	28.3618	3.69406	0.310853	1.36951	15.1938	15.7106	8.88889	6.61499
SLANEY	3	2013	2	3	cream	26.5828	3.52038	0.303674	1.47363	18.6301	12.5818	6.24056	5.33468
SLANEY	1	2014	2	3	cream	13.4014	3.69388	0.317396	1.1691	44.4121	36.346	8.16327	8.51118
SLANEY	2	2014	2	3	cream	10.6115	3.47617	0.258739	1.36254	50.7222	32.9321	8.57005	7.12566
SLANEY	3	2014	2	3	cream	13.9722	3.2966	0.326497	1.20556	59.2238	38.2367	9.39147	9.19981
SLANEY	1	2013	3	3	cream	29.6219	2.45989	0.261676	0.69024	15.6362	35.115	4.14921	4.39448
SLANEY	2	2013	3	3	cream	25.3219	2.70523	0.200505	0.555634	16.8008	30.3823	4.82897	4.72837
SLANEY	3	2013	3	3	cream	29.8413	2.45337	0.191865	0.763294	14.5833	31.6468	5.35714	5.15873
SLANEY	1	2014	3	3	cream	15.367	2.76358	0.314013	1.20686	33.7464	38.1316	6.86368	6.67302
SLANEY	2	2014	3	3	cream	14.8299	2.61905	0.311662	1.17201	30.5151	30.0292	6.8999	6.70554
SLANEY	3	2014	3	3	cream	15.8444	2.80355	0.377745	1.25258	25.8986	36.7307	6.79468	7.18858
A2/11	1	2013	1	2	dark yellow	29.5084	4.30309	0.426001	1.03193	26.1176	30.2732	7.60264	5.98074
A2/11	2	2013	1	2	dark yellow	25.1499	4.44778	0.54333	0.915408	25.7497	28.4385	6.72182	5.82627
A2/11	3	2013	1	2	dark yellow	27.8146	4.08018	0.365869	1.0973	25.675	29.6485	8.27152	5.09424
A2/11	1	2014	1	2	dark yellow	17.5943	2.88115	0.378329	1.41575	28.282	20.334	10.024	9.737
A2/11	2	2014	1	2	dark yellow	12.8116	2.9971	0.269179	1.31536	26.377	20.918	8.309	8.087
A2/11	3	2014	1	2	dark yellow	14.1932	2.36505	0.455321	1.2359	25.1986	21.3732	9.55027	8.04316
A2/11	1	2013	2	2	dark yellow	41.938	2.98672	0.320118	1.22873	11.9036	28.1358	6.67437	6.80423
A2/11	2	2013	2	2	dark yellow	31.2906	3.3734	0.378424	1.45123	16.9458	31.4286	7.29064	6.99507
A2/11	3	2013	2	2	dark yellow	40.1214	3.59636	0.331816	1.15832	10.3187	25.8827	5.2605	6.27213
A2/11	1	2014	2	2	dark yellow	19.5771	3.69803	0.30865	1.55022	42.864	26.6218	7.66795	7.40029
A2/11	2	2014	2	2	dark yellow	15.7552	3.27147	0.275222	1.48569	33.2932	26.6831	8.98322	8.8845
A2/11	3	2014	2	2	dark yellow	13.1919	3.45486	0.364578	1.333	37.7898	21.1149	6.51209	8.78145
A2/11	1	2013	3	2	dark yellow	31.3619	3.90272	0.210895	1.43872	20.8171	25.5837	5.15564	5.54475
A2/11	2	2013	3	2	dark yellow	24.958	3.32038	0.281408	1.43172	21.5336	24.895	4.83193	6.30252
A2/11	3	2013	3	2	dark yellow	27.8543	3.52736	0.32844	1.58708	22.6	27.38	6.27	6.09
A2/11	1	2014	3	2	dark yellow	30.0745	5.13363	0.430999	2.22355	55.2757	50.1416	7.14	10.929
A2/11	2	2014	3	2	dark yellow	28.6748	5.24499	0.512225	2.05281	55.3545	54.0709	8.55	10.0733
A2/11	3	2014	3	2	dark yellow	29.9104	4.85956	0.613845	2.18227	47.51	57.6096	7.98	10.3625
A2/73	1	2013	1	2	dark yellow	41.0596	3.9623	0.22486	1.07285	17.728	28.9165	7.53948	6.92817
A2/73	2	2013	1	2	dark yellow	46.5544	3.61817	0.417509	1.28433	23.2772	31.756	8.98418	6.02348
A2/73	3	2013	1	2	dark yellow	43.5872	3.36947	0.30232	1.18725	21.57	33.58	7.99	7.09
A2/73	1	2014	1	2	dark yellow	12.7904	2.48289	0.279904	0.993157	7.80723	28.54	4.06024	6.72289
A2/73	2	2014	1	2	dark yellow	14.159	2.99952	0.220434	1.05542	12.1446	26.97	3.60241	8.86747
A2/73	3	2014	1	2	dark yellow	19.8742	2.78921	0.30211	0.89525	10.58	30.77	3.25	7.98
A2/73	1	2013	2	2	dark yellow	29.8511	3.47458	0.450021	1.01757	11.813	25.3724	7.29327	6.88238
A2/73	2	2013	2	2	dark yellow	33.4629	3.55257	0.549975	1.25361	11.0613	24.2152	7.87245	6.67663
A2/73	3	2013	2	2	dark yellow	34.7417	3.66116	0.510434	0.940083	14.2025	22.1901	7.98347	7.02479
A2/73	1	2014	2	2	dark yellow	17.9024	3.0318	0.471194	1.28661	36.7327	24.0329	9.18318	7.15321
A2/73	2	2014	2	2	dark yellow	13.4512	2.82983	0.518834	1.21033	32.3136	22.0612	9.27342	7.36138
A2/73	3	2014	2	2	dark yellow	15.5611	2.97357	0.571771	1.10963	28.2294	18.8529	8.08229	7.48628
A2/73	1	2013	3	2	dark yellow	19.6886	3.8438	0.505274	1.13913	17.6796	23.7248	5.12305	7.72577
A2/73	2	2013	3	2	dark yellow	22.2178	3.66783	0.491298	1.33764	15.4152	23.2939	7.35952	6.16609
A2/73	3	2013	3	2	dark yellow	23.7195	3.67683	0.594207	1.40549	20.9675	21.6463	6.45122	7.8252
A2/73	1	2014	3	2	dark yellow	19.8851	3.73289	0.545524	1.26759	44.0402	37.8171	8.32934	6.51029
A2/73	2	2014	3	2	dark yellow	19.7315	3.68971	0.538439	1.24217	54.4008	34.4107	7.95624	6.66335
A2/73	3	2014	3	2	dark yellow	20.118	3.70501	0.505801	1.2409	41.8879	35.3982	8.16126	6.588
A3/15	1	2013	1	2	dark yellow	31.1854	3.50287	0.744151	1.08616	19.9478	28.5692	11.906	5.01305
A3/15	2	2013	1	2	dark yellow	25.1891	3.51406	0.702813	0.84937	16.5858	29.2483	10.9602	5.43162
A3/15	3	2013	1	2	dark yellow	27.2387	4.00099	0.796055	1.09073	26.0355	25.6686	11.5385	5.45168
A3/15	1	2014	1	2	dark yellow	18.516	3.55577	0.634849	0.98899	45.476	19.531	12.361	9.861
A3/15	2	2014	1	2	dark yellow	16.1198	3.82122	0.640373	0.895383	38.703	19.941	11.851	7.76
A3/15	3	2014	1	2	dark yellow	13.6525	3.54667	0.632551	0.691336	34.414	20.755	10.861	8.032
A3/15	1	2013	2	2	dark yellow	39.3874	2.54743	0.492688	1.13142	26.8775	31.4229	7.917	7.41107
A3/15	2	2013	2	2	dark yellow	39.9706	2.4973	0.414223	1.45267	16.2825	28.4453	9.31829	6.27759
A3/15	3	2013	2	2	dark yellow	37.7737	4.46082	0.381733	1.18422	22.2107	20.5501	8.92579	7.78412
A3/15	1	2014	2	2	dark yellow	16.0522	2.76052	0.33701	1.1224	45.4765	24.0929	10.4499	7.35365
A3/15	2	2014	2	2	dark yellow	13.9617	2.96809	0.377811	1.06529	41.9539	31.9097	9.40403	7.46195
A3/15	3	2014	2	2	dark yellow	15.856	2.57004	0.339981	1.0214	47.7626	24.5136	8.36576	7.7821
A3/15	1	2013	3	2	dark yellow	20.7859	2.64012	0.316753	1.17684	17.1644	21.5098	5.48087	6.10134
A3/15	2	2013	3	2	dark yellow	14.8412	2.553	0.309819	0.988764	11.0405	17.489	5.56913	4.20127
A3/15	3	2013	3	2	dark yellow	16.8343	2.56607	0.380079	1.1144	13.7081	18.7377	6.01578	5.91716
A3/15	1	2014	3	2	dark yellow	21.3728	4.51358	0.493235	1.66716	33.5802	44.7901	9.67901	11.1605
A3/15	2	2014	3	2	dark yellow	21.4405	4.46448	0.389907	1.68643	32.3371	42.4302	9.70113	10.975
A3/15	3	2014	3	2	dark yellow	20.3565	4.34104	0.460116	1.62235	39.5954	46.262	9.44123	10.501
A3/74	1	2013	1	2	dark yellow	21.4614	2.74297	0.401533	0.94696	18.7021	24.0164	7.86919	4.59888
A3/74	2	2013	1	2	dark yellow	21.199	2.6801	0.435971	0.773464	13.5627	16.7076	6.31	3.85012
A3/74	3	2013	1	2	dark yellow	24.4223	2.33466	0.565239	1.00598	20.4183	23.1076	7.37052	3.98406
A3/74	1	2014	1	2	dark yellow	9.21383	1.76988	0.291309	0.723358	14.716	8.099	6.85	5.642
A3/74	2	2014	1	2	dark yellow	11.7979	1.61419	0.289504	0.629057	20.838	9.135	7.872	6.608
A3/74	3	2014	1	2	dark yellow	10.3657	1.96439	0.316073	0.9923	15.7844	8.95091	5.00481	6.641
A3/74	1	2013	2	2	dark yellow	35.4232	1.36024	0.363287	1.09744	9.74409	12.7953	4.82283	4.13386
A3/74	2	2013	2	2	dark yellow	35.2089	1.26623	0.410871	1.02466	12.8485	18.7217	5.73729	5.53598
A3/74	3	2013	2	2	dark yellow	32.1361	1.0075	0.334767	1.10955	11.7059	18.1091	6.003	5.0025
A3/74	1	2014	2	2	dark yellow	16.4631	2.77577	0.403517	1.14802	48.852	24.1329	7.23009	7.3278
A3/74	2	2014	2	2	dark yellow	15.6991	2.91707	0.422951	1.135	54.0984	33.269	8.49	7.32883
A3/74	3	2014	2	2	dark yellow	13.5828	2.58722	0.4259	1.20827	52.47	28.64	9.14	7.92
A3/74	1	2013	3	2	dark yellow	17.248	3.02819	0.221596	1.43746	18.9202	23.0291	8.12231	6.30674
A3/74	2	2013	3	2	dark yellow	27.2437	3.81865	0.190933	1.6847	23.0757	21.4982	8.86141	8.24317
A3/74	3	2013	3	2	dark yellow	21.2894	3.44928	0.195352	1.47026	16.2919	19.4903	9.49	6.9965
A3/74	1	2014	3	2	dark yellow	16.749	2.52273	0.438142	1.14921	42.4308	21.917	8.3004	7.6087
A3/74	2	2014	3	2	dark yellow	15.3824	2.5717	0.450574	1.16539	41.9694	22.6577	7.55258	7.64818
A3/74	3	2014	3	2	dark yellow	15.2031	2.56975	0.425746	1.15321	43.3676	22.5159	8.51689	7.83162
A3/108	1	2013	1	2	dark yellow	16.2584	3.25474	0.38521	0.98525	28.33	21.54	7.58	5.69
A3/108	2	2013	1	2	dark yellow	18.5741	3.48521	0.32487	0.84128	30.64	19.87	8.98	7.25
A3/108	3	2013	1	2	dark yellow	20.1483	3.6582	0.30367	0.99988	31.55	17.85	8.05	6.67
A3/108	1	2014	1	2	dark yellow	9.04245	3.97335	0.445015	0.673445	33.57	12.142	8.687	5.232
A3/108	2	2014	1	2	dark yellow	12.5692	3.50791	0.421146	0.891798	37.549	19.071	9.091	6.621
A3/108	3	2014	1	2	dark yellow	15.8523	3.85796	0.40824	0.74128	30.66	17.64	10.22	6.87
A3/108	1	2013	2	2	dark yellow	46.5537	5.39625	0.474725	1.02198	24.5506	27.3241	11.7103	5.64972
A3/108	2	2013	2	2	dark yellow	45.525	4.9107	0.453189	1.24239	21.6879	39.6467	10.95	6.96762
A3/108	3	2013	2	2	dark yellow	47.3711	5.08866	0.379381	1.11649	17.5258	33.4021	11.3402	6.59794
A3/108	1	2014	2	2	dark yellow	15.0561	4.353	0.375719	1.17796	50.902	33.1546	11.214	8.28864
A3/108	2	2014	2	2	dark yellow	11.7635	3.76158	0.415074	0.982562	52.3153	32.4138	9.55665	8.07882
A3/108	3	2014	2	2	dark yellow	17.5438	4.05837	0.40925	1.05724	78.57	30.87	10.74	8.67
A3/108	1	2013	3	2	dark yellow	18.0827	3.27619	0.382341	1.00767	17.9617	29.5661	6.05449	6.1554
A3/108	2	2013	3	2	dark yellow	24.0344	3.47624	0.277351	1.23559	20.3236	23.9636	8.39232	8.2912
A3/108	3	2013	3	2	dark yellow	23.2145	3.02587	0.32514	1.14728	23.11	26.15	7.98	7.57
A3/108	1	2014	3	2	dark yellow	21.1955	4.04312	0.578246	1.33562	60.2597	41.5512	7.23	8.62322
A3/108	2	2014	3	2	dark yellow	21.4356	3.94455	0.483267	1.25941	60.5941	44.7525	9.548	8.0198
A3/108	3	2014	3	2	dark yellow	21.284	4.00593	0.38163	1.30469	51.6543	44	8.1485	8.09877
A3/110	1	2013	1	2	dark yellow	20.4868	4.15499	0.261898	1.12767	22.3547	20.7352	10.3328	7.65027
A3/110	2	2013	1	2	dark yellow	29.0359	3.86359	0.281333	1.00103	17.5385	30.3077	9.87	7.38462
A3/110	3	2013	1	2	dark yellow	24.2258	4.36963	0.273327	1.1998	23.3766	27.5724	11.2887	8.59041
A3/110	1	2014	1	2	dark yellow	11.4215	2.33345	0.227152	0.620462	19.872	12.199	5.903	6.099
A3/110	2	2014	1	2	dark yellow	13.4937	2.91819	0.272666	0.84283	18.4697	6.25602	4.61983	7.31473
A3/110	3	2014	1	2	dark yellow	15.8743	2.58724	0.30014	0.75892	15.55	18.24	6.54	6.84
A3/110	1	2013	2	2	dark yellow	43.3561	2.4761	0.277268	1.25024	9.17073	16.878	9.7561	8
A3/110	2	2013	2	2	dark yellow	38.7425	2.33501	0.204326	1.37022	11.4688	21.0865	8.14889	8.04829
A3/110	3	2013	2	2	dark yellow	31.2084	2.84883	0.152163	1.43312	11.5365	23.9682	7.65788	8.24366
A3/110	1	2014	2	2	dark yellow	14.9539	3.19942	0.257933	1.15813	39.6943	36.5842	7.86026	7.33721
A3/110	2	2014	2	2	dark yellow	8.47582	2.91973	0.27147	1.25338	43.9072	36.3636	8.2205	8.60735
A3/110	3	2014	2	2	dark yellow	15.2324	3.18991	0.246489	1.30762	41.7409	32.5519	9.18	9.39664
A3/110	1	2013	3	2	dark yellow	22.2424	3.11832	0.412023	1.58397	19.8092	17.6527	6.48855	6.87023
A3/110	2	2013	3	2	dark yellow	18.5067	2.76401	0.398855	1.38268	15.6297	19.0144	7.05	6.57043
A3/110	3	2013	3	2	dark yellow	24.0364	3.00354	0.375569	1.4001	21.8513	19.0187	5.86748	6.67678
A3/110	1	2014	3	2	dark yellow	16.4773	4.04296	0.406253	1.58186	42.864	36.8496	12.42	9.06921
A3/110	2	2014	3	2	dark yellow	16.0544	3.83382	0.4345	1.56851	46.9388	35.277	10.9815	8.35763
A3/110	3	2014	3	2	dark yellow	16.4346	3.86568	0.490667	1.57235	52.642	38.1975	11.4568	8.79012
A3/142	1	2013	1	2	dark yellow	21.4581	3.02567	0.32514	0.98527	25.22	20.58	5.54	7.25
A3/142	2	2013	1	2	dark yellow	25.3691	3.25409	0.28721	1.08825	23.88	23.57	6.21	6.11
A3/142	3	2013	1	2	dark yellow	19.7852	3.14752	0.36714	0.90527	27.9	19.68	5.55	6.87
A3/142	1	2014	1	2	dark yellow	8.79981	2.97195	0.403385	0.840716	30.2824	12.6692	4.0619	6.09284
A3/142	2	2014	1	2	dark yellow	9.34511	2.89593	0.448012	0.885223	29.161	12.96	6.382	6.873
A3/142	3	2014	1	2	dark yellow	13.2285	2.74595	0.482752	1.03587	28.403	14.545	5.678	7.337
A3/142	1	2013	2	2	dark yellow	24.9066	3.64627	0.278838	1.08299	15.7054	25.9129	4.97925	6.12033
A3/142	2	2013	2	2	dark yellow	31.1913	3.39595	0.237123	0.962234	17.909	27.5828	6.92042	7.11814
A3/142	3	2013	2	2	dark yellow	27.4705	3.41152	0.273732	0.995866	18.5433	31.7323	5.68898	7.54724
A3/142	1	2014	2	2	dark yellow	15.1046	3.1708	0.277664	1.1056	28.7105	30.2433	8.46715	7.49392
A3/142	2	2014	2	2	dark yellow	9.94065	3.24827	0.227201	1.1632	24.8961	33.5312	8.20969	7.51731
A3/142	3	2014	2	2	dark yellow	10.7212	2.95244	0.224366	1.08255	24.4639	25.731	7.75049	6.14035
A3/142	1	2013	3	2	dark yellow	22.0717	3.14243	0.287052	1.47291	20.1195	25.4582	9.56175	6.3745
A3/142	2	2013	3	2	dark yellow	21.0072	3.06886	0.271634	1.43474	24.0493	20.1439	8.22199	7.60534
A3/142	3	2013	3	2	dark yellow	22.1032	3.23886	0.231547	1.57436	30.5458	20.1302	7.22584	8.21382
A3/142	1	2014	3	2	dark yellow	15.7225	2.77799	0.321818	1.20957	40.0957	23.445	8.32536	8.22967
A3/142	2	2014	3	2	dark yellow	14.9591	2.70226	0.377104	1.10919	41.5584	22.5108	8.85041	7.98461
A3/142	3	2014	3	2	dark yellow	15.35	2.77085	0.39511	1.19655	48.2263	23.3941	8.34132	8.4372
A3/206	1	2013	1	1	dark yellow	37.2459	3.75285	0.280894	0.850305	14.0244	31.9106	7.31707	6.19919
A3/206	2	2013	1	1	dark yellow	31.4343	3.954	0.209361	0.814696	16.004	38.2134	6.44187	6.54253
A3/206	3	2013	1	2	dark yellow	39.0905	3.64567	0.285922	0.958829	14.867	34.7363	7.74069	6.48283
A3/206	1	2014	1	2	dark yellow	11.3874	2.64714	0.323476	1.08977	24.1959	25.3481	5.4892	5.85694
A3/206	2	2014	1	2	dark yellow	11.7066	3.05177	0.29511	1.14324	25.024	18.8878	4.60211	6.16299
A3/206	3	2014	1	2	dark yellow	8.53704	2.76511	0.352632	1.04386	26.5107	23.2768	4.53411	6.72515
A3/206	1	2013	2	2	dark yellow	35.4898	3.19592	0.190918	1.30204	15.7551	17.3469	6.12245	7.55102
A3/206	2	2013	2	2	dark yellow	31.0436	3.13455	0.239615	1.18034	11.7528	18.9463	5.47112	6.4843
A3/206	3	2013	2	2	dark yellow	39.0563	3.41117	0.205729	1.17092	17.429	22.9321	7.34039	7.9923
A3/206	1	2014	2	2	dark yellow	14.3687	3.51567	0.283696	1.20755	35.6072	18.2879	8.7731	7.74069
A3/206	2	2014	2	2	dark yellow	18.8018	3.73697	0.330151	1.39503	33.2197	23.6094	9.83926	8.96249
A3/206	3	2014	2	2	dark yellow	20.5873	3.34724	0.30847	1.35802	30.22	21.54	7.25	7.08
A3/206	1	2013	3	2	dark yellow	21.0569	3.46443	0.209553	1.26524	14.4309	20.3252	6.80894	6.40244
A3/206	2	2013	3	2	dark yellow	17.9171	2.99749	0.266152	1.23337	11.4754	17.9826	6.07522	5.40019
A3/206	3	2013	3	2	dark yellow	23.9118	3.01612	0.221896	1.29549	11.5256	19.9696	5.98074	6.69032
A3/206	1	2014	3	2	dark yellow	26.5874	2.78534	0.35421	1.10236	18.56	21.87	7.25	5.36
A3/206	2	2014	3	2	dark yellow	28.5739	2.58936	0.3911	1.25402	20.81	23.65	8.21	6.85
A3/206	3	2014	3	2	dark yellow	30.2581	3.02744	0.30866	1.19874	16.77	25.66	7.98	6
A3/223	1	2013	1	2	dark yellow	22.301	1.83602	0.438738	1.03883	15.7282	22.0388	7.16	6.8932
A3/223	2	2013	1	2	dark yellow	18.4631	1.55763	0.414434	0.879751	14.0187	17.2378	5.81516	4.36137
A3/223	3	2013	1	2	dark yellow	24.5874	2.14728	0.40824	0.95427	10.5	20.88	6.25	5.96
A3/223	1	2014	1	2	dark yellow	6.90281	2.97533	0.209275	0.773952	11.0508	8.09077	4.78	4.44006
A3/223	2	2014	1	2	dark yellow	8.17928	2.55807	0.207807	0.754024	10.4096	10.4096	3.08434	5.01205
A3/223	3	2014	1	2	dark yellow	11.2767	2.69051	0.220517	0.76622	14.9031	12.7819	2.88127	6.75609
A3/223	1	2013	2	2	dark yellow	30.1989	4.78878	0.212851	1.02489	13.9898	23.6614	4.99745	4.87557
A3/223	2	2013	2	2	dark yellow	23.6658	4.399	0.220998	1.05736	13.8653	22.3192	6.68	5.18703
A3/223	3	2013	2	2	dark yellow	26.8362	4.9939	0.291455	1.1472	13.3266	20.6816	7.85	6.10376
A3/223	1	2014	2	2	dark yellow	14.8152	3.77052	0.372252	1.09265	48.879	24.772	7.68123	6.04897
A3/223	2	2014	2	2	dark yellow	12.4665	3.38859	0.354144	0.958412	45.6576	22.928	9.32	7.3598
A3/223	3	2014	2	2	dark yellow	11.9786	3.8616	0.376413	1.15302	52.8265	19.5906	8.96686	8.8694
A3/223	1	2013	3	2	dark yellow	25.0358	3.90174	0.135619	1.06633	19.0379	23.7462	7.67656	7.51894
A3/223	2	2013	3	2	dark yellow	20.0103	3.08884	0.158471	0.911674	12.9132	14.0496	5.47521	5.06198
A3/223	3	2013	3	2	dark yellow	22.5874	3.54729	0.18899	1.12532	15.09	17.98	6.55	6.25
A3/223	1	2014	3	2	dark yellow	16.2123	3.76728	0.318793	1.33982	26.1538	24.4693	9.78	7.88705
A3/223	2	2014	3	2	dark yellow	13.7356	3.39042	0.316954	1.1887	23.2759	25.4981	8.9	5.65134
A3/223	3	2014	3	2	dark yellow	15.9942	3.55128	0.392778	1.33173	21.9547	23.2065	7.9923	7.60713
A3/346	1	2013	1	2	dark yellow	26.6929	3.92629	0.273415	0.8343	14.3735	25.258	9.72973	3.83292
A3/346	2	2013	1	2	dark yellow	21.9433	3.34615	0.266802	0.917206	13.7652	24.1903	8.80567	4.37652
A3/346	3	2013	1	2	dark yellow	24.5104	3.56979	0.226979	0.839375	13.75	29.5833	7.5	5
A3/346	1	2014	1	2	dark yellow	8.39388	2.5086	0.229159	0.641109	19.0535	11.8547	4.68	4.49331
A3/346	2	2014	1	2	dark yellow	11.1782	3.19703	0.154554	0.712871	15.4455	12.2871	6.0396	4.55446
A3/346	3	2014	1	2	dark yellow	9.71401	2.99761	0.237482	0.548853	23.816	13.763	5.857	5.466
A3/346	1	2013	2	2	dark yellow	41.4902	3.24837	0.230306	1.01465	12.6443	16.9594	6.62318	7.3151
A3/346	2	2013	2	2	dark yellow	47.6583	3.13991	0.232793	1.35395	9.81836	21.6004	8.43	8.34561
A3/346	3	2013	2	2	dark yellow	41.773	2.80321	0.280468	1.23624	15.0999	17.925	7.13	7.01413
A3/346	1	2014	2	2	dark yellow	12.8487	2.89352	0.195776	1.02947	46.5226	24.9312	8.05501	7.07269
A3/346	2	2014	2	2	dark yellow	12.4606	3.05886	0.229921	1.11614	49.9016	25.5906	9.84252	7.67717
A3/346	3	2014	2	2	dark yellow	10.3027	2.6875	0.185742	1.11035	43.457	25.5859	9.375	7.57031
A3/346	1	2013	3	2	dark yellow	20.2732	2.75951	0.27239	1.3278	14.439	19.7561	6.73171	7.21951
A3/346	2	2013	3	2	dark yellow	19.7269	2.93475	0.30526	1.41528	18.7699	17.6024	7.78958	7.48609
A3/346	3	2013	3	2	dark yellow	26.1499	3.08521	0.312361	1.27964	20.3647	22.0871	8.10537	6.78825
A3/346	1	2014	3	2	dark yellow	26.6377	5.75109	0.494404	1.52533	42.6773	38.9773	10.9986	8.00772
A3/346	2	2014	3	2	dark yellow	25.9383	5.62665	0.477609	1.49633	45.1739	39.9804	11.367	7.83929
A3/346	3	2014	3	2	dark yellow	25.8317	5.53346	0.406405	1.50191	43.3078	36.1377	10.4207	7.74379
A3/351	1	2013	1	2	dark yellow	36.6186	3.17423	0.204948	1.27526	23.8144	40.5155	9.38144	8.65979
A3/351	2	2013	1	2	dark yellow	22.3387	2.96807	0.357496	1.21786	19.0199	31.5381	9.21883	7.9573
A3/351	3	2013	1	2	dark yellow	29.4927	2.6361	0.329756	1.18927	19.9024	37.6098	7.60976	7.07317
A3/351	1	2014	1	2	dark yellow	13.2848	3.0228	0.4459	1.13149	34.546	25.711	9.52	9.316
A3/351	2	2014	1	2	dark yellow	12.2244	2.73691	0.333174	1.22052	31.927	19.929	10.56	8.026
A3/351	3	2014	1	2	dark yellow	13.3531	2.96548	0.342899	1.09684	28.008	21.314	11.7	7.002
A3/351	1	2013	2	2	dark yellow	44.1321	4.88998	0.257997	1.07105	16.2559	20.2412	10.68	7.01206
A3/351	2	2013	2	2	dark yellow	47.0903	4.54766	0.201815	1.07816	19.5663	23.4997	11.3969	8.57287
A3/351	3	2013	2	2	dark yellow	43.7219	4.35685	0.191431	1.19734	20.3476	26.2781	9.06	6.95297
A3/351	1	2014	2	2	dark yellow	11.8569	3.08801	0.373791	1.30561	36.3636	33.6557	7.93037	8.80077
A3/351	2	2014	2	2	dark yellow	13.1878	3.22562	0.359534	1.23241	30.8491	36.7783	7.76322	6.30762
A3/351	3	2014	2	2	dark yellow	14.6608	2.9705	0.395477	1.47886	32.4484	30.2557	9.24287	7.0295
A3/351	1	2013	3	2	dark yellow	26.5071	3.80346	0.384318	1.48473	19.2464	25.7637	5.49898	7.12831
A3/351	2	2013	3	2	dark yellow	21.6042	3.71771	0.315312	1.64479	16.6667	20.9375	6.97917	8.125
A3/351	3	2013	3	2	dark yellow	23.4711	3.81818	0.306818	1.57149	17.0455	16.0124	7.36	6.09504
A3/351	1	2014	3	2	dark yellow	18.2125	3.85799	0.470407	1.55611	42.1053	33.1678	10.6256	9.23535
A3/351	2	2014	3	2	dark yellow	19.0472	3.67328	0.439096	1.56778	33.2613	34.2829	11.002	9.23379
A3/351	3	2014	3	2	dark yellow	14.7079	3.42027	0.345606	1.62926	37.5896	38.0118	10.8002	8.89102
A3/368	1	2013	1	2	dark yellow	22.6453	1.78808	0.310421	1.07816	19.9399	28.1563	8.81764	6.51303
A3/368	2	2013	1	2	dark yellow	27.0193	2.09217	0.316175	0.972737	15.2594	24.0081	7.01933	5.96745
A3/368	3	2013	1	2	dark yellow	20.7092	1.85258	0.350355	1.15502	21.4083	25.0861	8.51064	7.7001
A3/368	1	2014	1	2	dark yellow	10.0397	3.1498	0.275694	0.699802	22.7976	9.02778	8.08	6.86905
A3/368	2	2014	1	2	dark yellow	12.3911	2.96554	0.3303	0.753533	25.169	12.294	7.81	6.97
A3/368	3	2014	1	2	dark yellow	9.84127	2.84512	0.20683	0.547475	24.242	10.005	9.235	6.157
A3/368	1	2013	2	2	dark yellow	38.5677	3.32641	0.355631	1.39491	35.7032	20.7213	8.40685	7.13337
A3/368	2	2013	2	2	dark yellow	38.5839	3.87173	0.389738	1.11544	26.3725	13.648	8.0041	6.05439
A3/368	3	2013	2	2	dark yellow	36.1966	4.02974	0.303981	1.29281	30.8921	14.8681	7.52	5.3717
A3/368	1	2014	2	2	dark yellow	10.9469	2.61932	0.222222	0.918647	46.4734	19.0338	7.82609	7.24638
A3/368	2	2014	2	2	dark yellow	10.9547	2.52073	0.191225	1.05815	36.3259	16.297	8.00386	6.55738
A3/368	3	2014	2	2	dark yellow	8.47019	2.12115	0.218942	0.840192	34.0385	16.4423	7.11538	6.76923
A3/368	1	2013	3	2	dark yellow	21.4374	3.23614	0.23347	1.3614	16.7351	19.7125	7.90554	6.87885
A3/368	2	2013	3	2	dark yellow	19.8621	3.67799	0.349188	1.24525	18.4589	23.5352	6.99163	5.82521
A3/368	3	2013	3	2	dark yellow	18.8889	2.93291	0.264885	1.49895	16.9811	21.2788	6.49895	6.91824
A3/368	1	2014	3	2	dark yellow	21.7975	4.13235	0.351704	1.32049	38.0247	39.8025	9.54	6.91358
A3/368	2	2014	3	2	dark yellow	21.5467	4.14397	0.403988	1.27626	39.7082	32.8794	10.7004	6.71206
A3/368	3	2014	3	2	dark yellow	22.2297	4.41807	0.410572	1.34358	34.5747	43.1523	10.66	7.78472
A9/4	1	2013	1	2	dark yellow	17.3327	1.95439	0.310957	0.920079	15.5677	33.3421	8.72583	7.53594
A9/4	2	2013	1	2	dark yellow	21.4074	2.08042	0.375012	0.962183	17.8076	28.7219	6.89325	6.0742
A9/4	3	2013	1	2	dark yellow	16.768	1.45683	0.32822	1.12494	14.9542	35.302	6.84998	7.04293
A9/4	1	2014	1	2	dark yellow	15.051	3.3194	0.33719	0.902577	28.099	24.404	9.431	6.417
A9/4	2	2014	1	2	dark yellow	10.5109	2.80827	0.268759	0.686423	24.6715	22.7251	10.2652	4.28224
A9/4	3	2014	1	2	dark yellow	13.587	3.02478	0.28733	0.87424	20.85	28.25	8.69	5.89
A9/4	1	2013	2	2	dark yellow	35.0565	1.98331	0.210113	1.05449	16.2838	27.5601	5.59647	5.5783
A9/4	2	2013	2	2	dark yellow	38.8189	2.16935	0.291801	1.13909	14.695	25.9639	5.85652	4.39239
A9/4	3	2013	2	2	dark yellow	34.9534	1.56166	0.189741	0.925596	14.8187	24.3523	7.15026	4.45596
A9/4	1	2014	2	2	dark yellow	12.5198	2.11561	0.337846	1.11957	58.3004	30.6087	6.71937	7.70751
A9/4	2	2014	2	2	dark yellow	7.36425	1.97101	0.277198	0.84715	60	21.9372	5.7971	5.99034
A9/4	3	2014	2	2	dark yellow	10.2582	2.24721	0.30422	0.99321	52.11	25.58	7.25	6.86
A9/4	1	2013	3	2	dark yellow	23.9663	3.49727	0.336143	1.50773	17.65	16.7828	6.941	4.75954
A9/4	2	2013	3	2	dark yellow	26.4733	3.24122	0.360509	1.66209	23.0025	20.2545	5.69975	6.26209
A9/4	3	2013	3	2	dark yellow	22.5872	3.02574	0.31255	1.45837	21.64	24.36	7.57	5.25
A9/4	1	2014	3	2	dark yellow	26.3597	5.79544	0.441251	1.58992	64.6631	42.9472	11.2816	8.8221
A9/4	2	2014	3	2	dark yellow	27.4805	5.75879	0.409766	1.64844	61.2305	50.1953	12.3789	9.96094
A9/4	3	2014	3	2	dark yellow	27.1844	5.55884	0.382373	1.6141	59.0758	54.3116	10.8623	8.38495
A9/8	1	2013	1	2	dark yellow	27.4851	3.1	0.209307	0.809703	14.9505	24.5545	6.93069	5.74257
A9/8	2	2013	1	2	dark yellow	24.3056	3.88492	0.20506	1.06548	19.8413	25.8929	8.03571	6.04365
A9/8	3	2013	1	2	dark yellow	28.8256	3.63342	0.215528	0.905651	16.3145	29.1155	7.17445	5.89681
A9/8	1	2014	1	2	dark yellow	10.4235	3.436	0.248027	1.05582	28.9605	13.8595	6.25602	8.95091
A9/8	2	2014	1	2	dark yellow	15.8321	3.11206	0.303147	0.781211	32.713	22.89	7.535	8.298
A9/8	3	2014	1	2	dark yellow	13.5871	3.65827	0.29533	0.98724	25.87	18.57	8.25	8.247
A9/8	1	2013	2	2	dark yellow	26.4973	2.32926	0.44807	1.1148	10.8451	27.4548	8.10943	7.13239
A9/8	2	2013	2	2	dark yellow	30.2073	3.00691	0.271668	1.27443	16.5844	23.0997	10.2665	7.40375
A9/8	3	2013	2	2	dark yellow	32.9307	2.43267	0.349703	1.12673	13	27.4257	9.64356	6.94059
A9/8	1	2014	2	2	dark yellow	13.0596	3.20332	0.235875	1.07038	37.5367	20.25	9.18866	8.79765
A9/8	2	2014	2	2	dark yellow	10.9862	2.83432	0.371893	1.04931	33.3826	17.7515	8.08679	7.98817
A9/8	3	2014	2	2	dark yellow	9.05594	2.9264	0.307262	0.993621	34.917	11.519	7.337	6.809
A9/8	1	2013	3	2	dark yellow	23.0957	3.07739	0.306762	1.32892	13.9511	27.1079	7.63747	7.31365
A9/8	2	2013	3	2	dark yellow	19.1522	3.19461	0.336609	1.34875	19.9422	28.131	5.68401	8.47784
A9/8	3	2013	3	2	dark yellow	20.9676	3.07731	0.287182	1.38254	16.6584	26.8329	7.38155	6.78304
A9/8	1	2014	3	2	dark yellow	29.7596	4.48846	0.324038	1.89231	38.8462	45.9615	10.5962	10.2308
A9/8	2	2014	3	2	dark yellow	29.3005	5.81872	0.427783	1.77241	39.803	41.6749	12.3399	9.9064
A9/8	3	2014	3	2	dark yellow	29.1086	3.33415	0.334632	1.86556	33.5509	44.7151	11.0175	11.8334
T9/13	1	2013	1	2	dark yellow	32.649	3.18696	0.301864	1.16353	18.2374	40.2598	9.06775	7.84513
T9/13	2	2013	1	2	dark yellow	32.1	3.567	0.2203	1.282	16.5	43.4	8.6	8.9
T9/13	3	2013	1	2	dark yellow	33.1606	3.38923	0.213618	1.11179	20.0203	37.3984	7.72358	7.91057
T9/13	1	2014	1	2	dark yellow	10.1918	2.47516	0.265125	0.771274	28.6572	18.3773	8.26267	5.80423
T9/13	2	2014	1	2	dark yellow	13.4932	2.6409	0.278376	0.836986	22.211	22.016	10.078	7.078
T9/13	3	2014	1	2	dark yellow	10.954	2.80235	0.217025	0.734149	24.07	12.622	9.556	6.654
T9/13	1	2013	2	2	dark yellow	29.8456	3.28873	0.339887	1.03448	13.8085	19.176	6.07308	7.20535
T9/13	2	2013	2	2	dark yellow	24.9044	2.86366	0.350956	1.10471	15.2035	15.8901	6.86611	7.35655
T9/13	3	2013	2	2	dark yellow	28.1322	3.15123	0.406891	1.25088	9.41412	16.2243	6.40961	6.10916
T9/13	1	2014	2	2	dark yellow	12.9515	2.74302	0.287078	1.50367	42.5991	24.9633	9.49584	9.35585
T9/13	2	2014	2	2	dark yellow	12.6587	2.91865	0.33621	1.40873	58.9286	28.373	8.73016	9.92063
T9/13	3	2014	2	2	dark yellow	10.6644	2.60211	0.309291	1.29434	46.4046	33.8447	9.10834	8.91659
T9/13	1	2013	3	2	dark yellow	19.0398	3.52607	0.2762	1.34022	20.6505	22.7001	7.84719	6.5049
T9/13	2	2013	3	2	dark yellow	27.5145	3.86395	0.261745	1.40767	21.4241	30.4782	9.98424	5.98424
T9/13	3	2013	3	2	dark yellow	21.0159	3.43247	0.314044	1.26096	23.9442	21.1155	8.88048	5.47809
T9/13	1	2014	3	2	dark yellow	15.8858	3.34172	0.372507	1.31752	48.6544	29.332	9.87415	7.93804
T9/13	2	2014	3	2	dark yellow	15.9047	3.52432	0.429475	1.34144	41.4397	35.3113	9.53307	8.36576
T9/13	3	2014	3	2	dark yellow	16.1108	3.32426	0.335537	1.3544	49.4895	27.3213	9.82013	8.55615
T10/8	1	2013	1	2	dark yellow	22.6104	3.46712	0.330422	0.732287	10.7949	22.8656	7.06575	5.59372
T10/8	2	2013	1	2	dark yellow	22.7781	3.44741	0.333971	0.9692	14.2929	30.2969	6.64318	5.63664
T10/8	3	2013	1	2	dark yellow	23.6925	0.398222	0.431276	0.895188	10.1464	24.1632	5.91632	5.64854
T10/8	1	2014	1	2	dark yellow	10.5596	2.18978	0.24837	0.550073	18.589	13.431	9.309	3.796
T10/8	2	2014	1	2	dark yellow	13.6428	2.63269	0.351968	0.68446	19.546	18.163	7.77	5.064
T10/8	3	2014	1	2	dark yellow	11.056	2.54015	0.380876	0.656156	10.1144	21.1679	8.49148	4.57421
T10/8	1	2013	2	2	dark yellow	29.5034	2.88101	0.245629	1.04397	16.7253	15.4165	9.31195	7.44956
T10/8	2	2013	2	2	dark yellow	27.4459	2.40824	0.307209	1.28012	13.5942	21.6272	6.48816	7.00309
T10/8	3	2013	2	2	dark yellow	22.2101	2.67136	0.300396	1.03964	12.884	16.2438	8.36967	6.25273
T10/8	1	2014	2	2	dark yellow	10.7448	3.2518	0.296973	1.23787	39.5002	33.4455	9.13023	5.69101
T10/8	2	2014	2	2	dark yellow	9.06146	2.67512	0.275512	1.20585	30.9268	36.6829	6.43902	7.41463
T10/8	3	2014	2	2	dark yellow	11.7073	2.58058	0.266858	1.1736	36.1119	30.3993	7.07795	6.31277
T10/8	1	2013	3	2	dark yellow	17.1639	3.39549	0.304711	1.46811	15.5054	28.8518	5.10304	8.83219
T10/8	2	2013	3	2	dark yellow	19.7848	3.85819	0.353496	1.22347	17.8973	18.1907	8.11736	6.74817
T10/8	3	2013	3	2	dark yellow	20.1473	3.52814	0.31577	1.32432	19.34	23.58	6.98	7.2789
T10/8	1	2014	3	2	dark yellow	15.4973	3.24295	0.470213	1.27363	47.3924	29.9852	8.21376	6.53142
T10/8	2	2014	3	2	dark yellow	15.3823	3.18895	0.471929	1.23927	59.6941	28.3177	7.59743	6.51209
T10/8	3	2014	3	2	dark yellow	14.7266	3.14355	0.478516	1.19141	39.9414	26.9531	7.61719	5.95703
AGRIA	1	2013	1	2	dark yellow	25.904	3.0632	0.341793	0.832435	17.5404	26.4576	7.15336	5.4096
AGRIA	2	2013	1	2	dark yellow	23.9653	3.6132	0.273904	0.92844	18.8583	32.7217	9.98981	6.82977
AGRIA	3	2013	1	2	dark yellow	32.4238	3.42119	0.29536	0.711628	14.2636	33.385	8.27132	5.99483
AGRIA	1	2014	1	2	dark yellow	12.9395	3.35932	0.447651	1.47821	28.184	18.692	8.814	6.683
AGRIA	2	2014	1	2	dark yellow	15.5556	3.37021	0.470451	1.61766	24.061	23.581	9.704	8.54
AGRIA	3	2014	1	2	dark yellow	11.2379	3.52128	0.448356	1.51064	28.1431	20.5029	8.41393	7.05996
AGRIA	1	2013	2	2	dark yellow	28.1942	3.31715	0.235508	1.26166	19.2059	24.2792	8.19423	5.56399
AGRIA	2	2013	2	2	dark yellow	26.7824	3.24499	0.227677	0.873447	18.2885	33.3496	6.94377	4.20538
AGRIA	3	2013	2	2	dark yellow	23.0059	3.28585	0.278487	1.01768	24.9116	22.6916	5.51866	4.22397
AGRIA	1	2014	2	2	dark yellow	14.8668	3.21162	0.33753	1.3908	48.2082	29.54	7.36077	6.00484
AGRIA	2	2014	2	2	dark yellow	18.9109	3.00693	0.379406	1.50693	41.8812	22.9109	9.90099	7.52475
AGRIA	3	2014	2	2	dark yellow	16.7479	3.47389	0.252611	1.44938	41.4719	26.9518	8.92889	7.34858
AGRIA	1	2013	3	2	dark yellow	23.5893	3.20587	0.25725	1.14502	23.64	23.58	7.32	5.87
AGRIA	2	2013	3	2	dark yellow	26.059	3.45422	0.30825	1.28732	25.08	25.95	8.47	6.47
AGRIA	3	2013	3	2	dark yellow	29.8753	3.65854	0.33722	1.00821	28.33	28.55	9.01	6.74
AGRIA	1	2014	3	2	dark yellow	19.2986	4.13541	0.302094	1.5772	36.1422	29.5178	8.76766	6.81929
AGRIA	2	2014	3	2	dark yellow	21.3445	4.38062	0.323628	1.65892	35.9713	25.0124	9.0954	7.61246
AGRIA	3	2014	3	2	dark yellow	20.2411	3.99518	0.325362	1.52555	36.837	30.7618	8.10029	6.26808
GRANOLA	1	2013	1	2	dark yellow	20.793	2.48742	0.409643	1.08174	12.4327	23.7885	7.44004	3.32844
GRANOLA	2	2013	1	2	dark yellow	23.4935	2.1723	0.463049	1.17313	20.155	29.354	7.95866	4.03101
GRANOLA	3	2013	1	2	dark yellow	25.8742	2.05869	0.38933	0.98521	18.54	26.87	7.021	5.412
GRANOLA	1	2014	1	2	dark yellow	16.3191	4.1384	0.426718	1.18116	35.7617	23.3614	8.95867	6.247
GRANOLA	2	2014	1	2	dark yellow	16.0976	3.64132	0.403778	1.1956	33.094	18.651	9.66	7.461
GRANOLA	3	2014	1	2	dark yellow	11.692	3.33791	0.437273	0.987739	30.448	21.677	10.201	6.572
GRANOLA	1	2013	2	2	dark yellow	36.7532	3.95205	0.466533	1.68531	20.4795	34.8751	7.79221	4.4955
GRANOLA	2	2013	2	2	dark yellow	35.8202	4.34783	0.366502	1.54051	23.5494	32.9051	9.78261	5.42292
GRANOLA	3	2013	2	2	dark yellow	33.1066	4.43756	0.400609	1.70355	25.3299	39.8985	9.94924	4.56853
GRANOLA	1	2014	2	2	dark yellow	9.79472	3.61975	0.363636	1.17009	33.1408	34.1447	9.38416	6.25611
GRANOLA	2	2014	2	2	dark yellow	10.3545	3.25304	0.261	1.17727	39.0529	31.4716	9.13065	5.53667
GRANOLA	3	2014	2	2	dark yellow	9.37894	3.06987	0.370791	1.25764	41.2785	38.3309	8.73362	5.72538
GRANOLA	1	2013	3	2	dark yellow	22.1886	3.7061	0.362585	1.68838	24.5909	30.3283	6.4617	6.4617
GRANOLA	2	2013	3	2	dark yellow	17.7835	3.71959	0.353196	1.73918	20.9278	26.9072	4.84536	7.1134
GRANOLA	3	2013	3	2	dark yellow	22.8763	3.75455	0.412848	2.0441	28.7344	33.2685	7.28667	6.04027
GRANOLA	1	2014	3	2	dark yellow	17.1443	3.40726	0.411482	1.15505	40.1374	42.3386	9.02846	5.10304
GRANOLA	2	2014	3	2	dark yellow	17.1004	3.55072	0.489758	1.1044	45.3241	35.7249	10.6878	5.24493
GRANOLA	3	2014	3	2	dark yellow	18.0717	3.56202	0.431395	1.17636	43.3295	38.6628	10.8527	6.10465
A1/9	1	2013	1	1	light yellow	26.6246	2.2386	0.329583	0.951018	24.1513	31.8138	9.9903	5.81959
A1/9	2	2013	1	1	light yellow	23.2405	2.19342	0.335494	1.00658	20.0506	33.3165	8.50633	4.86076
A1/9	3	2013	1	1	light yellow	22.6146	2.40208	0.374063	1.10521	21.25	29.5833	8.95833	5.3125
A1/9	1	2014	1	1	light yellow	19.6923	3.8794	0.563474	1.10968	37.419	22.615	11.995	9.529
A1/9	2	2014	1	1	light yellow	17.7449	3.74104	0.568323	1.35308	34.687	20.06	11.467	10.225
A1/9	3	2014	1	1	light yellow	11.1987	3.53009	0.513754	1.24298	33.7249	21.9102	11.1461	9.62369
A1/9	1	2013	2	1	light yellow	50.448	5.00353	0.409819	1.16683	18.3985	33.6416	10.2507	6.19638
A1/9	2	2013	2	1	light yellow	45.8018	4.8764	0.450868	1.22472	16.4454	30.7457	9.88662	6.53728
A1/9	3	2013	2	1	light yellow	50.267	5.08237	0.569924	1.18589	17.2292	33.6272	11.1839	7.45592
A1/9	1	2014	2	1	light yellow	12.9706	3.23824	0.220588	1.35784	33.5294	30.4118	10.098	9.5098
A1/9	2	2014	2	1	light yellow	15.2718	3.69426	0.288678	1.50723	40.0998	35.0125	10.3741	10.5736
A1/9	3	2014	2	1	light yellow	14.7489	3.32471	0.260865	1.41919	40.2785	28.9682	10.6415	9.9453
A1/9	1	2013	3	1	light yellow	18.4302	3.27727	0.225688	1.59072	26.8196	25.1203	6.21814	7.9317
A1/9	2	2013	3	1	light yellow	22.2521	3.55361	0.266567	1.71699	28.2013	24.7135	6.17838	9.06826
A1/9	3	2013	3	1	light yellow	21.5242	3.907	0.358908	1.73223	24.7168	28.999	8.34192	8.65088
A1/9	1	2014	3	1	light yellow	16.2523	3.56922	0.31255	1.58755	32.25	28.52	8.24	9.55
A1/9	2	2014	3	1	light yellow	18.2567	3.85302	0.28024	1.45853	30.22	25.77	9.15	10.21
A1/9	3	2014	3	1	light yellow	19.3252	4.12574	0.35852	1.35852	33.67	23.99	9.55	9.99
T1/26	1	2013	1	1	light yellow	27.4706	3.68012	0.398927	1.2836	21.4614	38.2218	9.50434	5.72305
T1/26	2	2013	1	1	light yellow	22.1862	3.6926	0.403532	0.995704	23.4845	32.4582	9.06921	6.39618
T1/26	3	2013	1	1	light yellow	26.5472	3.54847	0.45766	1.08536	25.65	36.87	8.98	6.05
T1/26	1	2014	1	1	light yellow	13.4614	3.25396	0.377436	1.09265	30.725	23.131	9.217	9.313
T1/26	2	2014	1	1	light yellow	11.7926	3.81298	0.418605	1.08043	25.2907	18.7984	7.84884	8.75194
T1/26	3	2014	1	1	light yellow	13.2935	3.92438	0.425871	1.29851	34.0299	20.0647	6.16915	9.65174
T1/26	1	2013	2	1	light yellow	34.1723	3.03352	0.402476	1.10572	16.1939	25.6833	5.26044	5.56988
T1/26	2	2013	2	1	light yellow	34.7343	2.71673	0.388583	1.0502	15.1575	19.7835	6.88976	5.11811
T1/26	3	2013	2	1	light yellow	42.33	2.561	0.369	0.9284	14.6	24.4	5	4.1
T1/26	1	2014	2	1	light yellow	11.4986	3.16619	0.246974	1.09894	34.8703	23.3429	9.70221	8.74159
T1/26	2	2014	2	1	light yellow	11.6563	3.32597	0.226596	1.29045	36.4858	24.7955	9.40951	9.94575
T1/26	3	2014	2	1	light yellow	12.763	2.97837	0.248476	1.29794	34.3756	25.3186	9.63618	8.75123
T1/26	1	2013	3	1	light yellow	23.4722	3.13988	0.270238	1.56349	28.8492	32.2024	6.44841	7.8373
T1/26	2	2013	3	1	light yellow	33.4941	3.58594	0.232889	1.40482	33.6583	36.6906	6.73063	8.72242
T1/26	3	2013	3	1	light yellow	20.6984	3.75607	0.252935	1.64069	24.6964	37.3482	6.47773	8.19838
T1/26	1	2014	3	1	light yellow	17.258	3.68354	0.426339	1.15872	40.1966	31.6708	8.45209	7.97789
T1/26	2	2014	3	1	light yellow	17.282	3.434	0.447881	1.3697	37.2913	35.4603	8.28057	8.4754
T1/26	3	2014	3	1	light yellow	17.2321	3.23018	0.500769	1.27727	43.729	32.6766	8.36136	8.16915
A2/127	1	2013	1	1	light yellow	50.1078	2.75882	0.402941	1.24902	23.1373	37.9412	7.2549	5.98039
A2/127	2	2013	1	1	light yellow	44.5633	3.27203	0.332875	1.21884	15.7017	39.4642	5.59372	5.59372
A2/127	3	2013	1	1	light yellow	47.766	2.89864	0.456682	1.14507	20.1715	35.2143	7.46344	5.34544
A2/127	1	2014	1	1	light yellow	14.1752	2.70485	0.573568	0.962898	19.5203	31.816	7.53793	6.36319
A2/127	2	2014	1	1	light yellow	18.1157	3.34536	0.479163	1.04486	25.224	26.62	6.26	6.68
A2/127	3	2014	1	1	light yellow	11.9396	3.08967	0.38538	1.03801	18.5185	28.6706	5.26316	5.75049
A2/127	1	2013	2	1	light yellow	40.1516	3.37241	0.542496	1.5331	14.2496	26.6801	7.19656	7.17534
A2/127	2	2013	2	1	light yellow	32.2134	2.92323	0.431007	1.22054	8.77368	23.0309	6.08175	5.68295
A2/127	3	2013	2	1	light yellow	29.985	3.16758	0.434417	1.27064	10.1036	20.5088	5.0025	6.003
A2/127	1	2014	2	1	light yellow	14.7384	2.86081	0.296644	1.19447	33.8598	24.4817	7.60118	7.20632
A2/127	2	2014	2	1	light yellow	11.9396	3.08967	0.38538	1.03801	28.5185	18.6706	5.26316	5.75049
A2/127	3	2014	2	1	light yellow	17.0857	3.25637	0.34855	1.02587	26.57	20.58	6.89	6.28
A2/127	1	2013	3	1	light yellow	21.3607	3.76163	0.239941	1.66006	14.5864	22.2222	6.42633	8.58003
A2/127	2	2013	3	1	light yellow	21.2346	3.94864	0.254716	1.86469	20.9383	29.4321	5.23457	9.28395
A2/127	3	2013	3	1	light yellow	28.6321	3.70363	0.21171	1.50052	17.2021	23.4197	7.87565	8.0829
A2/127	1	2014	3	1	light yellow	17.6358	3.56244	0.432793	1.06673	48.5129	30.2736	8.19828	6.95901
A2/127	2	2014	3	1	light yellow	14.9365	3.06256	0.566276	1.04985	44.4282	32.8065	9.57967	6.84262
A2/127	3	2014	3	1	light yellow	14.1509	3.00049	0.426521	1.03747	50.3163	30.1703	10.0243	6.90998
A2/99	1	2013	1	1	light yellow	29.4286	3.83448	0.610049	1.01182	31.5271	41.5468	9.75369	4.64532
A2/99	2	2013	1	1	light yellow	29.0015	3.21147	0.49575	0.999795	26.6257	36.5591	10.5719	5.63236
A2/99	3	2013	1	1	light yellow	31.258	3.58727	0.53699	1.08527	29.97	38.54	9.14	4.98
A2/99	1	2014	1	1	light yellow	11.596	3.29204	0.378371	0.836494	17.5322	19.0076	5.05002	4.76417
A2/99	2	2014	1	1	light yellow	10.1128	3.54586	0.386366	0.748504	11.7705	17.694	7.55272	3.53114
A2/99	3	2014	1	1	light yellow	11.7551	3.108	0.43163	0.9865	18.476	20.905	6.09	5.497
A2/99	1	2013	2	1	light yellow	36.2585	3.48499	0.412767	1.64565	12.2981	38.9786	7.14904	6.14904
A2/99	2	2013	2	1	light yellow	48.3575	3.74708	0.420519	1.31003	12.0669	32.5512	9.68547	7.68847
A2/99	3	2013	2	1	light yellow	35.5697	3.89934	0.35534	1.25585	8.07358	30.2054	8.48237	6.54062
A2/99	1	2014	2	1	light yellow	14.8403	3.82998	0.364324	1.41327	53.3661	27.6167	10.7125	9.82801
A2/99	2	2014	2	1	light yellow	16.6303	3.70367	0.404856	1.44995	51.4371	25.9663	11.3974	8.82061
A2/99	3	2014	2	1	light yellow	17.4031	4.27616	0.388469	1.26744	54.0698	23.3527	11.2403	8.04264
A2/99	1	2013	3	1	light yellow	18.5182	2.95124	0.282772	0.956023	24.4742	22.5621	6.13384	5.25813
A2/99	2	2013	3	1	light yellow	14.1549	2.64579	0.228349	0.983926	20.8334	29.74	5.26059	5.16318
A2/99	3	2013	3	1	light yellow	22.0082	3.32275	0.302254	1.08217	19.2623	26.9467	5.22541	5.84016
A2/99	1	2014	3	1	light yellow	11.8102	2.46282	0.392172	1.1135	21.5851	31.9961	7.82779	6.84932
A2/99	2	2014	3	1	light yellow	11.2123	2.44829	0.288867	1.11232	23.7506	25.5319	7.12519	6.63038
A2/99	3	2014	3	1	light yellow	12.2974	2.59281	0.408249	1.13861	28.1055	28.0096	8.78417	7.76978
A3/26	1	2013	1	1	light yellow	45.7999	2.12646	0.262468	1.08873	38.2834	44.581	8.63382	5.48502
A3/26	2	2013	1	1	light yellow	46.5818	2.04992	0.270606	1.12888	35.1126	45.4407	8.0489	5.19613
A3/26	3	2013	1	1	light yellow	46.5818	2.04992	0.270606	1.12888	33.1126	45.4407	8.0489	5.19613
A3/26	1	2014	1	1	light yellow	35.6422	2.56863	0.34025	1.25836	36.25	38.55	9.21	6.98
A3/26	2	2014	1	1	light yellow	33.2581	2.73814	0.368255	1.32255	39.22	40.25	9.99	6.05
A3/26	3	2014	1	1	light yellow	37.8524	2.97422	0.387214	1.29954	40.88	42.88	8.83	5.99
A3/26	1	2013	2	1	light yellow	36.1582	3.78017	0.25085	1.019	21.058	28.8649	8.93683	6.98511
A3/26	2	2013	2	1	light yellow	42.4936	4.17624	0.19673	1.21717	17.0669	21.257	9.36587	7.3582
A3/26	3	2013	2	1	light yellow	34.6013	3.97075	0.24997	1.161	19.2433	21.4779	7.82123	6.19604
A3/26	1	2014	2	1	light yellow	20.5103	4.05594	0.258292	1.32483	45.5348	23.4544	10.052	9.81354
A3/26	2	2014	2	1	light yellow	16.9703	3.57423	0.272577	1.29303	39.4603	18.2172	9.83926	7.89089
A3/26	3	2014	2	1	light yellow	16.8885	3.70254	0.286888	1.45303	49.1194	21.3307	9.78474	8.61057
A3/26	1	2013	3	1	light yellow	22.1266	2.5638	0.24639	1.20119	19.7824	20.6825	5.73689	6.45104
A3/26	2	2013	3	1	light yellow	17.3441	2.88129	0.233622	1.36217	17.8068	20.4225	5.33199	6.74044
A3/26	3	2013	3	1	light yellow	20.0938	2.96979	0.240625	1.48333	18.2292	25.9375	6.79167	7.91667
A3/26	1	2014	3	1	light yellow	17.494	3.80745	0.363135	1.53749	59.7968	40.9289	9.38558	9.48234
A3/26	2	2014	3	1	light yellow	18.6337	3.90988	0.428876	1.51066	55.814	37.0155	9.98062	9.68992
A3/26	3	2014	3	1	light yellow	18.5658	3.69733	0.437587	1.46983	56.3996	40.6528	9.79228	9.0999
A3/29	1	2013	1	1	light yellow	29.1362	3.11992	0.298577	0.999593	13.8943	21.4024	7.0122	3.45528
A3/29	2	2013	1	1	light yellow	22.6261	3.48777	0.308937	0.723814	15.3769	18.0729	8.38742	4.39341
A3/29	3	2013	1	1	light yellow	21.8648	2.93648	0.246414	0.826127	14.0369	17.5205	6.14754	3.07377
A3/29	1	2014	1	1	light yellow	13.6497	1.97162	0.296869	0.700587	25.342	9.589	5.871	5.773
A3/29	2	2014	1	1	light yellow	9.77044	2.36601	0.369754	0.823251	26.8966	8.867	4.72906	5.41872
A3/29	3	2014	1	1	light yellow	11.9088	2.05949	0.323946	0.880813	24.4621	10.289	4.67724	6.14774
A3/29	1	2013	2	1	light yellow	30.0678	1.40949	0.371539	0.923717	24.453	11.6805	4.74347	5.51791
A3/29	2	2013	2	1	light yellow	41.1914	1.81055	0.35957	1.2168	18.2617	17.6758	4.78516	3.90625
A3/29	3	2013	2	1	light yellow	35.8963	2.00587	0.30321	1.15836	22.54	14.25	5.01	4.89
A3/29	1	2014	2	1	light yellow	11.0681	2.20976	0.253939	1.01112	36.1527	18.6564	6.24	5.89657
A3/29	2	2014	2	1	light yellow	15.4289	2.50818	0.398314	1.26425	55.1314	26.58	7.53594	7.73426
A3/29	3	2014	2	1	light yellow	11.3584	2.96527	0.35729	1.12832	49.55	23.54	5.98	6.38
A3/29	1	2013	3	1	light yellow	25.3666	3.88187	0.441344	1.14216	21.1609	32.6884	10.0081	6.4053
A3/29	2	2013	3	1	light yellow	24.3214	3.79042	0.388882	1.29641	23.6527	33.1677	9.18164	7.58483
A3/29	3	2013	3	1	light yellow	19.248	3.5376	0.303049	1.01931	21.4431	30.4878	11.5854	5.26829
A3/29	1	2014	3	1	light yellow	18.7482	3.5198	0.522347	1.2401	39.6112	29.1443	8.01956	6.45477
A3/29	2	2014	3	1	light yellow	19.8834	3.86492	0.478328	1.29446	37.8037	23.3431	9.71817	7.09427
A3/29	3	2014	3	1	light yellow	15.3362	3.03195	0.428612	1.03386	47.3057	24.0749	7.86695	5.24559
A3/37	1	2013	1	1	light yellow	17.2255	2.26863	0.29	0.811176	13.0392	26.7647	6.86275	4.80392
A3/37	2	2013	1	1	light yellow	22.7255	2.90783	0.407235	0.954708	13.4787	23.3895	7.53221	5.55005
A3/37	3	2013	1	1	light yellow	17.6605	2.46377	0.313043	0.763768	10.7039	30.0911	7.66046	4.86542
A3/37	1	2014	1	1	light yellow	8.35519	2.2202	0.271326	0.736237	38.382	11.4888	6.74438	6.12733
A3/37	2	2014	1	1	light yellow	11.9429	2.07309	0.336547	0.660797	39.449	15.804	7.477	6.296
A3/37	3	2014	1	1	light yellow	12.1906	2.47348	0.274951	0.82554	32.22	14.342	8.841	7.564
A3/37	1	2013	2	1	light yellow	31.9442	3.29066	0.445332	1.17998	8.18094	28.1039	6.54475	5.00481
A3/37	2	2013	2	1	light yellow	22.9796	3.84213	0.37449	1.25353	13.0319	24.7412	7.73654	6.48197
A3/37	3	2013	2	1	light yellow	33.4063	3.65724	0.475236	1.20636	15.0174	32.2228	8.43	6.96171
A3/37	1	2014	2	1	light yellow	13.2246	2.69482	0.21929	1.15739	33.7812	27.856	10.4607	8.06142
A3/37	2	2014	2	1	light yellow	13.4787	2.94574	0.363081	1.0562	32.1318	30.0388	9.39922	7.55814
A3/37	3	2014	2	1	light yellow	13.3565	3.1532	0.473575	1.01735	29.1522	35.7957	8.44	6.04859
A3/37	1	2013	3	1	light yellow	17.3192	3.51013	0.340694	1.36172	20.0289	14.0791	6.55738	4.33944
A3/37	2	2013	3	1	light yellow	26.9472	3.843	0.471832	1.41303	20.8312	18.6762	8.82504	5.64597
A3/37	3	2013	3	1	light yellow	20.509	3.01397	0.431737	1.33533	26.1477	16.5469	6.28743	6.58683
A3/37	1	2014	3	1	light yellow	14.7146	2.65256	0.324409	1.36319	40.9449	36.122	6.00394	6.98819
A3/37	2	2014	3	1	light yellow	15.2253	2.78811	0.373154	1.4976	33.7488	42.5695	6.51965	7.5743
A3/37	3	2014	3	1	light yellow	18.7533	2.98574	0.30678	1.4872	36.57	38.57	7.05	7.25
A3/164	1	2013	1	1	light yellow	37.919	2.10456	0.238134	0.815684	18.8621	33.9313	7.79088	4.61302
A3/164	2	2013	1	1	light yellow	22.4648	1.83018	0.195633	0.78525	19.8933	26.2009	8.53954	6.69578
A3/164	3	2013	1	1	light yellow	23.7549	2.3049	0.279314	0.755098	13.6275	21.9608	6.96078	5.29412
A3/164	1	2014	1	1	light yellow	14.0859	2.85962	0.388326	1.04293	35.408	13.796	9.156	9.648
A3/164	2	2014	1	1	light yellow	10.9512	2.5381	0.313159	0.966387	28.783	17.348	9.069	8.689
A3/164	3	2014	1	1	light yellow	13.2487	2.95457	0.321055	0.976649	25.012	18.368	10.747	9.575
A3/164	1	2013	2	1	light yellow	38.3054	1.23054	0.331492	1.22652	21.6976	31.9437	8.53842	7.333
A3/164	2	2013	2	1	light yellow	40.3249	1.07005	0.383046	1.14619	18.3299	29.5431	8.12183	6.29442
A3/164	3	2013	2	1	light yellow	40.4492	1.42241	0.327667	1.08525	15.9265	23.3793	7.35069	7.96325
A3/164	1	2014	2	1	light yellow	12.778	2.73885	0.217148	1.07594	44.586	24.9878	8.03528	8.03528
A3/164	2	2014	2	1	light yellow	12.688	3.05725	0.374939	1.09779	34.398	32.5307	7.86241	7.07617
A3/164	3	2014	2	1	light yellow	14.6304	2.81615	0.253016	0.932004	39.4747	27.7043	7.97665	6.80934
A3/164	1	2013	3	1	light yellow	22.1708	3.11008	0.245267	1.43107	24.5885	26.8724	5.7037	7.71605
A3/164	2	2013	3	1	light yellow	17.8659	3.21037	0.230894	1.34654	27.8455	28.8618	6.19919	7.72358
A3/164	3	2013	3	1	light yellow	21.9086	3.41964	0.267202	1.64942	27.7248	27.122	7.03164	8.0452
A3/164	1	2014	3	1	light yellow	14.135	3.01725	0.43105	1.09512	33.514	30.2612	9.65993	7.09709
A3/164	2	2014	3	1	light yellow	14.5455	3.14953	0.397615	1.12568	36.2643	30.1043	9.23994	7.94834
A3/164	3	2014	3	1	light yellow	14.6878	3.25669	0.479286	1.15164	35.9762	31.4172	9.71259	7.13578
A3/167	1	2013	1	1	light yellow	24.1404	2.18173	0.300407	0.88942	25.3306	31.1292	8.44354	4.37436
A3/167	2	2013	1	1	light yellow	36.5441	2.3063	0.216826	0.785491	33.5516	30	6.74307	4.63476
A3/167	3	2013	1	1	light yellow	41.4455	2.04956	0.209809	0.890862	23.2163	32.6278	7.64068	4.64636
A3/167	1	2014	1	1	light yellow	11.3697	2.5324	0.285911	0.635542	8.14924	9.5891	5.45459	3.14188
A3/167	2	2014	1	1	light yellow	11.6731	2.42308	0.321538	0.585481	11.6346	8.11538	4.44231	4.71154
A3/167	3	2014	1	1	light yellow	8.39924	2.74035	0.257932	0.7293	13.3888	10.9576	3.62077	5.71701
A3/167	1	2013	2	1	light yellow	32.7604	2.89062	0.372396	1.02604	13.125	20.4167	6.97917	6.77083
A3/167	2	2013	2	1	light yellow	31.4835	3.19949	0.326127	0.897114	16.9873	14.1772	7.18987	5.46835
A3/167	3	2013	2	1	light yellow	43.6928	3.57853	0.355096	0.943476	13.2939	16.3466	6.20384	5.2191
A3/167	1	2014	2	1	light yellow	10.2802	2.43478	0.203575	1.0942	38.8406	21.8357	8.4058	8.11594
A3/167	2	2014	2	1	light yellow	14.1771	2.97036	0.297209	1.15496	40.5852	17.3244	8.75842	8.27719
A3/167	3	2014	2	1	light yellow	12.7334	2.64389	0.2923	1.15399	42.0597	21.2705	9.23965	8.85467
A3/167	1	2013	3	1	light yellow	22.5691	2.30761	0.313718	1.10519	19.1129	19.1953	7.36791	6.3015
A3/167	2	2013	3	1	light yellow	26.2941	2.91843	0.200101	1.2004	17.4924	19.7382	8.12689	6.143
A3/167	3	2013	3	1	light yellow	18.7205	2.73728	0.233456	1.2732	18.0388	22.2339	6.03408	6.60724
A3/167	1	2014	3	1	light yellow	12.6123	2.89778	0.385778	1.1763	35.0617	27.9506	8.59259	6.81481
A3/167	2	2014	3	1	light yellow	12.5501	2.83381	0.368386	1.14804	37.8892	30.1815	7.92741	6.39924
A3/167	3	2014	3	1	light yellow	13.1998	2.80019	0.378445	1.16929	42.0601	34.3348	8.01144	6.6762
A3/177	1	2013	1	1	light yellow	15.6863	3.08316	0.488286	0.724585	11.3625	19.7084	5.02765	4.9271
A3/177	2	2013	1	1	light yellow	22.5511	3.14216	0.374586	0.937585	15.5794	23.8559	8.56865	6.52386
A3/177	3	2013	1	1	light yellow	17.5843	3.2572	0.43574	0.85721	13.29	21.08	7.51	5.27
A3/177	1	2014	1	1	light yellow	10.207	2.41738	0.332031	0.780469	26.816	18.262	8.844	6.086
A3/177	2	2014	1	1	light yellow	9.75799	2.11617	0.367861	0.880058	21.297	12.682	9.487	7.26
A3/177	3	2014	1	1	light yellow	9.18719	2.06502	0.373202	0.660591	23.842	15.429	10.433	5.123
A3/177	1	2013	2	1	light yellow	47.8649	2.74805	0.405506	1.39636	23.0649	18.1299	9.35065	7.2987
A3/177	2	2013	2	1	light yellow	41.152	2.92994	0.341463	1.02325	23.2486	13.4925	8.51064	6.85003
A3/177	3	2013	2	1	light yellow	42.1429	2.35519	0.437182	1.26517	20.9589	15.0685	10.8611	8.12133
A3/177	1	2014	2	1	light yellow	11.7731	3.66826	0.513251	1.30029	42.612	20.5891	9.34223	10.1516
A3/177	2	2014	2	1	light yellow	14.4895	3.58867	0.671519	1.44113	44.4895	21.0581	10.19	11.0405
A3/177	3	2014	2	1	light yellow	16.7873	3.87407	0.559445	1.38126	45.0174	23.8969	9.69212	11.0064
A3/177	1	2013	3	1	light yellow	21.6198	2.69235	0.428741	1.42321	30.6173	19.9506	7.60494	7.30864
A3/177	2	2013	3	1	light yellow	22.0978	2.25366	0.377105	1.11649	27.0298	16.4397	6.25315	5.95058
A3/177	3	2013	3	1	light yellow	25.8741	2.78514	0.40847	1.35708	32.11	17.28	8.91	6.55
A3/177	1	2014	3	1	light yellow	21.4257	3.99601	0.357527	1.27916	44.9751	39.669	10.2602	6.97906
A3/177	2	2014	3	1	light yellow	20.8533	4.14094	0.467114	1.30777	44.813	36.1457	9.03931	7.09492
A3/177	3	2014	3	1	light yellow	20.5763	4.18082	0.508942	1.35122	46.3686	34.0785	8.90959	7.35221
A3/189	1	2013	1	1	light yellow	21.9902	2.20088	0.390882	0.983333	13.9216	30.098	7.84314	4.5098
A3/189	2	2013	1	1	light yellow	23.7561	2.86634	0.396293	0.932293	17.1707	30.2439	8.58537	4.19512
A3/189	3	2013	1	1	light yellow	20.2287	2.30731	0.468523	0.742616	15.7136	28.4764	6.66335	4.77374
A3/189	1	2014	1	1	light yellow	13.7633	2.63725	0.210378	0.848788	20.8632	21.0669	9.87294	6.10378
A3/189	2	2014	1	1	light yellow	16.3062	2.71388	0.382775	0.994258	28.038	17.928	9.014	7.273
A3/189	3	2014	1	1	light yellow	10.6124	2.16364	0.466928	0.829789	24.586	19.304	8.035	7.937
A3/189	1	2013	2	1	light yellow	30.8221	3.00269	0.285102	0.958645	9.36721	23.7275	6.47733	4.58396
A3/189	2	2013	2	1	light yellow	33.198	2.50099	0.410891	1.01188	10.2376	28.6139	7.80198	6.93069
A3/189	3	2013	2	1	light yellow	27.4591	2.7895	0.372561	0.838435	9.31154	25.3591	6.14165	5.5473
A3/189	1	2014	2	1	light yellow	12.7039	2.98695	0.313198	0.934948	19.1201	26.2976	8.20564	6.22837
A3/189	2	2014	2	1	light yellow	11.5932	3.0937	0.210847	1.08281	25.1816	29.1525	7.55448	6.87651
A3/189	3	2014	2	1	light yellow	14.3238	2.76111	0.354097	1.08095	25.4195	27.542	9.57552	6.41658
A3/189	1	2013	3	1	light yellow	35.0394	2.87598	0.26063	1.21161	18.0118	13.878	6.98819	6.39764
A3/189	2	2013	3	1	light yellow	25.2462	3.23647	0.326865	1.32404	16.7723	19.0151	7.41102	6.72843
A3/189	3	2013	3	1	light yellow	28.939	2.62072	0.251314	1.15915	21.7154	19.9306	5.36292	5.06544
A3/189	1	2014	3	1	light yellow	21.4584	3.02541	0.35823	1.32536	19.36	20.33	7.21	5.51
A3/189	2	2014	3	1	light yellow	25.3687	3.287	0.347655	1.20533	23.55	21.54	6.99	5.99
A3/189	3	2014	3	1	light yellow	29.8741	3.47884	0.30214	1.20402	24.88	23.94	7.68	6.11
A3/234	1	2013	1	1	light yellow	23.5949	2.49671	0.391038	0.992	18.0253	27.7468	6.88608	6.17722
A3/234	2	2013	1	1	light yellow	20.6263	2.77207	0.320123	1.02772	15.4004	24.4353	6.98152	7.49487
A3/234	3	2013	1	1	light yellow	28.4312	2.70961	0.273039	1.1813	16.1039	23.2208	7	9.03896
A3/234	1	2014	1	1	light yellow	13.2284	2.78236	0.250691	0.846161	29.7282	10.2861	5.14	6.81784
A3/234	2	2014	1	1	light yellow	14.1371	2.27487	0.29966	0.865921	30.044	11.57	6.82	8.653
A3/234	3	2014	1	1	light yellow	19.8742	2.58722	0.25833	0.90241	25.17	12	7.87	7.28
A3/234	1	2013	2	1	light yellow	32.0503	4.05628	0.39407	1.12764	11.3568	15.7789	7.9397	5.82915
A3/234	2	2013	2	1	light yellow	38.8094	3.65915	0.320691	0.961114	14.6904	13.5382	7.16	5.18483
A3/234	3	2013	2	1	light yellow	35.8741	3.87524	0.35021	1.08732	12.09	18.57	8.65	6.08
A3/234	1	2014	2	1	light yellow	16.6476	3.15282	0.472779	0.870296	34.575	24.4508	10.6017	6.02865
A3/234	2	2014	2	1	light yellow	12.4719	2.8233	0.435242	0.967499	34.1654	28.3896	7.04846	7.34214
A3/234	3	2014	2	1	light yellow	15.6569	3.03431	0.430098	0.779314	30.3137	31.5882	9.60784	5.68627
A3/234	1	2013	3	1	light yellow	20.3924	3.29678	0.153219	1.21509	20.9256	18.9135	7.54527	8.14889
A3/234	2	2013	3	1	light yellow	24.3939	3.76465	0.111515	1.08889	20	12.1212	7.37374	6.56566
A3/234	3	2013	3	1	light yellow	22.5474	3.58718	0.13522	1.35802	18.27	15.57	8.02	7.27
A3/234	1	2014	3	1	light yellow	21.9263	5.23145	0.277002	1.73464	41.2776	48.4521	11.3022	10.7125
A3/234	2	2014	3	1	light yellow	22.8696	5.0599	0.32029	1.7256	44.5411	48.1159	10.7246	10.628
A3/234	3	2014	3	1	light yellow	23.1842	5.10342	0.363155	1.70082	42.1356	47.5277	10.7744	10.582
A3/275	1	2013	1	1	light yellow	42.8209	3.61339	0.211872	0.967428	21.106	46.6768	9.13242	4.46474
A3/275	2	2013	1	1	light yellow	38.6357	3.59173	0.283307	0.902532	20.0517	40.5168	8.68217	5.5814
A3/275	3	2013	1	1	light yellow	40.1005	3.18392	0.199397	0.88794	20.9045	44.2211	8.84422	5.42714
A3/275	1	2014	1	1	light yellow	13.9943	3.21973	0.41163	1.398	33.27	17.255	10.296	7.054
A3/275	2	2014	1	1	light yellow	14.8467	3.69139	0.430168	1.26113	34.125	21.365	10.56	8.781
A3/275	3	2014	1	1	light yellow	9.82704	3.07455	0.457256	1.00795	30.9563	14.4135	9.25	7.95229
A3/275	1	2013	2	1	light yellow	20.2432	2.72101	0.281323	1.00798	10.4786	26.2646	8.56031	6.51751
A3/275	2	2013	2	1	light yellow	22.432	2.21666	0.288087	0.989619	8.3045	22.0613	7.93	5.14088
A3/275	3	2013	2	1	light yellow	27.7876	2.56539	0.154179	0.90885	11.9646	18.0924	6.98132	5.11308
A3/275	1	2014	2	1	light yellow	11.9473	2.67545	0.232113	1.35871	29.3821	30.1611	7.61347	9.15129
A3/275	2	2014	2	1	light yellow	12.9787	2.79342	0.209865	1.32302	30.8685	26.8279	7.54352	8.9942
A3/275	3	2014	2	1	light yellow	13.9151	3.09123	0.25608	1.23605	34.7163	25.5603	8.58369	9.91893
A3/275	1	2013	3	1	light yellow	22.0554	3.64627	0.448948	1.26386	13.3652	26.673	6.30975	6.69216
A3/275	2	2013	3	1	light yellow	16.7935	3.65864	0.385481	1.3221	15.9846	24.3621	6.25903	6.6442
A3/275	3	2013	3	1	light yellow	24.3323	3.50346	0.306726	1.39565	16.7161	22.453	7.11	7.91296
A3/275	1	2014	3	1	light yellow	19.8849	3.88777	0.320144	1.47338	38.8489	29.7362	9.78417	8.05755
A3/275	2	2014	3	1	light yellow	20.4712	3.80288	0.323462	1.44423	36.1538	26.25	10.3846	8.26923
A3/275	3	2014	3	1	light yellow	20.0198	3.80952	0.329464	1.43452	30.631	32.6389	9.4246	8.03571
A3/321	1	2013	1	1	light yellow	31.7966	3.00465	0.355808	1.07692	17.7594	22.4058	9.49923	6.64636
A3/321	2	2013	1	1	light yellow	37.4693	2.80246	0.211373	1.16291	20.6967	23.1557	9.73361	6.25
A3/321	3	2013	1	1	light yellow	33.0325	2.6714	0.294219	0.906795	17.14	25.57	8.21501	6.28803
A3/321	1	2014	1	1	light yellow	10.154	2.80077	0.379307	1.33109	26.4293	35.6112	8.82	8.85467
A3/321	2	2014	1	1	light yellow	11.2524	2.92955	0.381311	1.10176	20.7436	32.0352	6.16438	7.4364
A3/321	3	2014	1	1	light yellow	10.9239	2.35232	0.241838	1.23748	16.9459	28.9038	7.93	6.69124
A3/321	1	2013	2	1	light yellow	45.7465	3.2786	0.355003	1.2273	26.2699	29.3484	10.6721	6.72242
A3/321	2	2013	2	1	light yellow	40.7885	3.43847	0.26218	1.29985	29.332	24.2089	9.53	6.73029
A3/321	3	2013	2	1	light yellow	43.3056	3.30465	0.395892	1.30465	28.0196	22.5917	8.99756	6.94377
A3/321	1	2014	2	1	light yellow	14.6915	3.24438	0.297944	1.6803	40.2678	19.7991	11.6691	6.98231
A3/321	2	2014	2	1	light yellow	12.3697	3.04012	0.290167	1.51622	42.1829	21.5339	9.53786	8.16126
A3/321	3	2014	2	1	light yellow	17.14	3.53866	0.276331	1.77811	37.2781	24.6154	10.39	7.2288
A3/321	1	2013	3	1	light yellow	20.2699	3.55562	0.210445	1.68216	19.4928	13.2934	8.7	7.09645
A3/321	2	2013	3	1	light yellow	18.0822	3.23581	0.233855	1.57613	21.5264	16.6341	9.68689	6.75147
A3/321	3	2013	3	1	light yellow	25.3004	3.74255	0.283291	1.78597	24.0283	20.7254	7.26906	8.59112
A3/321	1	2014	3	1	light yellow	11.0014	3.34586	0.243699	1.47714	41.1116	27.6703	8.23	9.12075
A3/321	2	2014	3	1	light yellow	16.6124	3.68804	0.3889	1.61053	33.7799	30.7656	9.1866	9.2823
A3/321	3	2014	3	1	light yellow	15.2027	3.78017	0.339179	1.57303	34.7826	32.0469	7.53	9.47728
A3/337	1	2013	1	1	light yellow	24.4128	3.03759	0.332973	1.0172	22.9975	38.231	9.82801	6.68305
A3/337	2	2013	1	1	light yellow	20.8935	3.4541	0.401375	0.9784	19.0476	26.8041	9.81836	5.00736
A3/337	3	2013	1	1	light yellow	26.5473	2.95305	0.32677	1.00527	21.08	32.54	10.2	5.87
A3/337	1	2014	1	1	light yellow	13.3169	2.66732	0.605323	0.903992	50.37	22.178	10.054	7.886
A3/337	2	2014	1	1	light yellow	16.1553	3.05753	0.545446	1.05024	42.953	20.614	11.505	9.684
A3/337	3	2014	1	1	light yellow	15.4294	3.59625	0.527542	0.996051	42.0563	23.6525	9.84	8.71273
A3/337	1	2013	2	1	light yellow	43.8838	5.80632	0.561978	1.37513	27.0234	37.5025	11.4169	8.56269
A3/337	2	2013	2	1	light yellow	40.6859	5.56819	0.649304	1.28131	23.1213	31.6103	10.67	8.2505
A3/337	3	2013	2	1	light yellow	43.9674	5.35504	0.503459	1.57884	25.6205	33.469	12.9196	8.91963
A3/337	1	2014	2	1	light yellow	13.8303	3.01128	0.205002	0.927023	46.6945	27.4644	9.90682	6.08141
A3/337	2	2014	2	1	light yellow	11.8055	3.35099	0.299856	0.99663	48.6278	28.8878	8.9	7.97015
A3/337	3	2014	2	1	light yellow	14.3083	3.02174	0.225889	1.00652	40.4862	25.6917	9.78261	8.59684
A3/337	1	2013	3	1	light yellow	18.4077	3.07674	0.362158	1.29496	17.6499	15.9233	7.96163	7.67386
A3/337	2	2013	3	1	light yellow	25.9305	3.42561	0.316589	1.1436	19.6993	19.4785	6.53188	5.18403
A3/337	3	2013	3	1	light yellow	23.7983	3.58415	0.4263	1.24241	23.0865	17.895	7.41122	6.83788
A3/337	1	2014	3	1	light yellow	21.3793	4.33317	0.501797	1.41136	41.865	29.2375	10.72	8.83924
A3/337	2	2014	3	1	light yellow	20.8502	4.29662	0.48599	1.40483	41.3527	31.4976	9.46	8.98551
A3/337	3	2014	3	1	light yellow	19.9123	4.01754	0.496784	1.32749	42.7875	28.0702	11.6959	8.2846
T4/4	1	2013	1	1	light yellow	26.175	2.40895	0.331526	1.00773	16.6836	34.6897	8.34181	5.1882
T4/4	2	2013	1	1	light yellow	22.7163	2.58941	0.232617	0.926481	14.473	26.9119	7.2365	5.8731
T4/4	3	2013	1	1	light yellow	22.8173	2.69866	0.339319	1.01135	18.807	29.8246	8.97833	5.15996
T4/4	1	2014	1	1	light yellow	25.8742	2.85612	0.4542	1.14794	20.21	25.87	6.99	6.25
T4/4	2	2014	1	1	light yellow	28.7453	3.02588	0.409745	1.08932	21.88	31.25	7.25	6.95
T4/4	3	2014	1	1	light yellow	30.214	3.247	0.389248	1.25487	24.77	28.24	8.06	5.99
T4/4	1	2013	2	1	light yellow	23.2389	4.25304	0.166093	1.34413	14.1741	32.004	8.70445	5.97166
T4/4	2	2013	2	1	light yellow	31.2668	3.85618	0.190611	1.20119	13.3135	26.7263	8.54446	5.56384
T4/4	3	2013	2	1	light yellow	20.525	3.44032	0.127241	1.15894	13.472	28.2407	8.66	5.95295
T4/4	1	2014	2	1	light yellow	15.1231	2.69338	0.292033	1.03525	25.7001	20.2801	8.30517	6.56688
T4/4	2	2014	2	1	light yellow	11.3359	2.39218	0.23416	0.979008	25.2863	16.0305	7.34733	6.39313
T4/4	3	2014	2	1	light yellow	13.2971	2.7217	0.212259	1.03905	22.3895	19.476	7.217	5.83292
T4/4	1	2013	3	1	light yellow	22.9812	2.94665	0.386402	1.22071	16.318	17.9916	7.00837	5.96234
T4/4	2	2013	3	1	light yellow	29.7347	3.08469	0.386735	1.02245	21.6327	17.9592	7.2449	4.89796
T4/4	3	2013	3	1	light yellow	21.998	2.86449	0.317112	1.17092	20.4748	16.815	6.64	4.54995
T4/4	1	2014	3	1	light yellow	15.8727	3.44552	0.483028	1.5188	46.2874	38.8621	9.13	9.31823
T4/4	2	2014	3	1	light yellow	16.4921	3.38933	0.569269	1.49506	44.5652	37.9447	8.10277	9.48617
T4/4	3	2014	3	1	light yellow	16.1886	3.28051	0.368012	1.42829	39.8493	33.8503	8.26446	9.04229
T6/3	1	2013	1	1	light yellow	32.456	3.91295	0.231606	0.84	20.6218	39.8446	9.11917	6.73575
T6/3	2	2013	1	1	light yellow	34.7952	3.44156	0.225774	0.823077	21.7782	46.8432	8.29171	6.59341
T6/3	3	2013	1	1	light yellow	38.9463	3.79082	0.291721	0.977421	19.8695	37.5966	9.13196	6.82388
T6/3	1	2014	1	1	light yellow	11.7522	3.00871	0.287899	0.875992	39.787	13.485	4.77541	7.1636
T6/3	2	2014	1	1	light yellow	8.43759	2.94331	0.265341	0.821979	34.9727	11.3923	5.29836	6.58031
T6/3	3	2014	1	1	light yellow	9.4569	2.60345	0.377299	0.822318	31.9349	14.6552	6.89655	6.70498
T6/3	1	2013	2	1	light yellow	21.5159	3.0229	0.218819	1.039	28.0188	13.3821	7.63199	5.95923
T6/3	2	2013	2	1	light yellow	35.2514	2.39502	0.23148	1.19036	20.0104	20.0207	8.26439	7.05029
T6/3	3	2013	2	1	light yellow	30.8076	2.90319	0.17788	0.975075	23.5593	18.4447	7.27817	6.58026
T6/3	1	2014	2	1	light yellow	9.08538	2.61825	0.31315	1.05888	58.9794	31.3052	7.0844	7.85083
T6/3	2	2014	2	1	light yellow	12.4174	2.52274	0.278506	0.991862	41.6467	26.5629	8.52082	6.98899
T6/3	3	2014	2	1	light yellow	10.8202	2.28458	0.284585	0.925889	50.2767	24.5059	9.28854	7.31225
T6/3	1	2013	3	1	light yellow	18.0711	3.03147	0.225787	1.43858	25.8883	24.1624	5.48223	8.22335
T6/3	2	2013	3	1	light yellow	20.1472	2.85714	0.32521	1.32574	20.25	22.57	6.25	8.99
T6/3	3	2013	3	1	light yellow	22.574	2.6471	0.29825	1.24735	22.22	20.85	7.65	9.15
T6/3	1	2014	3	1	light yellow	14.4559	2.32496	0.366027	1.09798	30.0345	20.6795	5.90842	6.59774
T6/3	2	2014	3	1	light yellow	14.1979	2.94621	0.308838	1.00672	36.3112	22.2863	7.4928	5.76369
T6/3	3	2014	3	1	light yellow	13.8086	2.63541	0.255981	1.18756	24.0191	19.0431	5.74163	7.17703
T6/17	1	2013	1	1	light yellow	34.9436	2.83282	0.218051	1.07897	20.8205	25.8718	8	7.38462
T6/17	2	2013	1	1	light yellow	36.2249	2.55183	0.21934	1.07788	21.3512	23.1377	7.01392	7.73595
T6/17	3	2013	1	1	light yellow	31.9651	2.12519	0.256309	0.988329	19.5511	30.3242	7.18204	6.08479
T6/17	1	2014	1	1	light yellow	13.6368	3.10817	0.112873	1.18257	8.09104	34.7528	4.81057	8.41899
T6/17	2	2014	1	1	light yellow	12.2943	3.32817	0.137561	1.01162	11.5198	32.8074	4.93708	8.03485
T6/17	3	2014	1	1	light yellow	12.5283	3.63135	0.130803	0.977378	9.36422	33.9428	4.73139	7.89995
T6/17	1	2013	2	1	light yellow	30.6853	4.65347	0.234556	1.3861	11.0039	18.6293	6.71429	7.23938
T6/17	2	2013	2	1	light yellow	32.7541	4.5621	0.268827	1.14973	17.0913	26.8189	7.85469	7.1674
T6/17	3	2013	2	1	light yellow	38.858	4.52263	0.293724	1.18519	15.7078	17.0782	5.04115	7.71605
T6/17	1	2014	2	1	light yellow	16.6995	3.61478	0.389557	1.34286	40.8374	23.1527	8.867	9.16256
T6/17	2	2014	2	1	light yellow	13.9453	3.38574	0.353125	1.35742	47.2266	24.5117	10.6445	9.375
T6/17	3	2014	2	1	light yellow	9.86515	3.0352	0.370848	1.34556	44.7248	30.2092	9.2469	8.52752
T6/17	1	2013	3	1	light yellow	23.8522	3.71133	0.342759	1.25567	23.2512	35.1724	8.30049	8.76847
T6/17	2	2013	3	1	light yellow	22.5389	3.36478	0.370497	1.39187	22.8801	28.1987	9.60361	8.2288
T6/17	3	2013	3	1	light yellow	20.0206	3.60268	0.321362	1.48916	16.4087	33.0671	7.32714	8.46233
T6/17	1	2014	3	1	light yellow	16.4032	3.69565	0.406324	1.41502	31.917	27.9644	8.00395	7.00395
T6/17	2	2014	3	1	light yellow	14.7353	3.53171	0.377396	1.44397	32.742	26.9909	6.96233	6.19933
T6/17	3	2014	3	1	light yellow	16.0848	3.59961	0.495661	1.49901	39.3491	31.1637	7.00197	6.1144
A6/71	1	2013	1	1	light yellow	31.8511	2.83056	0.313222	1.04897	13.6141	24.7796	6.17042	5.28893
A6/71	2	2013	1	1	light yellow	29.3622	2.33433	0.278525	1.08719	8.86896	29.4968	4.98256	4.98256
A6/71	3	2013	1	1	light yellow	31.853	2.80564	0.249043	0.960826	10.1712	23.7664	5.33031	5.23666
A6/71	1	2014	1	1	light yellow	10.6637	3.15784	0.281863	0.86451	23.1373	12.6667	2.05882	5.60784
A6/71	2	2014	1	1	light yellow	12.2637	3.11197	0.232283	0.707901	20.9404	9.5618	4.55114	6.10761
A6/71	3	2014	1	1	light yellow	15.1901	3.21482	0.386173	0.917037	23.481	16.494	3.284	7.198
A6/71	1	2013	2	1	light yellow	36.9604	3.00297	0.402277	1.38614	7.22772	24.5545	6.93069	5.14851
A6/71	2	2013	2	1	light yellow	34.3265	2.99286	0.389898	1.22449	10.5102	22.551	8.36735	6.32653
A6/71	3	2013	2	1	light yellow	39.3707	2.73255	0.322812	1.3117	13.2743	20.354	9.53786	5.60472
A6/71	1	2014	2	1	light yellow	13.3758	2.90544	0.251935	0.962763	44.684	19.2063	7.25135	6.76139
A6/71	2	2014	2	1	light yellow	13.2031	2.62988	0.200195	1.03027	42.9102	29.0039	7.32422	7.03125
A6/71	3	2014	2	1	light yellow	15.878	3.12425	0.21436	1.02532	40.27	25.87	8.014	7.55
A6/71	1	2013	3	1	light yellow	19.1241	2.98881	0.361314	1.59221	17.8102	23.5523	9.24574	6.02433
A6/71	2	2013	3	1	light yellow	22.7321	3.41274	0.395236	1.44677	17.404	20.6125	8.896	5.54205
A6/71	3	2013	3	1	light yellow	23.5871	3.21454	0.30814	1.32521	17.77	26.58	7.578	7.84
A6/71	1	2014	3	1	light yellow	18.5742	2.85427	0.35412	1.25425	21.54	28.68	6.66	7.55
A6/71	2	2014	3	1	light yellow	20.5141	3.01499	0.38933	1.12307	20.8	30.25	8.88	6.24
A6/71	3	2014	3	1	light yellow	17.8423	3.14771	0.298874	1.03685	23.47	33.64	7.274	6.98
A6/103	1	2013	1	1	light yellow	26.369	3.82669	0.315898	0.957507	16.9774	21.7861	6.86948	5.88813
A6/103	2	2013	1	1	light yellow	30.5595	4.01322	0.271007	0.903052	19.8566	27.8128	6.40895	5.90031
A6/103	3	2013	1	1	light yellow	29.921	3.59753	0.370432	0.870617	14.8148	21.7284	5.23457	5.53086
A6/103	1	2014	1	1	light yellow	10.555	3.13632	0.266212	0.760078	19.114	11.587	7.887	6.719
A6/103	2	2014	1	1	light yellow	11.3048	2.83101	0.307944	0.680886	13.6736	10.0963	6.63698	7.81464
A6/103	3	2014	1	1	light yellow	11.4749	3.49459	0.390855	0.973746	20.8456	14.9459	7.9646	8.16126
A6/103	1	2013	2	1	light yellow	32.8643	2.97405	0.259082	1.32934	12.7745	20.7585	9.98004	6.18762
A6/103	2	2013	2	1	light yellow	28.7463	3.20274	0.309696	1.1048	11.9491	10.382	8.97453	5.28893
A6/103	3	2013	2	1	light yellow	30.5879	3.14727	0.28633	1.25831	10.88	15.25	7.85	5.87
A6/103	1	2014	2	1	light yellow	13.5825	2.3466	0.33699	1.14951	45.3398	29.4175	7.37864	6.21359
A6/103	2	2014	2	1	light yellow	9.51036	2.49253	0.37812	0.914699	40.8675	20.7229	6.68675	5.78313
A6/103	3	2014	2	1	light yellow	12.0868	2.55254	0.410849	1.10705	48.15	24.371	8.38678	6.90676
A6/103	1	2013	3	1	light yellow	17.5668	3.09199	0.296696	1.25045	17.8042	20.8042	7.81405	6.53907
A6/103	2	2013	3	1	light yellow	20.8153	3.26523	0.260815	1.32086	15.6355	25.6115	6.71463	7.57794
A6/103	3	2013	3	1	light yellow	23.0079	3.58005	0.204042	1.44252	14.4698	27.2362	7.45407	7.87402
A6/103	1	2014	3	1	light yellow	19.3193	4.19942	0.311697	1.3906	44.1035	33.3653	10.8341	5.35475
A6/103	2	2014	3	1	light yellow	22.7767	3.99046	0.325382	1.20515	33.9504	31.1069	9.05725	4.29389
A6/103	3	2014	3	1	light yellow	21.9415	4.24585	0.351024	1.15415	37.6585	31.2195	8.87805	6.04878
A6/119	1	2013	1	1	light yellow	22.7565	2.22767	0.355641	0.934354	21.2353	22.8188	10.7198	5.37162
A6/119	2	2013	1	1	light yellow	20.1899	2.97751	0.345927	0.844278	23.0885	25.6872	9.996	5.5972
A6/119	3	2013	1	1	light yellow	22.0591	2.57102	0.404705	0.794852	17.2545	26.9781	11.0582	5.33842
A6/119	1	2014	1	1	light yellow	15.5709	2.55047	0.255957	0.94345	29.8122	20.3589	9.39199	7.90905
A6/119	2	2014	1	1	light yellow	17.787	2.33012	0.233253	0.846988	23.6747	16.5783	9.56627	6.59036
A6/119	3	2014	1	1	light yellow	15.6247	2.59018	0.250267	0.988819	27.03	22.056	10.265	8.556
A6/119	1	2013	2	1	light yellow	23.493	3.16229	0.25966	0.973416	14.1216	39.3766	7.31582	4.63679
A6/119	2	2013	2	1	light yellow	27.392	2.79781	0.204719	0.96771	16.0606	31.7586	6.06061	4.86836
A6/119	3	2013	2	1	light yellow	32.8551	2.69839	0.269302	1.03724	18.448	45.1928	8.3226	4.80869
A6/119	1	2014	2	1	light yellow	10.183	2.61464	0.196898	0.848555	42.1002	31.8882	7.03276	7.03276
A6/119	2	2014	2	1	light yellow	12.0611	2.82249	0.256312	0.92071	49.1124	33.2347	7.10059	7.00197
A6/119	3	2014	2	1	light yellow	15.4785	3.02587	0.23488	1.00831	44.27	35.25	8.21	7.2547
A6/119	1	2013	3	1	light yellow	20.455	3.07715	0.305274	1.52637	21.303	22.1303	5.72285	7.65253
A6/119	2	2013	3	1	light yellow	21.0945	3.30945	0.3401	1.65572	22.8856	26.5672	6.56716	7.9602
A6/119	3	2013	3	1	light yellow	17.2973	2.72039	0.344275	1.4285	20.1474	16.9042	7.86241	6.28993
A6/119	1	2014	3	1	light yellow	18.7816	3.43635	0.440911	1.18474	40.0198	42.6944	7.92472	6.53789
A6/119	2	2014	3	1	light yellow	18.9219	3.46785	0.500465	1.19288	46.8843	33.4322	9.19881	6.92384
A6/119	3	2014	3	1	light yellow	19.7042	3.57824	0.435019	1.18034	42.9389	32.0611	9.44656	6.96565
A8/11	1	2013	1	1	light yellow	25.797	3.29011	0.391594	0.931266	11.9938	36.4941	6.2532	5.94567
A8/11	2	2013	1	1	light yellow	21.2933	3.12831	0.371894	0.802953	18.2281	29.5316	6.92464	4.68432
A8/11	3	2013	1	1	light yellow	19.722	3.47363	0.391083	0.780249	17.2579	31.3519	7.95781	6.42378
A8/11	1	2014	1	1	light yellow	11.1937	3.04126	0.25785	0.954631	21.2977	16.0475	8.9153	7.92472
A8/11	2	2014	1	1	light yellow	13.0413	2.7874	0.299213	1.05492	20.6457	12.8543	9.77165	5.72441
A8/11	3	2014	1	1	light yellow	12.0841	2.99374	0.290705	1.21135	25.832	13.894	10.937	6.568
A8/11	1	2013	2	1	light yellow	42.8941	4.24075	0.230309	1.17957	19.6655	12.9752	10.878	7.50127
A8/11	2	2013	2	1	light yellow	42.4358	4.22849	0.338903	1.30146	20.5335	23.4474	9.75038	6.94514
A8/11	3	2013	2	1	light yellow	38.746	4.42518	0.28736	1.24736	18.74	18.57	8.25	7.58
A8/11	1	2014	2	1	light yellow	12.2609	3.04561	0.395194	1.34772	34.4286	23.4429	10.2011	9.61256
A8/11	2	2014	2	1	light yellow	16.0194	3.79952	0.405521	1.26029	42.615	25.4722	9.20097	8.81356
A8/11	3	2014	2	1	light yellow	12.6504	3.51865	0.434262	1.40726	37.2949	29.7812	8.26554	7.45898
A8/11	1	2013	3	1	light yellow	26.7888	2.86009	0.300878	1.12235	18.983	24.3237	7.54311	5.26588
A8/11	2	2013	3	1	light yellow	21.6162	2.92222	0.316061	1.17071	17.9798	22.2626	8.48485	5.85859
A8/11	3	2013	3	1	light yellow	27.2691	3.29056	0.35307	1.31857	18.2726	19.8702	9.18622	6.58862
A8/11	1	2014	3	1	light yellow	18.2186	3.70149	0.371497	1.56283	33.6062	37.7468	7.51083	6.35532
A8/11	2	2014	3	1	light yellow	18.1818	3.89582	0.390172	1.61278	31.941	45.7985	7.86241	6.68305
A8/11	3	2014	3	1	light yellow	17.5758	3.86587	0.420765	1.62643	35.9662	33.8847	7.84898	6.45802
T9/11	1	2013	1	1	light yellow	25.2729	3.67651	0.300951	1.18378	13.1197	29.0586	6.91037	7.51127
T9/11	2	2013	1	1	light yellow	22.3908	3.04369	0.289198	0.985118	17.9549	23.8118	7.20115	7.39318
T9/11	3	2013	1	1	light yellow	22.2088	3.51707	0.293273	0.901908	13.5542	22.1888	7.22892	6.82329
T9/11	1	2014	1	1	light yellow	12.5448	3.30102	0.182453	1.00533	5.91372	12.5206	3.7809	7.5618
T9/11	2	2014	1	1	light yellow	16.0614	2.88174	0.196932	0.915487	8.70856	10.7917	5.58337	7.52103
T9/11	3	2014	1	1	light yellow	18.7523	3.02587	0.20366	1.14732	12.47	12.54	4.25	7.02
T9/11	1	2013	2	1	light yellow	32.8975	3.87279	0.391519	1.10348	12.3221	26.8652	6.76426	6.6633
T9/11	2	2013	2	1	light yellow	37.2671	3.78595	0.415671	1.2451	17.5824	28.1558	6.21118	6.30674
T9/11	3	2013	2	1	light yellow	35.2776	3.4047	0.376788	1.06653	11.6058	33.7169	6.30315	6.4032
T9/11	1	2014	2	1	light yellow	11.5677	3.06816	0.365044	1.00876	47.0302	26.1928	7.98442	6.32911
T9/11	2	2014	2	1	light yellow	13.999	3.24867	0.385797	1.2128	45.6617	24.0427	7.94959	7.94959
T9/11	3	2014	2	1	light yellow	13.5193	2.9349	0.410671	1.1072	44.8899	30.1023	8.90847	5.77582
T9/11	1	2013	3	1	light yellow	18.6853	2.99172	0.395445	1.39545	8.79917	25.3623	4.65839	7.24638
T9/11	2	2013	3	1	light yellow	20.0199	3.3072	0.463821	1.54342	11.9107	25.2109	5.55831	8.83375
T9/11	3	2013	3	1	light yellow	20.2282	3.01687	0.509841	1.47976	8.37302	22.996	7.53968	7.7381
T9/11	1	2014	3	1	light yellow	15.2299	2.41571	0.382854	1.04234	43.7739	37.3563	8.48276	6.56705
T9/11	2	2014	3	1	light yellow	12.1505	1.94917	0.376735	0.908016	36.5591	30.8817	6.69208	5.18084
T9/11	3	2014	3	1	light yellow	13.1111	2.18164	0.343768	0.944251	41.5459	27.4396	5.12077	5.12077
A12/5	1	2013	1	1	light yellow	16.5743	2.23224	0.302166	0.873854	15.3149	16.927	6.44836	5.64232
A12/5	2	2013	1	1	light yellow	17.2607	2.34512	0.33677	0.905547	16.6912	21.7968	6.67649	5.49828
A12/5	3	2013	1	1	light yellow	21.8645	2.05802	0.397759	0.779114	20.1732	28.8334	6.41875	4.78859
A12/5	1	2014	1	1	light yellow	14.7244	3.47539	0.38376	1.26476	37.9921	29.1339	10.6299	8.36614
A12/5	2	2014	1	1	light yellow	13.075	2.98382	0.283129	0.861795	38.8279	21.177	9.84453	7.29671
A12/5	3	2014	1	1	light yellow	14.5799	3.20909	0.313971	1.05437	31.1005	25.68	10.9091	6.547
A12/5	1	2013	2	1	light yellow	28.161	2.64513	0.297416	1.0507	21.8688	35.1889	7.15706	4.47316
A12/5	2	2013	2	1	light yellow	30.1479	1.98266	0.34768	0.987251	19.4799	27.1566	6.01734	5.30342
A12/5	3	2013	2	1	light yellow	36.5872	2.25827	0.31569	1.12585	23.14	32.65	8.36	5.27
A12/5	1	2014	2	1	light yellow	13.9373	2.57641	0.327327	1.07317	39.4674	21.6028	5.77402	6.66999
A12/5	2	2014	2	1	light yellow	15.1701	3.22089	0.439291	1.11548	40.6325	22.4245	7.37901	6.4207
A12/5	3	2014	2	1	light yellow	18.8752	2.85724	0.38522	1.02575	36.58	26.35	6.58	6.24
A12/5	1	2013	3	1	light yellow	37.7441	3.3765	0.235196	1.18538	13.8903	25.0392	5.84856	6.28198
A12/5	2	2013	3	1	light yellow	32.0512	2.83887	0.236113	1.17545	11.4578	23.2225	7.20716	7.87724
A12/5	3	2013	3	1	light yellow	39.1098	3.01682	0.215826	1.21355	16.4194	23.8378	4.9456	5.63798
A12/5	1	2014	3	1	light yellow	25.687	2.98524	0.30925	1.02532	22.33	28.22	6.74	6.55
A12/5	2	2014	3	1	light yellow	28.746	3.21427	0.36836	0.99934	24.8	25.69	7.24	7.02
A12/5	3	2014	3	1	light yellow	26.5892	3.02541	0.37811	1.14587	20.01	31.25	8.64	7.64
AGATA	1	2013	1	1	light yellow	26.223	1.4225	0.340984	1.10723	23.3049	46.007	6.32848	6.22803
AGATA	2	2013	1	1	light yellow	28.3392	1.83735	0.336699	1.29833	18.7496	44.9268	7.57193	6.6633
AGATA	3	2013	1	1	light yellow	20.2627	1.71098	0.347241	1.25591	15.6595	42.3857	8.09249	5.25486
AGATA	1	2014	1	1	light yellow	10.8957	3.23898	0.433661	1.52854	28.3465	16.3386	9.35039	7.28346
AGATA	2	2014	1	1	light yellow	11.4437	3.06352	0.487007	1.47353	24.7353	13.7632	8.90857	7.79596
AGATA	3	2014	1	1	light yellow	15.1573	3.4019	0.438592	1.52072	31.353	21.468	9.885	8.286
AGATA	1	2013	2	1	light yellow	31.531	3.00164	0.264926	1.19611	11.2647	24.4086	6.21659	7.06605
AGATA	2	2013	2	1	light yellow	32.7435	3.32604	0.318191	1.35487	13.2604	22.7058	4.77137	6.56064
AGATA	3	2013	2	1	light yellow	26.0915	2.81102	0.34262	1.24449	12.7859	25.104	5.40541	6.44491
AGATA	1	2014	2	1	light yellow	14.5455	3.82443	0.360269	1.54882	30.6878	20.683	7.69601	7.50361
AGATA	2	2014	2	1	light yellow	16.7485	3.06582	0.446071	1.43222	31.1002	28.8802	8.15324	7.85855
AGATA	3	2014	2	1	light yellow	16.673	3.4522	0.403537	1.59273	38.1453	26.4818	9.80306	7.64818
AGATA	1	2013	3	1	light yellow	22.7891	3.5196	0.352754	1.49355	28.5856	28.6476	5.45906	7.54342
AGATA	2	2013	3	1	light yellow	28.2021	3.95044	0.274733	1.55977	23.6152	21.2828	7.77454	7.87172
AGATA	3	2013	3	1	light yellow	23.1131	3.28128	0.249249	1.39139	23.7237	20.02	6.50651	6.30631
AGATA	1	2014	3	1	light yellow	16.3224	3.44788	0.31805	1.38996	48.0695	32.7529	8.49421	7.72201
AGATA	2	2014	3	1	light yellow	24.6207	3.7526	0.331532	1.29995	40.4859	35.5974	9.60982	7.23847
AGATA	3	2014	3	1	light yellow	17.0974	3.68688	0.407157	1.1501	46.4215	28.33	8.74751	6.66004
HERMES	1	2013	1	1	light yellow	17.0252	3.03654	0.256716	0.782913	19.9691	45.2187	8.07308	7.91148
HERMES	2	2013	1	1	light yellow	17.0872	3.14359	0.251385	0.925026	24.1026	40.3077	9.12821	6.35897
HERMES	3	2013	1	1	light yellow	15.869	3.79665	0.318218	1.14919	24.126	42.836	9.45347	8.27179
HERMES	1	2014	1	1	light yellow	8.69432	1.95161	0.235259	0.777975	33.284	14.025	7.012	6.617
HERMES	2	2014	1	1	light yellow	7.9923	2.74868	0.280164	0.621955	26.851	10.881	8.37	7.622
HERMES	3	2014	1	1	light yellow	13.4544	2.20306	0.256856	0.87506	25.8	19.971	10.702	8.218
HERMES	1	2013	2	1	light yellow	32.1284	3.55981	0.381926	0.979234	19.4718	17.9182	6.90005	7.35008
HERMES	2	2013	2	1	light yellow	35.5415	3.18213	0.379602	1.02312	18.3584	22.0544	8.06217	7.47936
HERMES	3	2013	2	1	light yellow	38.5937	3.87338	0.412403	1.21017	23.041	19.5122	7.36897	7.26518
HERMES	1	2014	2	1	light yellow	8.14218	2.63073	0.362214	1.14218	29.1031	30.6298	5.05725	6.10687
HERMES	2	2014	2	1	light yellow	10.7617	3.31892	0.332875	1.50663	39.2138	29.7789	4.914	7.56757
HERMES	3	2014	2	1	light yellow	12.5873	3.05814	0.35821	1.34728	34.37	28.59	6.21	6.57
HERMES	1	2013	3	1	light yellow	21.0664	3.33903	0.221529	1.30483	19.0141	20.6237	5.14889	8.2495
HERMES	2	2013	3	1	light yellow	17.1892	3.02182	0.303805	1.47945	16.1339	25.3841	4.9721	6.29122
HERMES	3	2013	3	1	light yellow	16.5134	2.65805	0.270019	1.22222	11.6858	21.4559	3.35249	6.22605
HERMES	1	2014	3	1	light yellow	11.6453	2.76749	0.194089	1.11626	24.1379	20	6.40394	5.3202
HERMES	2	2014	3	1	light yellow	13.7476	3.03661	0.350482	1.19268	28.3237	22.158	6.1657	5.97303
HERMES	3	2014	3	1	light yellow	15.8173	3.15824	0.28524	1.02582	20.85	25.36	6.54757	6.063
LADY CLAIRE	1	2013	1	1	light yellow	20.3828	2.48008	0.382928	0.981066	19.2447	30.1092	5.7941	6.4149
LADY CLAIRE	2	2013	1	1	light yellow	20.1304	2.91374	0.238215	0.848847	18.1545	28.0752	5.31595	6.01805
LADY CLAIRE	3	2013	1	1	light yellow	17.5698	3.33224	0.222244	0.875355	17.1485	25.8697	5.19353	5.80157
LADY CLAIRE	1	2014	1	1	light yellow	12.3317	2.75317	0.262146	1.04293	14.9268	25.2683	7.78049	5.95122
LADY CLAIRE	2	2014	1	1	light yellow	10.4508	2.23461	0.304411	0.885797	17.271	23.6175	7.77557	4.65342
LADY CLAIRE	3	2014	1	1	light yellow	14.3613	2.5659	0.350941	0.919389	14.198	20.356	7.837	6.753
LADY CLAIRE	1	2013	2	1	light yellow	35.1828	3.51728	0.227441	1.26189	7.41112	19.329	5.20781	6.71007
LADY CLAIRE	2	2013	2	1	light yellow	38.4039	3.5854	0.294501	1.19124	12.944	21.3139	6.81265	6.618
LADY CLAIRE	3	2013	2	1	light yellow	33.6872	3.02587	0.37869	1.02595	9.24	23.68	7.2147	7.286
LADY CLAIRE	1	2014	2	1	light yellow	10.5963	2.50929	0.3	1.10655	29.0323	24.0469	9.45161	7.13587
LADY CLAIRE	2	2014	2	1	light yellow	14.4256	3.68589	0.290645	1.26568	21.1052	26.1755	10.0824	8.56714
LADY CLAIRE	3	2014	2	1	light yellow	16.5872	3.02547	0.35732	1.38527	25.87	28.98	8.24	8.05974
LADY CLAIRE	1	2013	3	1	light yellow	17.7431	2.98338	0.26529	1.39446	14.8111	29.7229	5.33249	6.34761
LADY CLAIRE	2	2013	3	1	light yellow	19.4177	3.01313	0.255465	1.2348	15.179	25.3699	7.7327	5.6778
LADY CLAIRE	3	2013	3	1	light yellow	20.3065	3.30165	0.297381	1.55868	20.1649	28.225	6.78952	7.46848
LADY CLAIRE	1	2014	3	1	light yellow	15.031	3.66619	0.267	1.36576	37.4964	40.7248	8.68193	8.20219
LADY CLAIRE	2	2014	3	1	light yellow	14.6379	3.56739	0.276355	1.32374	30.7914	42.3022	7.09832	7.86571
LADY CLAIRE	3	2014	3	1	light yellow	14.6064	3.4898	0.265306	1.28183	38.8921	48.2148	7.58017	7.48299
MARABEL	1	2013	1	1	light yellow	19.893	1.2455	0.467963	1.20856	16.3345	30.0438	5.25036	5.25036
MARABEL	2	2013	1	1	light yellow	21.7641	1.18998	0.395094	1.27349	23.5908	36.2923	7.20251	6.41127
MARABEL	3	2013	1	1	light yellow	18.6687	1.11011	0.365966	1.22002	20.9129	28.9289	5.10511	4.4044
MARABEL	1	2014	1	1	light yellow	11.5754	3.02036	0.323316	1.23025	25.594	25.47	9.373	8.337
MARABEL	2	2014	1	1	light yellow	14.227	3.24462	0.402838	1.15264	19.2759	28.5225	6.16438	7.33855
MARABEL	3	2014	1	1	light yellow	16.8268	3.46046	0.355361	1.49151	21.3392	31.344	8.53954	7.27802
MARABEL	1	2013	2	1	light yellow	24.4144	2.45445	0.352252	1.24625	18.3083	18.7287	10.1041	5.7047
MARABEL	2	2013	2	1	light yellow	20.1476	3.13878	0.261417	1.17815	18.2677	13.189	9.84252	6.98819
MARABEL	3	2013	2	1	light yellow	26.8622	2.86695	0.436249	1.32216	11.4196	16.3436	8.36249	6.17182
MARABEL	1	2014	2	1	light yellow	14.7028	2.93378	0.471629	1.77864	38.666	22.233	11.2765	8.60319
MARABEL	2	2014	2	1	light yellow	17.2991	3.38441	0.403872	1.606	37.6263	20.8132	9.19652	7.45402
MARABEL	3	2014	2	1	light yellow	12.2222	3.0355	0.405998	1.5705	36.1849	21.5339	10.0964	6.21141
MARABEL	1	2013	3	1	light yellow	26.3929	3.11123	0.289189	1.16944	17.6715	22.6611	11.4345	7.38046
MARABEL	2	2013	3	1	light yellow	24.5833	3.85625	0.31225	1.25487	20.84	25.36	9.695	7.25
MARABEL	3	2013	3	1	light yellow	28.7452	3.58727	0.38522	1.35609	23.64	21.58	10.255	6.55
MARABEL	1	2014	3	1	light yellow	19.8743	3.25836	0.38722	1.45831	31.64	23.65	10.25	6.95
MARABEL	2	2014	3	1	light yellow	20.5472	3.02478	0.31422	1.32598	25.31	20.89	9.21	7.2541
MARABEL	3	2014	3	1	light yellow	18.574	3.58927	0.28728	1.25341	29.99	22.22	9.96	7.02
MARFONA	1	2013	1	1	light yellow	29.6319	2.54294	0.356442	1.03476	20.4499	39.8773	7.97546	7.15746
MARFONA	2	2013	1	1	light yellow	24.9722	2.49924	0.350935	1.11875	20.5154	34.3608	9.70187	7.17534
MARFONA	3	2013	1	1	light yellow	25.3388	2.60316	0.360418	1.28477	21.4977	40.5502	8.69791	7.51299
MARFONA	1	2014	1	1	light yellow	9.6236	3.65773	0.310093	1.26865	23.9196	20.6728	5.46075	7.02097
MARFONA	2	2014	1	1	light yellow	15.2023	3.72736	0.303854	1.41811	27.168	19.653	7.597	8.478
MARFONA	3	2014	1	1	light yellow	13.574	3.56821	0.28725	1.32507	21.25	21.87	6.54	7.654
MARFONA	1	2013	2	1	light yellow	23.8905	3.71343	0.351741	1.14428	14.5771	12.7363	6.16915	7.56219
MARFONA	2	2013	2	1	light yellow	24.2141	3.63258	0.217441	1.44543	14.7258	17.4621	8.56397	8.14621
MARFONA	3	2013	2	1	light yellow	25.8744	3.45832	0.27561	1.32841	16.25	21.58	7.124	7.68
MARFONA	1	2014	2	1	light yellow	16.3125	3.30238	0.253954	1.36342	33.4789	21.5429	9.02475	9.21883
MARFONA	2	2014	2	1	light yellow	18.0517	3.52107	0.313221	1.29523	31.8091	22.4652	10.338	8.84692
MARFONA	3	2014	2	1	light yellow	11.7286	3.19366	0.257949	1.22932	34.7796	25.2932	8.93413	7.52848
MARFONA	1	2013	3	1	light yellow	15.4784	3.25625	0.27522	1.10241	28.58	24.58	9.25	5.68
MARFONA	2	2013	3	1	light yellow	16.5741	3.02588	0.35211	1.08025	30.55	28.36	8.69	6.88
MARFONA	3	2013	3	1	light yellow	18.7452	2.96387	0.38422	0.98925	31.37	30.22	7.912	6.25
MARFONA	1	2014	3	1	light yellow	16.9783	3.4498	0.388386	1.38484	34.4291	31.4961	11.5157	7.77559
MARFONA	2	2014	3	1	light yellow	17.2723	3.58843	0.37253	1.39759	38.0723	31.8072	12.0482	7.90361
MARFONA	3	2014	3	1	light yellow	16.0636	3.65606	0.369185	1.40954	33.499	31.3121	11.7296	8.15109
A1/58	1	2013	1	4	white	43.6999	2.93083	0.384584	1.12847	21.2025	41.4183	7.91367	7.09147
A1/58	2	2013	1	4	white	47.6205	2.88052	0.378414	1.18775	20.8675	46.0241	8.73494	7.02811
A1/58	3	2013	1	4	white	44.5072	2.66119	0.323614	1.3768	24.846	44.1889	9.03491	7.70021
A1/58	1	2014	1	4	white	13.3011	3.20426	0.39516	0.940561	21.849	17.812	9.293	7.228
A1/58	2	2014	1	4	white	12.838	2.77266	0.29054	0.819812	18.425	18.816	8.637	6.835
A1/58	3	2014	1	4	white	13.84	3.02633	0.352807	0.812221	22.255	14.009	7.054	5.564
A1/58	1	2013	2	4	white	43.5518	2.88744	0.349275	1.69585	27.6138	24.4072	6.003	7.30365
A1/58	2	2013	2	4	white	50.8051	3.14532	0.38962	1.49873	24.0759	18.5316	7.49367	6.48101
A1/58	3	2013	2	4	white	33.4819	3.36166	0.492746	1.79275	21.8653	22.9534	7.67358	7.9171
A1/58	1	2014	2	4	white	20.1773	5.03781	0.325751	1.69178	41.3589	25.2093	10.7031	10.2787
A1/58	2	2014	2	4	white	20.7484	4.85583	0.44195	1.8582	40.9207	29.8917	9.7031	12.2787
A1/58	3	2014	2	4	white	13.6201	4.70759	0.393523	1.46738	39.7293	22.6728	8.60319	11.2131
A1/58	1	2013	3	4	white	22.3892	4.05299	0.261464	1.79672	23.025	37.0906	7.32177	10.1156
A1/58	2	2013	3	4	white	24.6571	4.45036	0.397646	2.19857	25.6909	36.0287	8.62129	10.5343
A1/58	3	2013	3	4	white	23.3417	4.95018	0.38928	1.50478	28.8223	39.4263	7.24711	9.74383
A1/58	1	2014	3	4	white	23.1836	4.90727	0.62218	1.85564	43.021	37.0937	12.6195	12.2371
A1/58	2	2014	3	4	white	24.8569	5.12438	0.641658	1.95558	41.1649	39.9803	12.8332	12.9319
A1/58	3	2014	3	4	white	24.6377	5.05894	0.66029	1.96329	43.7681	39.3237	12.4638	13.0435
A5/6	1	2013	1	4	white	21.8116	1.66238	0.442306	0.971076	16.0576	25.9393	9.62	7.20535
A5/6	2	2013	1	4	white	29.55	1.603	0.3238	1.175	17.7	28.4	10.1	8.5
A5/6	3	2013	1	4	white	25.7172	1.50775	0.312215	1.08667	15.8135	24.6325	8.21085	7.87937
A5/6	1	2014	1	4	white	13.8056	2.42891	0.316324	0.741886	10.7228	11.5318	3.39	7.45716
A5/6	2	2014	1	4	white	13.0743	2.60418	0.282467	0.873142	9.61632	11.1656	4.75959	6.50801
A5/6	3	2014	1	4	white	14.0637	2.73359	0.319305	0.95695	13.328	14.189	5.52	8.977
A5/6	1	2013	2	4	white	33.9249	3.18824	0.305984	1.37566	27.8661	14.7059	6.49087	8.41785
A5/6	2	2013	2	4	white	31.832	3.63057	0.29504	1.28036	32.7935	17.251	8.15	9.0081
A5/6	3	2013	2	4	white	32.8128	3.37938	0.284985	1.14414	25.7217	22.4224	7.40741	8.00601
A5/6	1	2014	2	4	white	14.0788	3.17931	0.415764	1.2069	45.8128	29.2611	8.51	8.64039
A5/6	2	2014	2	4	white	12.1823	2.86644	0.387876	1.24927	47.2357	24.064	6.01358	9.31135
A5/6	3	2014	2	4	white	14.2843	2.91828	0.385503	1.17583	44.5716	21.2977	7.62754	7.92472
A5/6	1	2013	3	4	white	19.6445	3.35912	0.326503	1.43335	15.6822	29.2734	4.91375	5.43649
A5/6	2	2013	3	4	white	17.9716	3.15801	0.476166	1.54868	11.4402	25.9635	5.98377	7.50507
A5/6	3	2013	3	4	white	19.021	3.07233	0.339461	1.56743	10.5894	23.7762	6.29371	6.89311
A5/6	1	2014	3	4	white	17.9244	3.22047	0.35385	1.43568	30.3109	38.5462	8.51267	7.55619
A5/6	2	2014	3	4	white	18.2114	3.32281	0.315112	1.42611	36.7288	37.494	8.22573	7.65184
A5/6	3	2014	3	4	white	17.5012	3.41792	0.413317	1.39855	32.8329	35.8354	9.63	8.49153
T5/4	1	2013	1	4	white	39.183	3.13133	0.237022	1.13299	12.9266	22.4405	6.92865	5.96381
T5/4	2	2013	1	4	white	39.667	3.85873	0.280827	1.25126	15.2371	24.9041	5.04541	6.1554
T5/4	3	2013	1	4	white	44.4252	3.08647	0.228789	1.25229	14.1506	25.412	7.8	7.13835
T5/4	1	2014	1	4	white	16.5839	3.07932	0.408467	1.47445	21.2165	24.3796	6.68	5.36983
T5/4	2	2014	1	4	white	19.3382	2.58818	0.357074	0.844283	21.124	29.6899	7.39	4.16667
T5/4	3	2014	1	4	white	12.5266	2.84608	0.337173	1.05034	21.3069	32.5073	8.73	5.4211
T5/4	1	2013	2	4	white	33.2534	3.07049	0.203128	0.961627	25.2346	21.4567	7.19499	4.58811
T5/4	2	2013	2	4	white	35.7728	2.82078	0.196827	1.06643	22.0461	28.9969	6.96008	4.80246
T5/4	3	2013	2	4	white	30.8937	2.63903	0.173909	0.880534	20.8885	28.115	6.06061	4.93066
T5/4	1	2014	2	4	white	12.8352	3.35161	0.384661	1.22118	37.2984	30.0841	8.01583	6.13558
T5/4	2	2014	2	4	white	13.5544	2.8864	0.32979	1.34373	35.9824	21.648	10.6	6.82594
T5/4	3	2014	2	4	white	15.8743	3.14722	0.35824	1.19954	33.12	25.87	9.65	6.08
T5/4	1	2013	3	4	white	20.1615	3.70333	0.341473	1.28254	16.7508	22.9062	8.98083	7.76993
T5/4	2	2013	3	4	white	20.6283	3.42774	0.21972	1.23731	21.073	15.8531	7.38	7.63654
T5/4	3	2013	3	4	white	26.8413	3.86196	0.298539	1.33703	23.9547	18.6398	9.06801	7.37783
T5/4	1	2014	3	4	white	17.3858	3.05005	0.420117	1.03887	28.6686	24.8785	8.06608	6.60836
T5/4	2	2014	3	4	white	15.1359	2.75441	0.409442	1.25513	25.0777	30.4244	6.29471	8.01144
T5/4	3	2014	3	4	white	15.1416	2.7531	0.457427	1.30253	30.6011	29.6076	6.45802	7.65027
T5/32	1	2013	1	4	white	34.4923	4.42667	0.443179	1.49221	20.3077	37.9487	10.359	6.66667
T5/32	2	2013	1	4	white	42.0171	4.66483	0.401054	1.50728	24.2198	40.9589	9.73407	6.82388
T5/32	3	2013	1	4	white	36.5827	4.85333	0.327605	1.38074	23.5062	43.2593	9.4	7.7037
T5/32	1	2014	1	4	white	13.5865	3.075	0.440962	1.17596	20.8654	14.1346	5.09615	6.34615
T5/32	2	2014	1	4	white	11.8034	3.55774	0.353612	1.13612	15.4791	11.9902	5.11057	6.28993
T5/32	3	2014	1	4	white	9.31787	3.35933	0.361106	1.17966	21.0267	20.9279	4.95	7.60118
T5/32	1	2013	2	4	white	29.3812	2.66168	0.21517	1.37046	16.0679	26.8463	8.28343	6.68663
T5/32	2	2013	2	4	white	29.7602	2.91345	0.23879	1.40459	14.9114	31.2826	7.09072	6.67362
T5/32	3	2013	2	4	white	33.0501	2.77491	0.286899	1.2261	12.3419	28.6292	5.56399	7.1826
T5/32	1	2014	2	4	white	16.3025	2.50025	0.359466	1.28127	40.393	26.3124	12.15	8.20564
T5/32	2	2014	2	4	white	14.5472	2.87326	0.438524	1.43172	46.7657	29.9952	10.5414	9.7748
T5/32	3	2014	2	4	white	18.8902	2.34736	0.322206	1.39884	42.1867	22.7383	11.87	7.48283
T5/32	1	2013	3	4	white	30.5662	3.52779	0.332675	1.68182	22.4416	24.4156	9.55844	7.79221
T5/32	2	2013	3	4	white	34.1024	3.31454	0.343973	1.84997	27.6255	18.5235	10.3466	7.13916
T5/32	3	2013	3	4	white	30.6279	3.40241	0.359184	1.70277	31.8158	25.7588	10.01	7.95395
T5/32	1	2014	3	4	white	10.5579	2.29018	0.286505	0.929804	30.9013	21.9361	4.1011	5.05484
T5/32	2	2014	3	4	white	11.5569	2.77843	0.2694	0.887653	31.8643	18.6432	4.00195	4.97804
T5/32	3	2014	3	4	white	14.4743	2.62738	0.349731	1.09829	32.8606	22.4694	4.8	5.50856
A5/70	1	2013	1	4	white	20.4006	2.47345	0.257627	1.01079	13.2722	29.7078	7.70416	5.95788
A5/70	2	2013	1	4	white	22.5758	2.60517	0.28553	0.915067	17.5037	33.4162	8.05569	5.86773
A5/70	3	2013	1	4	white	16.6376	3.01076	0.304577	0.968529	16.7094	26.448	7.38083	5.40595
A5/70	1	2014	1	4	white	11.9695	2.3319	0.392275	0.889461	24.13	19.552	8.011	7.63
A5/70	2	2014	1	4	white	14.6432	2.57425	0.367742	1.07331	27.761	26.911	10.459	8.557
A5/70	3	2014	1	4	white	13.6359	2.70181	0.414641	0.921327	30.1947	23.4797	9.93	6.8326
A5/70	1	2013	2	4	white	33.9802	2.12346	0.397827	1.13975	18.9877	22.2469	8	5.62963
A5/70	2	2013	2	4	white	34.4766	2.58026	0.423131	1.15852	17.9163	26.7139	7.37787	5.48355
A5/70	3	2013	2	4	white	36.2221	2.44373	0.340506	1.28508	14.9727	30.1438	7.53594	6.44522
A5/70	1	2014	2	4	white	10.4942	2.70407	0.235271	1.02713	40.8915	28.1977	8.81783	8.04264
A5/70	2	2014	2	4	white	10.8984	2.53242	0.288574	1.12305	40.4297	17.9688	7.73	8.59375
A5/70	3	2014	2	4	white	11.7509	2.95439	0.277783	1.1025	35.0172	23.1486	9.41638	9.22021
A5/70	1	2013	3	4	white	28.4398	3.90906	0.356711	1.08965	22.4864	28.524	7.03318	5.34918
A5/70	2	2013	3	4	white	28.1226	3.66634	0.385117	1.38035	20.8132	29.1829	5.7393	6.71206
A5/70	3	2013	3	4	white	21.5891	3.39786	0.317669	1.17381	22.3732	32.4098	6.06377	5.51385
A5/70	1	2014	3	4	white	20.3432	3.95424	0.432412	1.29647	41.001	38.5129	11.6301	8.00763
A5/70	2	2014	3	4	white	19.9317	3.92293	0.586439	1.34927	35.6098	36.3902	12.6829	7.80488
A5/70	3	2014	3	4	white	20.0493	4.03056	0.567127	1.14587	39.6254	40.6668	13.6028	8.37851
A8/34	1	2013	1	4	white	21.8731	2.89098	0.305352	1.11397	13.1913	28.8404	9.21705	6.04559
A8/34	2	2013	1	4	white	21.1667	2.31891	0.247059	1.07715	13.5148	31.8765	8.19494	6.31988
A8/34	3	2013	1	4	white	20.0103	2.01132	0.251004	1.23932	14.4107	36.5414	10.3963	6.89655
A8/34	1	2014	1	4	white	15.6838	3.5063	0.321009	1.17847	29.583	18.914	12.803	6.378
A8/34	2	2014	1	4	white	11.6526	3.32208	0.294342	0.907097	26.3524	26.2978	10.98	4.56576
A8/34	3	2014	1	4	white	18.7453	3.02587	0.28536	1.08732	21.85	22.54	11.25	5.87
A8/34	1	2013	2	4	white	21.5128	3.35855	0.45943	1.48861	8.54617	19.1552	7.36739	5.00982
A8/34	2	2013	2	4	white	25.5094	3.9545	0.477844	1.31949	7.22057	15.1335	8.50643	6.13254
A8/34	3	2013	2	4	white	20.1538	3.82214	0.433573	1.54792	9.06715	19.7847	6.35572	7.38083
A8/34	1	2014	2	4	white	10.7242	3.29017	0.258034	1.07626	32.9017	30.2158	6.42686	6.90647
A8/34	2	2014	2	4	white	8.36829	3.53649	0.20667	1.19091	31.8995	22.4263	7.82987	6.76655
A8/34	3	2014	2	4	white	10.7242	3.29017	0.258034	1.07626	32.9017	30.2158	6.42686	6.90647
A8/34	1	2013	3	4	white	19.8325	3.21466	0.289424	1.30785	14.0314	17.6963	5.65445	6.70157
A8/34	2	2013	3	4	white	19.95	2.94547	0.297849	1.26063	16.3082	20.1101	4.6023	4.70235
A8/34	3	2013	3	4	white	17.6352	2.77645	0.324557	1.16367	12.9248	22.1158	4.97846	5.26568
A8/34	1	2014	3	4	white	22.0578	3.24717	0.29999	1.02532	15.87	25.87	5.87	5.54
A8/34	2	2014	3	4	white	25.8743	3.05819	0.31587	0.98932	18.77	28.37	6.25	6.24
A8/34	3	2014	3	4	white	20.5871	3.39805	0.33054	1.12574	19.65	30.25	6.66	5.08
A13/1	1	2013	1	4	white	26.8037	3.19838	0.27103	0.954287	15.8295	21.8163	6.90005	5.27651
A13/1	2	2013	1	4	white	24.7343	2.80669	0.287697	0.863681	14.5669	22.9331	6.20079	5.90551
A13/1	3	2013	1	4	white	23.9406	2.65609	0.267349	0.859263	17.912	27.9427	6.96008	5.42477
A13/1	1	2014	1	4	white	13.7261	2.13549	0.318115	0.700049	11.2911	13.5346	8.35	4.51645
A13/1	2	2014	1	4	white	15.2804	2.51487	0.318284	0.826329	15.28	12.579	9.459	6.191
A13/1	3	2014	1	4	white	18.5693	2.85724	0.35835	0.92434	18.25	15.25	7.99	5.25
A13/1	1	2013	2	4	white	18.4182	3.42067	0.292188	0.929452	14.5609	23.2945	8.9277	6.30762
A13/1	2	2013	2	4	white	22.9175	2.92857	0.25336	1.25453	17.2032	20.8249	5.33199	6.03622
A13/1	3	2013	2	4	white	25.6034	3.21091	0.270199	1.0766	19.0976	24.9738	7.76495	5.66632
A13/1	1	2014	2	4	white	13.5784	2.46176	0.177647	0.984314	34.902	15.2941	8.62745	6.86275
A13/1	2	2014	2	4	white	12.2767	2.98724	0.169185	0.813935	39.8528	17.0756	5.00491	5.00491
A13/1	3	2014	2	4	white	11.7891	2.63874	0.191917	1.05569	30.4584	20.4584	6.99852	6.30853
A13/1	1	2013	3	4	white	18.4608	2.67549	0.29598	1.36961	12.7451	24.7059	6.62745	6.66667
A13/1	2	2013	3	4	white	23.5225	3.09706	0.160274	1.43738	13.4051	19.3738	7.14286	6.45793
A13/1	3	2013	3	4	white	26.2808	2.50288	0.197276	1.39654	10.791	20.8958	5.76218	7.33368
A13/1	1	2014	3	4	white	17.7026	2.59295	0.267016	1.07054	38.9037	26.7874	6.00763	6.95901
A13/1	2	2014	3	4	white	13.2162	3.06213	0.340898	1.09712	32.1132	25.0854	5.56369	6.34456
A13/1	3	2014	3	4	white	14.2184	2.68865	0.365849	1.12362	39.1486	26.455	5.77201	6.73401
A13/3	1	2013	1	4	white	20.9865	3.48162	0.328046	0.900193	14.5068	21.1799	6.96325	6.28627
A13/3	2	2013	1	4	white	24.6983	3.04313	0.362809	0.814837	20.178	32.7181	7.12166	6.42928
A13/3	3	2013	1	4	white	18.8573	2.85735	0.29822	0.87425	18.02	27.5843	8.25	5.9965
A13/3	1	2014	1	4	white	17.7338	2.83078	0.272093	0.673478	37.006	21.376	5.54	6.438
A13/3	2	2014	1	4	white	14.016	2.9021	0.22967	0.70989	31.169	11.988	4.161	8.292
A13/3	3	2014	1	4	white	17.8872	2.77157	0.250458	0.537928	32.5783	16.7831	3.85542	7.20482
A13/3	1	2013	2	4	white	32.6105	3.34471	0.240596	0.953135	17.6773	13.258	5.13875	6.47482
A13/3	2	2013	2	4	white	31.0766	3.03811	0.275263	1.25588	13.1137	19.4442	7.01052	7.11067
A13/3	3	2013	2	4	white	34.5838	3.57372	0.254564	1.12538	11.7352	11.7352	6.11836	6.72016
A13/3	1	2014	2	4	white	14.2773	1.80664	0.183496	0.943652	37.7344	16.2109	7.91016	4.98047
A13/3	2	2014	2	4	white	16.8307	2.33602	0.236024	1.03012	39.4094	17.4606	6.83071	5.15354
A13/3	3	2014	2	4	white	13.0991	2.18936	0.191898	0.940068	33.5774	13.958	6.14934	5.46608
A13/3	1	2013	3	4	white	25.7098	3.03882	0.361341	1.25228	16.7627	17.3913	7.12415	6.80985
A13/3	2	2013	3	4	white	24.7344	3.27827	0.314308	1.39611	15.4603	22.93	4.31352	7.68017
A13/3	3	2013	3	4	white	27.9503	2.55053	0.337341	1.17255	12.2339	16.2354	5.63825	5.17504
A13/3	1	2014	3	4	white	13.6421	2.51963	0.356681	1.10757	34.0569	31.4182	6.17463	5.56054
A13/3	2	2014	3	4	white	11.096	2.73104	0.343744	1.1193	33.4627	31.5228	6.40155	4.17071
A13/3	3	2014	3	4	white	12.3259	3.16148	0.310914	1.17333	32.9877	31.3086	7.01235	4.54321
BB std	1	2013	1	4	white	20.8722	2.35095	0.377835	0.77568	17.4448	24.2175	6.67009	4.00205
BB std	2	2013	1	4	white	19.6142	2.82703	0.224236	0.524288	15.9109	17.2967	5.17866	4.97152
BB std	3	2013	1	4	white	18.7538	2.58501	0.265552	0.585816	19.8278	20.2634	5.77508	4.35664
BB std	1	2014	1	4	white	10.4958	2.50663	0.253805	0.775258	14.9239	12.273	4.61463	6.08738
BB std	2	2014	1	4	white	13.0799	2.71415	0.276805	0.681136	18.8739	15.8807	6.3359	7.21848
BB std	3	2014	1	4	white	10.4916	2.40573	0.188162	0.835895	15.2506	13.7184	5.10024	5.91885
BB std	1	2013	2	4	white	27.3212	2.40584	0.367472	0.812185	16.3142	10.6747	6.34441	5.74018
BB std	2	2013	2	4	white	35.66	2.563	0.283	1.026	18.61	18.6	5.6	6.2
BB std	3	2013	2	4	white	33.2582	2.85624	0.34577	0.95421	12.25	15.68	7.254	6.87
BB std	1	2014	2	4	white	15.0862	2.79406	0.348467	1.159	30.8429	20.6245	8.14176	7.56705
BB std	2	2014	2	4	white	13.3719	3.07322	0.295183	1.09345	26.4933	21.3738	8.3815	8.09249
BB std	3	2014	2	4	white	9.02933	2.64301	0.262952	0.911144	35.259	17.2043	7.03812	6.96285
BB std	1	2013	3	4	white	25.2297	3.48289	0.310655	1.23265	19.8436	24.783	8.60215	5.96285
BB std	2	2013	3	4	white	21.0494	3.08981	0.366196	1.35015	17.7598	22.9051	6.86176	6.4672
BB std	3	2013	3	4	white	20.1327	2.7218	0.330168	1.08627	18.4788	22.4604	7.96069	5.7172
BB std	1	2014	3	4	white	12.6033	2.62728	0.259078	0.783573	26.3593	18.3477	6.34006	5.18732
BB std	2	2014	3	4	white	15.8743	2.85724	0.35411	0.87421	28.36	20.25	5.84	4.95
BB std	3	2014	3	4	white	17.8454	3.02547	0.38733	0.95231	31.82	21.58	7.25	5.99
T6/28	1	2013	1	1	ligh yellow	39.4295	2.70861	0.293361	0.931846	16.2863	43.5477	6.95021	6.43154
T6/28	2	2013	1	1	ligh yellow	36.1044	2.7743	0.197189	1.06325	19.6787	48.8956	6.92771	6.4257
T6/28	3	2013	1	1	ligh yellow	35.7566	2.45138	0.24961	1.0389	19.4488	44.8258	9.8804	7.3843
T6/28	1	2014	1	1	ligh yellow	12.876	2.06271	0.299853	0.696913	11.171	18.7188	9.58795	6.99755
T6/28	2	2014	1	1	ligh yellow	10.4798	2.52015	0.259981	0.938196	19.77	10.653	8.253	7.965
T6/28	3	2014	1	1	ligh yellow	12.1254	2.15671	0.308619	0.777473	15.749	23.604	7.933	8.619
T6/28	1	2013	2	1	ligh yellow	37.2751	3.05296	0.292134	1.32853	21.1825	32.6735	8.12339	8.32905
T6/28	2	2013	2	1	ligh yellow	31.941	2.7941	0.292678	1.27273	14.8403	27.027	6.58477	9.97789
T6/28	3	2013	2	1	ligh yellow	40.1678	3.46146	0.244573	1.21552	18.956	21.7095	7.27792	10.5926
T6/28	1	2014	2	1	ligh yellow	11.8411	3.1657	0.232558	1.25	24.4186	36.0465	7.65504	8.04264
T6/28	2	2014	2	1	ligh yellow	12.9547	3.06539	0.298043	1.2105	34.5585	23.6754	8.30549	9.26014
T6/28	3	2014	2	1	ligh yellow	15.3652	2.87421	0.24587	1.32521	28.61	29.57	7.621	8.67
T6/28	1	2013	3	1	ligh yellow	21.2541	2.58725	0.25836	1.2542	17.8	24.57	8.55	8.22
T6/28	2	2013	3	1	ligh yellow	23.584	2.78521	0.32514	1.12412	19.33	21.58	9.12	7.21
T6/28	3	2013	3	1	ligh yellow	25.8741	2.98514	0.30865	1.02531	23.21	27.64	10.21	9.54
T6/28	1	2014	3	1	ligh yellow	19.8743	2.53688	0.38725	1.02521	21.08	28.56	7.25	8.22
T6/28	2	2014	3	1	ligh yellow	20.5871	2.85211	0.3571	0.98924	24.55	30.25	8.88	9.24
T6/28	3	2014	3	1	ligh yellow	17.8452	3.02417	0.31407	1.02474	25.33	32.88	9.14	8.99
						26489.3

## Sheet: Mean Values
Clone No	Year	Loc.	Color Code	COLOR	K g/ kg	P g/kg	Ca g/kg	Mg g/kg	Fe mg/kg	Zn mg/kg	Cu mg/kg	Mn mg/kg
A1/9	2013	2	1	light yellow	48.839	4.98743	0.476871	1.19248	17.3577	32.6715	10.4404	6.72986
A2/127	2013	1	1	light yellow	47.4791	2.9765	0.397499	1.20431	19.6701	37.5399	6.77069	5.63985
A10/15	2013	1	3	cream	46.7195	4.51811	0.398668	1.442	15.0704	41.5431	8.08304	5.92945
A3/108	2013	2	2	dark yellow	46.4833	5.13187	0.435765	1.12696	21.2548	33.4576	11.3335	6.40509
A3/26	2013	1	1	light yellow	46.3211	2.07544	0.267894	1.1155	35.5029	45.1541	8.24388	5.29242
A1/58	2013	1	4	white	45.2759	2.82418	0.362204	1.23101	22.3053	43.8771	8.56117	7.27326
A3/351	2013	2	2	dark yellow	44.9814	4.59816	0.217081	1.11552	18.7233	23.3397	10.379	7.51263
T11/10	2013	2	3	cream	44.414	4.64737	0.362136	1.34713	16.8362	20.2675	11.3494	7.78432
A7/12	2013	1	3	cream	44.2437	3.84782	0.128876	0.886984	16.4575	33.1347	6.36961	6.21821
A5/60	2013	2	3	cream	43.7618	4.00194	0.282812	1.28278	24.4516	28.1784	11.3424	6.26052
A2/73	2013	1	2	dark yellow	43.7337	3.64998	0.314896	1.18148	20.8584	31.4175	8.17122	6.68055
A3/177	2013	2	1	light yellow	43.7199	2.67773	0.394717	1.22826	22.4241	15.5636	9.57411	7.42335
A3/346	2013	2	2	dark yellow	43.6405	3.06383	0.247856	1.20161	12.5208	18.8282	7.39439	7.55828
A3/321	2013	2	1	light yellow	43.2802	3.34057	0.337692	1.27726	27.8738	25.383	9.73323	6.79882
A6/76	2013	2	3	cream	42.9298	3.94817	0.232137	1.14877	10.9693	18.9583	8.47612	6.30626
A3/337	2013	2	1	light yellow	42.8457	5.57652	0.57158	1.41176	25.2551	34.194	11.6689	8.57761
A1/58	2013	2	4	white	42.6129	3.13147	0.410547	1.66244	24.5183	21.9641	7.05675	7.23392
A8/11	2013	2	1	light yellow	41.3586	4.29814	0.285524	1.2428	19.6463	18.3309	9.62613	7.34214
T5/4	2013	1	4	white	41.0918	3.35884	0.24888	1.21218	14.1048	24.2522	6.59135	6.41919
A3/275	2013	1	1	light yellow	40.519	3.46302	0.231526	0.9193	20.6874	43.8049	8.88627	5.15776
A5/98	2013	2	3	cream	40.312	3.20149	0.433916	1.18632	14.4587	22.6741	7.44898	6.52661
A5/60	2013	1	3	cream	40.2014	3.29902	0.161065	0.963732	22.2646	46.3337	11.2636	6.47053
A2/99	2013	2	1	light yellow	40.0619	3.71047	0.396209	1.40384	10.8129	33.9117	8.43896	6.79271
A3/164	2013	2	1	light yellow	39.6932	1.241	0.347402	1.15265	18.6514	28.2887	8.00365	7.19689
A3/15	2013	2	2	dark yellow	39.0439	3.16852	0.429548	1.25611	21.7902	26.8061	8.72036	7.15759
A6/76	2013	1	3	cream	38.5511	2.13081	0.271856	0.907912	13.7334	25.7741	6.9721	5.12381
A7/12	2013	2	3	cream	38.4576	3.62505	0.156861	1.18986	15.5234	42.0676	9.34693	7.63704
T5/14	2013	2	3	cream	38.4355	3.33973	0.245801	1.23531	10.2	18.3651	7.00473	7.376
A2/11	2013	2	2	dark yellow	37.7834	3.31883	0.343453	1.27943	13.056	28.4823	6.4085	6.69048
A3/368	2013	2	2	dark yellow	37.7828	3.74263	0.349783	1.26772	30.9893	16.4125	7.97698	6.18649
A3/110	2013	2	2	dark yellow	37.769	2.55331	0.211252	1.35119	10.7254	20.6442	8.52096	8.09732
A3/26	2013	2	1	light yellow	37.751	3.97572	0.232517	1.13239	19.1227	23.8666	8.70797	6.84645
A4/9	2013	1	3	cream	37.7493	1.8534	0.288016	1.11751	16.7304	44.1428	6.17475	6.35935
T5/32	2013	1	4	white	37.6974	4.64828	0.390613	1.46007	22.6779	40.7223	9.83101	7.06475
A10/15	2013	2	3	cream	37.4702	3.56687	0.30729	1.33413	19.7333	23.5985	10.5473	6.34831
T6/28	2013	1	1	ligh yellow	37.0968	2.64476	0.24672	1.01133	18.4713	45.7564	7.91944	6.74718
A3/116	2013	2	3	cream	37.0906	3.46776	0.424278	1.3401	15.4707	22.6678	7.23	6.88347
T1/26	2013	2	1	light yellow	37.0788	2.77042	0.386686	1.02811	15.3171	23.2889	5.71674	4.92933
A6/71	2013	2	1	light yellow	36.8859	2.90946	0.371662	1.30744	10.3374	22.4865	8.27863	5.69326
A5/98	2013	1	3	cream	36.8207	3.00686	0.444592	1.42178	25.8357	33.1322	7.90696	5.90662
T6/28	2013	2	1	ligh yellow	36.4613	3.10284	0.276461	1.27226	18.3263	27.1367	7.32869	9.63316
A12/5	2013	3	1	light yellow	36.3017	3.0774	0.229045	1.19146	13.9225	24.0332	6.00044	6.59907
A9/4	2013	2	2	dark yellow	36.2763	1.90477	0.230552	1.03973	15.2658	25.9588	6.20108	4.80888
A3/167	2013	2	1	light yellow	35.9789	3.22288	0.351206	0.955544	14.4688	16.9802	6.79096	5.81943
A3/206	2013	1	1	dark yellow	35.9236	3.78417	0.258726	0.87461	14.9651	34.9534	7.16654	6.40818
LADY CLAIRE	2013	2	1	light yellow	35.758	3.37618	0.300211	1.15969	9.86505	21.441	6.41172	6.87136
A3/29	2013	2	1	light yellow	35.7185	1.74197	0.344773	1.09962	21.7516	14.5354	4.84621	4.77139
A3/26	2014	1	1	light yellow	35.5842	2.76033	0.36524	1.29348	38.7833	40.56	9.34333	6.34
A3/234	2013	2	1	light yellow	35.5779	3.86356	0.354991	1.05869	12.7124	15.9624	7.91657	5.69799
HERMES	2013	2	1	light yellow	35.4212	3.53844	0.39131	1.07084	20.2904	19.8283	7.44373	7.36487
T6/3	2013	1	1	light yellow	35.3992	3.71511	0.2497	0.880166	20.7565	41.4281	8.84761	6.71768
GRANOLA	2013	2	2	dark yellow	35.2267	4.24581	0.411215	1.64313	23.1196	35.8929	9.17469	4.82899
A3/206	2013	2	2	dark yellow	35.1966	3.24721	0.212088	1.21777	14.979	19.7418	6.31132	7.34254
T9/11	2013	2	1	light yellow	35.1474	3.68782	0.39466	1.13837	13.8368	29.5793	6.4262	6.45775
A5/70	2013	2	4	white	34.893	2.38248	0.387154	1.19445	17.2922	26.3682	7.63794	5.8528
T6/17	2013	1	1	light yellow	34.3778	2.50328	0.231233	1.04839	20.5743	26.4446	7.39866	7.06845
A3/74	2013	2	2	dark yellow	34.2561	1.21132	0.369642	1.07722	11.4328	16.542	5.52104	4.89078
A2/127	2013	2	1	light yellow	34.1166	3.15441	0.469307	1.34142	11.0423	23.4066	6.09361	6.2871
A3/321	2013	1	1	light yellow	34.0994	2.82617	0.287133	1.04888	18.532	23.7105	9.14928	6.3948
T6/17	2013	2	1	light yellow	34.0991	4.5794	0.265702	1.24034	14.601	20.8421	6.53671	7.37428
A3/167	2013	1	1	light yellow	34.0433	2.1792	0.242347	0.855258	27.3662	31.2523	7.6091	4.55183
T5/4	2013	2	4	white	33.3066	2.84343	0.191288	0.96953	22.7231	26.1896	6.73856	4.77374
A5/6	2013	2	4	white	32.8566	3.39939	0.295336	1.26672	28.7938	18.1264	7.34943	8.47732
A13/3	2013	2	4	white	32.7569	3.31885	0.256808	1.11146	14.1754	14.8124	6.08921	6.76855
A2/73	2013	2	2	dark yellow	32.6852	3.56277	0.503477	1.07042	12.3589	23.9259	7.7164	6.86127
T9/13	2013	1	2	dark yellow	32.6365	3.38106	0.245261	1.18577	18.2526	40.3527	8.46378	8.21857
T5/14	2013	1	3	cream	32.5231	2.52843	0.246979	1.11557	16.7634	21.86	8.51333	7.7321
BB std	2013	2	4	white	32.0798	2.60836	0.332081	0.930798	15.7247	14.9849	6.39947	6.27006
T5/32	2013	3	4	white	31.7655	3.41491	0.345277	1.74486	27.2943	22.8993	9.97168	7.62844
A4/9	2013	2	3	cream	31.6485	3.38692	0.262561	1.25128	17.4661	27.511	9.41277	7.82409
A12/5	2013	2	1	light yellow	31.632	2.29535	0.320262	1.0546	21.4962	31.6651	7.17813	5.01553
A3/116	2013	1	3	cream	31.5042	3.04287	0.231776	0.816304	20.7297	28.0594	6.57213	6.93322
A6/71	2013	1	1	light yellow	31.0221	2.65684	0.280264	1.03233	10.8848	26.0143	5.49443	5.16938
A6/103	2013	2	1	light yellow	30.7328	3.10802	0.285036	1.23082	11.8678	15.4635	8.93486	5.78219
T5/32	2013	2	4	white	30.7305	2.78335	0.246953	1.33372	14.4404	28.9194	6.97938	6.84761
A3/189	2013	2	1	light yellow	30.4931	2.76439	0.356185	0.93632	9.63879	25.9001	6.80699	5.68732
AGATA	2013	2	1	light yellow	30.122	3.04623	0.308579	1.26516	12.437	24.0728	5.46446	6.69053
A2/99	2013	1	1	light yellow	29.896	3.54441	0.547596	1.0323	29.3743	38.882	9.82188	5.08589
A9/8	2013	2	2	dark yellow	29.8784	2.58962	0.356481	1.17199	13.4765	25.9934	9.33984	7.15891
A3/189	2013	3	1	light yellow	29.7415	2.91106	0.279603	1.2316	18.8332	17.6079	6.58737	6.06384
A2/11	2014	3	2	dark yellow	29.5532	5.07939	0.519023	2.15288	56.0467	53.9407	7.89	10.455
A3/351	2013	1	2	dark yellow	29.4833	2.92613	0.2974	1.22746	20.9123	36.5544	8.73668	7.89676
A3/37	2013	2	1	light yellow	29.4434	3.59668	0.431686	1.21329	12.0767	28.356	7.57043	6.1495
A9/8	2014	3	2	dark yellow	29.3896	4.54711	0.362151	1.84343	37.4	44.1172	11.3179	10.6569
T6/3	2013	2	1	light yellow	29.1916	2.7737	0.209393	1.06814	23.8628	17.2825	7.72485	6.52992
A6/103	2013	1	1	light yellow	28.9498	3.81248	0.319112	0.910392	17.2163	23.7758	6.171	5.7731
A3/206	2014	3	2	dark yellow	28.4731	2.80071	0.351323	1.18504	18.7133	23.7267	7.81333	6.07
T4/4	2014	1	1	light yellow	28.2779	3.043	0.417731	1.16404	22.2867	28.4533	7.43333	6.39667
SLANEY	2013	3	3	cream	28.2617	2.5395	0.218015	0.669723	15.6734	32.3814	4.77844	4.76053
A3/116	2013	3	3	cream	28.1077	4.05255	0.323899	1.46255	28.2992	18.3489	7.35467	9.08958
A2/11	2013	3	2	dark yellow	28.058	3.58349	0.273581	1.48584	21.6502	25.9529	5.41919	5.97909
A3/164	2013	1	1	light yellow	28.0462	2.07988	0.237694	0.785344	17.4609	27.3643	7.76373	5.53431
A6/119	2013	2	1	light yellow	27.9133	2.88616	0.24456	0.992788	16.2101	38.776	7.23301	4.77128
A3/15	2013	1	2	dark yellow	27.8711	3.67264	0.747673	1.00875	20.8564	27.8287	11.4682	5.29878
A3/142	2013	2	2	dark yellow	27.8561	3.48458	0.263231	1.0137	17.3859	28.4093	5.86288	6.92857
T9/13	2013	2	2	dark yellow	27.6274	3.1012	0.365911	1.13002	12.8087	17.0968	6.4496	6.89035
A2/11	2013	1	2	dark yellow	27.491	4.27702	0.445066	1.01488	25.8474	29.4534	7.53199	5.63375
AGRIA	2013	1	2	dark yellow	27.431	3.36586	0.303686	0.824168	16.8874	30.8548	8.47149	6.07807
A9/4	2014	3	2	dark yellow	27.0082	5.70436	0.41113	1.61749	61.6564	49.1514	11.5076	9.056
A12/5	2014	3	1	light yellow	27.0074	3.07497	0.351907	1.05684	22.38	28.3867	7.54	7.07
A3/223	2013	2	2	dark yellow	26.9003	4.72723	0.241768	1.07648	13.7272	22.2207	6.50915	5.38879
A9/8	2013	1	2	dark yellow	26.8721	3.53945	0.209965	0.926943	17.0354	26.5209	7.38028	5.89434
MARFONA	2013	1	1	light yellow	26.6476	2.54845	0.355931	1.14609	20.821	38.2628	8.79175	7.28193
MARABEL	2013	3	1	light yellow	26.5738	3.51825	0.328886	1.26013	20.7172	23.2004	10.4615	7.06015
AGRIA	2013	3	2	dark yellow	26.5079	3.43954	0.300907	1.14685	25.6833	26.0267	8.26667	6.36
T10/8	2013	2	2	dark yellow	26.3865	2.65354	0.284411	1.12125	14.4012	17.7625	8.05659	6.90179
A3/346	2014	3	2	dark yellow	26.1359	5.63707	0.459473	1.50785	43.7197	38.3651	10.9287	7.8636
A13/3	2013	3	4	white	26.1315	2.95587	0.337664	1.27365	14.819	18.8523	5.69197	6.55502
A5/70	2013	3	4	white	26.0505	3.65775	0.353166	1.2146	21.8909	30.0389	6.27875	5.85837
SLANEY	2013	2	3	cream	26.0482	3.5804	0.321587	1.47308	18.3742	16.1667	8.02151	6.58062
AGRIA	2013	2	2	dark yellow	25.9942	3.28266	0.247224	1.05093	20.802	26.7735	6.88555	4.66444
T1/26	2013	3	1	light yellow	25.8882	3.49397	0.252021	1.53633	29.0679	35.4137	6.55226	8.2527
A5/6	2013	1	4	white	25.6929	1.59104	0.35944	1.07758	16.5237	26.3239	9.31028	7.86157
A3/189	2014	3	1	light yellow	25.5671	3.26375	0.336008	1.2449	22.5967	21.9367	7.29333	5.87
T1/26	2013	1	1	light yellow	25.4013	3.6404	0.42004	1.12155	23.532	35.85	9.18452	6.05641
A8/11	2013	3	1	light yellow	25.2247	3.02429	0.323336	1.20388	18.4118	22.1522	8.40473	5.90436
A10/15	2013	3	3	cream	25.1659	3.36273	0.313084	1.45738	17.2884	26.2179	6.58572	6.41597
A13/1	2013	1	4	white	25.1595	2.88705	0.275359	0.89241	16.1028	24.2307	6.68697	5.5356
A7/12	2014	3	3	cream	25.1582	2.72906	0.292267	1.06234	28.22	27.8533	8.14667	6.18333
T4/4	2013	2	1	light yellow	25.0102	3.84985	0.161315	1.23475	13.6532	28.9903	8.6363	5.82948
AGATA	2013	1	1	light yellow	24.9417	1.65695	0.341641	1.22049	19.238	44.4398	7.33097	6.04873
T4/4	2013	3	1	light yellow	24.9046	2.96528	0.363416	1.13803	19.4751	17.5886	6.96442	5.13675
AGATA	2013	3	1	light yellow	24.7014	3.58377	0.292245	1.48157	25.3082	23.3168	6.58003	7.24048
MARFONA	2013	2	1	light yellow	24.6597	3.60145	0.281598	1.30604	15.1843	17.2595	7.28571	7.79613
A3/110	2013	1	2	dark yellow	24.5828	4.1294	0.272186	1.1095	21.0899	26.2051	10.4972	7.8751
A3/29	2013	1	1	light yellow	24.5423	3.18139	0.284643	0.849845	14.436	18.9986	7.18238	3.64082
A3/346	2013	1	2	dark yellow	24.3822	3.61408	0.255732	0.863627	13.9629	26.3439	8.67847	4.40315
A9/4	2013	3	2	dark yellow	24.3423	3.25474	0.336401	1.54273	20.7642	20.4658	6.73692	5.42388
A1/58	2014	3	4	white	24.226	5.0302	0.641376	1.92483	42.6513	38.7992	12.6388	12.7375
A3/234	2013	1	1	light yellow	24.2175	2.65946	0.328067	1.06701	16.5099	25.1343	6.95587	7.57035
A1/9	2013	1	1	light yellow	24.1599	2.27803	0.34638	1.02094	21.8173	31.5712	9.15165	5.33095
A3/337	2013	1	1	light yellow	23.9512	3.14825	0.353706	1.00029	21.0417	32.525	9.94879	5.85347
T4/4	2013	1	1	light yellow	23.9029	2.56567	0.301154	0.981855	16.6545	30.4754	8.18555	5.40709
A3/351	2013	3	2	dark yellow	23.8608	3.77978	0.335483	1.567	17.6529	20.9045	6.61272	7.11612
MARABEL	2013	2	1	light yellow	23.8081	2.82006	0.349973	1.24885	15.9985	16.0871	9.43637	6.28824
A2/127	2013	3	1	light yellow	23.7425	3.80463	0.235456	1.67509	17.5756	25.0247	6.51218	8.64896
T6/28	2013	3	1	ligh yellow	23.5707	2.78587	0.297383	1.13454	20.1133	24.5967	9.29333	8.32333
A3/275	2013	2	1	light yellow	23.4876	2.50102	0.241196	0.968815	10.2492	22.1394	7.82388	5.59049
A1/58	2013	3	4	white	23.4627	4.48451	0.349464	1.83336	25.8461	37.5152	7.73006	10.1312
A3/368	2013	1	2	dark yellow	23.4579	1.91094	0.32565	1.06864	18.8692	25.7502	8.11587	6.72686
GRANOLA	2013	1	2	dark yellow	23.3869	2.23947	0.420674	1.08003	17.0426	26.6709	7.47323	4.25715
T9/11	2013	1	1	light yellow	23.2908	3.41242	0.294474	1.0236	14.8763	25.0197	7.11348	7.24258
A3/177	2013	3	1	light yellow	23.1972	2.57705	0.404772	1.29893	29.919	17.8901	7.58936	6.60307
T10/8	2013	1	2	dark yellow	23.027	2.43758	0.365223	0.865558	11.7447	25.7752	6.54175	5.6263
T5/14	2013	3	3	cream	23.0136	3.36495	0.232097	1.46101	19.8456	30.8798	8.51619	8.53994
A5/60	2013	3	3	cream	23.0005	3.37955	0.212866	1.34854	19.1658	24.9842	7.79367	6.97884
A3/29	2013	3	1	light yellow	22.9786	3.73663	0.377758	1.15262	22.0856	32.1146	10.2584	6.41947
A8/34	2014	3	4	white	22.8397	3.23447	0.315467	1.04679	18.0967	28.1633	6.26	5.62
A4/9	2013	3	3	cream	22.7861	3.34172	0.224466	1.26158	20.4576	25.6427	9.1777	7.6818
A13/1	2013	3	4	white	22.7547	2.75848	0.217843	1.40118	12.3137	21.6585	6.51083	6.81942
A5/98	2013	3	3	cream	22.7176	3.32847	0.271257	1.40351	24.8695	30.4049	5.95737	8.21292
A3/337	2013	3	1	light yellow	22.7122	3.36217	0.368349	1.22699	20.1452	17.7656	7.30158	6.56526
A3/234	2014	3	1	light yellow	22.66	5.13159	0.320149	1.72036	42.6514	48.0319	10.9338	10.6409
T11/10	2013	1	3	cream	22.567	2.5708	0.448641	0.948914	19.8972	37.4561	8.51145	4.45539
A3/223	2013	3	2	dark yellow	22.5445	3.51262	0.161027	1.03444	15.6804	18.5919	6.56726	6.27697
T5/4	2013	3	4	white	22.5437	3.66435	0.286577	1.28563	20.5928	19.133	8.47628	7.59477
A3/167	2013	3	1	light yellow	22.5279	2.65444	0.249091	1.19293	18.2147	20.3891	7.17629	6.35058
T9/13	2013	3	2	dark yellow	22.5234	3.6075	0.283996	1.33628	22.0063	24.7646	8.90397	5.98908
A3/234	2013	3	1	light yellow	22.4446	3.54954	0.133318	1.22067	19.7319	15.5349	7.64634	7.32818
A8/34	2013	2	4	white	22.392	3.71173	0.456949	1.452	8.27796	18.0245	7.40984	6.1744
A3/74	2013	1	2	dark yellow	22.3609	2.58591	0.467581	0.9088	17.561	21.2772	7.18324	4.14435
A13/1	2013	2	4	white	22.313	3.18672	0.271916	1.08686	16.9539	23.0311	7.34155	6.00338
A8/11	2013	1	1	light yellow	22.2708	3.29735	0.384857	0.838156	15.8266	32.4592	7.04522	5.68459
A3/142	2013	1	2	dark yellow	22.2041	3.14243	0.326497	0.99293	25.6667	21.2767	5.76667	6.74333
BB std	2013	3	4	white	22.1373	3.09817	0.335673	1.22302	18.6941	23.3829	7.8082	6.04909
T6/17	2013	3	1	light yellow	22.1372	3.5596	0.344873	1.3789	20.8467	32.1461	8.41042	8.48654
A3/346	2013	3	2	dark yellow	22.05	2.92649	0.29667	1.34091	17.8579	19.8152	7.54222	7.16462
A3/189	2013	1	1	light yellow	21.9917	2.45818	0.418566	0.886081	15.602	29.6061	7.69728	4.49289
A3/74	2013	3	2	dark yellow	21.927	3.43204	0.202627	1.53081	19.4293	21.3392	8.82457	7.18214
A2/73	2013	3	2	dark yellow	21.8753	3.72948	0.53026	1.29409	18.0208	22.8883	6.31127	7.23902
A3/368	2014	3	2	dark yellow	21.858	4.23146	0.388755	1.31345	37.4359	38.6114	10.3001	7.13679
A6/71	2013	3	1	light yellow	21.8144	3.20536	0.354897	1.45473	17.6614	23.5816	8.57325	6.46879
A3/223	2013	1	2	dark yellow	21.7838	1.84698	0.420471	0.957619	13.4156	20.0522	6.40839	5.73819
A3/108	2013	3	2	dark yellow	21.7772	3.25943	0.328277	1.13018	20.4651	26.5599	7.4756	7.33887
A3/142	2013	3	2	dark yellow	21.7274	3.15005	0.263411	1.494	24.9049	21.9107	8.33653	7.39789
A6/119	2013	1	1	light yellow	21.6685	2.59207	0.368758	0.857828	20.5261	25.1613	10.5913	5.43575
A3/110	2013	3	2	dark yellow	21.5952	2.96196	0.395482	1.45558	19.0967	18.5619	6.46868	6.70582
A3/37	2013	3	1	light yellow	21.5918	3.4557	0.414754	1.37003	22.3359	16.4341	7.22328	5.52408
A13/3	2013	1	4	white	21.514	3.12737	0.329692	0.863093	17.5683	27.1607	7.44497	6.23735
A6/103	2014	3	1	light yellow	21.3458	4.14525	0.329368	1.24997	38.5708	31.8972	9.58981	5.23247
A3/108	2014	3	2	dark yellow	21.305	3.99787	0.481048	1.29991	57.5	43.43	8.30883	8.24726
A3/321	2013	3	1	light yellow	21.2175	3.51133	0.24253	1.68142	21.6825	16.8843	8.55198	7.47968
A9/8	2013	3	2	dark yellow	21.0718	3.11643	0.310184	1.3534	16.8506	27.3573	6.90101	7.52484
A3/275	2013	3	1	light yellow	21.0604	3.60279	0.380385	1.3272	15.3553	24.496	6.55959	7.08311
A3/15	2014	3	2	dark yellow	21.0566	4.4397	0.447752	1.65865	35.1709	44.4941	9.60712	10.8788
A8/34	2013	1	4	white	21.0167	2.40707	0.267805	1.14348	13.7056	32.4195	9.26943	6.42067
A3/206	2013	3	2	dark yellow	20.9619	3.15935	0.232534	1.2647	12.4773	19.4258	6.2883	6.16432
A3/177	2014	3	1	light yellow	20.9518	4.10593	0.444528	1.31272	45.3856	36.6311	9.40304	7.14206
GRANOLA	2013	3	2	dark yellow	20.9495	3.72675	0.376209	1.82389	24.7511	30.168	6.19791	6.53846
A1/9	2013	3	1	light yellow	20.7355	3.57929	0.283721	1.67998	26.5792	26.2776	6.91281	8.55028
A3/337	2014	3	1	light yellow	20.7139	4.21578	0.494857	1.38123	42.0017	29.6018	10.6253	8.70312
A3/164	2013	3	1	light yellow	20.6484	3.2467	0.247788	1.47568	26.7196	27.6188	6.31151	7.82828
A6/103	2013	3	1	light yellow	20.4633	3.31242	0.253851	1.33794	15.9698	24.5506	7.32758	7.33034
AGRIA	2014	3	2	dark yellow	20.2947	4.1704	0.317028	1.58723	36.3169	28.4306	8.65445	6.89994
T6/3	2013	3	1	light yellow	20.2641	2.84524	0.283082	1.33722	22.7861	22.5275	6.46074	8.78778
A3/275	2014	3	1	light yellow	20.1253	3.83339	0.324357	1.45071	35.2112	29.5417	9.86446	8.12083
MARABEL	2013	1	1	light yellow	20.1086	1.18186	0.409674	1.23402	20.2794	31.755	5.85266	5.35535
A5/70	2014	3	4	white	20.1081	3.96924	0.528659	1.26387	38.7454	38.5233	12.6386	8.06367
A3/368	2013	3	2	dark yellow	20.0628	3.28235	0.282514	1.36853	17.3917	21.5089	7.13204	6.54077
A6/76	2013	3	3	cream	19.971	3.02117	0.368778	1.26489	34.8185	24.0106	6.50846	5.92018
A2/73	2014	3	2	dark yellow	19.9115	3.7092	0.529921	1.25022	46.7763	35.8754	8.14895	6.58722
A5/70	2013	1	4	white	19.8714	2.69646	0.282578	0.964794	15.8284	29.8573	7.71356	5.74385
A3/26	2013	3	1	light yellow	19.8548	2.80496	0.240212	1.3489	18.6061	22.3475	5.95352	7.03605
A4/9	2014	3	3	cream	19.8477	4.13419	0.302732	1.42618	52.8806	26.7374	12.3576	8.82565
BB std	2013	1	4	white	19.7467	2.58766	0.289208	0.628594	17.7278	20.5926	5.87461	4.4434
MARABEL	2014	3	1	light yellow	19.6652	3.2908	0.329573	1.3459	28.98	22.2533	9.80667	7.0747
T9/11	2013	3	1	light yellow	19.6444	3.10526	0.456369	1.47288	9.69429	24.5231	5.91879	7.93941
A6/119	2013	3	1	light yellow	19.6156	3.03566	0.329883	1.53686	21.4453	21.8672	6.71748	7.30089
T6/28	2014	3	1	ligh yellow	19.4355	2.80439	0.352807	1.01306	23.6533	30.5633	8.42333	8.81667
LADY CLAIRE	2013	1	1	light yellow	19.361	2.90869	0.281129	0.901756	18.1825	28.018	5.43453	6.07817
AGATA	2014	3	1	light yellow	19.3468	3.62912	0.352246	1.28	44.9923	32.2268	8.95051	7.20684
A7/12	2013	3	3	cream	19.3411	3.00724	0.33641	1.18975	25.7362	29.3727	7.64725	5.57654
A3/37	2013	1	1	light yellow	19.2038	2.54674	0.336759	0.843217	12.4073	26.7484	7.3518	5.07313
A5/98	2014	3	3	cream	19.1748	3.69274	0.482489	1.7677	43.6418	30.9892	9.66523	10.122
LADY CLAIRE	2013	3	1	light yellow	19.1557	3.09938	0.272712	1.39598	16.7183	27.7726	6.61824	6.49796
A8/34	2013	3	4	white	19.1392	2.97886	0.303943	1.24405	14.4215	19.9741	5.0784	5.55653
A6/119	2014	3	1	light yellow	19.1359	3.49415	0.458798	1.18599	43.281	36.0626	8.8567	6.80913
T10/8	2013	3	2	dark yellow	19.032	3.59394	0.324659	1.33863	17.5809	23.5408	6.73347	7.61975
SLANEY	2013	1	3	cream	18.9901	2.65274	0.388798	1.02872	16.4243	29.3693	7.17432	5.43119
A6/71	2014	3	1	light yellow	18.9769	3.00566	0.347441	1.13806	21.9367	30.8567	7.60467	6.92333
A5/6	2013	3	4	white	18.879	3.19649	0.38071	1.51649	12.5706	26.3377	5.73041	6.61156
A6/76	2014	3	3	cream	18.8322	3.17623	0.314808	1.49343	29.5324	39.1218	8.55887	8.47678
T11/10	2013	3	3	cream	18.6951	3.37084	0.36104	1.4488	21.8388	24.6571	5.24387	5.75243
A3/177	2013	1	1	light yellow	18.6072	3.16084	0.432871	0.839793	13.4106	21.5481	7.03543	5.57365
A12/5	2013	1	1	light yellow	18.5665	2.21179	0.345565	0.852838	17.3931	22.519	6.51453	5.30973
A9/4	2013	1	2	dark yellow	18.5027	1.83054	0.338063	1.0024	16.1098	32.4553	7.48969	6.88436
A3/108	2013	1	2	dark yellow	18.327	3.46605	0.337917	0.942137	30.1733	19.7533	8.20333	6.53667
HERMES	2013	3	1	light yellow	18.2564	3.0063	0.265118	1.3355	15.6113	22.4879	4.49116	6.92226
A3/26	2014	3	1	light yellow	18.2311	3.80489	0.409866	1.50599	57.3368	39.5324	9.7195	9.42406
A2/99	2013	3	1	light yellow	18.2271	2.97326	0.271125	1.00737	21.5233	26.4163	5.53995	5.42049
A1/58	2014	2	4	white	18.1819	4.86708	0.387075	1.67245	40.6697	25.9246	9.6698	11.2568
A3/26	2014	2	1	light yellow	18.123	3.77757	0.272586	1.35697	44.7048	21.0008	9.892	8.77167
A8/11	2014	3	1	light yellow	17.9921	3.82106	0.394145	1.60068	33.8378	39.1433	7.74074	6.4988
A3/29	2014	3	1	light yellow	17.9892	3.47222	0.476429	1.18947	41.5735	25.5207	8.5349	6.26487
A1/9	2014	3	1	light yellow	17.9448	3.84933	0.317103	1.4682	32.0467	26.0933	8.98	9.91667
A3/206	2014	2	2	dark yellow	17.9192	3.5333	0.307439	1.3202	33.0156	21.1457	8.62079	7.92773
A5/6	2014	3	4	white	17.879	3.3204	0.36076	1.42011	33.2909	37.2918	8.78947	7.89985
A10/15	2014	2	3	cream	17.549	3.12858	0.358154	1.3259	36	22.8478	11.3741	8.64963
A3/15	2013	3	2	dark yellow	17.4872	2.5864	0.33555	1.09333	13.971	19.2455	5.68859	5.40659
A4/9	2014	1	3	cream	17.4456	2.81013	0.34115	1.24016	24.647	19.9708	7.24966	7.96436
GRANOLA	2014	3	2	dark yellow	17.4388	3.50666	0.444212	1.14527	42.9303	38.9087	10.1897	5.48421
A3/351	2014	3	2	dark yellow	17.3225	3.65052	0.41837	1.58438	37.6521	35.1542	10.8093	9.12005
T1/26	2014	3	1	light yellow	17.2574	3.44924	0.45833	1.26857	40.4056	33.2692	8.36467	8.20748
A4/9	2014	2	3	cream	17.2087	3.67587	0.368402	1.35885	51.6122	28.8479	11.0402	9.37577
A5/98	2014	1	3	cream	17.1456	3.11601	0.33774	1.17267	32.6743	16.9289	4.39472	8.42098
MARFONA	2013	3	1	light yellow	16.9326	3.082	0.337183	1.0573	30.1667	27.72	8.61733	6.27
AGRIA	2014	2	2	dark yellow	16.8419	3.23082	0.323182	1.44904	43.8538	26.4675	8.73022	6.95939
MARFONA	2014	3	1	light yellow	16.7714	3.56477	0.3767	1.39733	35.3335	31.5385	11.7645	7.94343
A3/116	2014	3	3	cream	16.7378	3.58891	0.634279	1.28124	34.9477	34.2885	7.41042	7.30471
HERMES	2013	1	1	light yellow	16.6605	3.32559	0.27544	0.952375	22.7326	42.7875	8.88492	7.51408
A10/15	2014	3	3	cream	16.6319	3.23093	0.365167	1.44943	51.5553	27.4819	10.4125	9.70239
A6/76	2014	2	3	cream	16.6184	3.74729	0.297447	1.19182	34.2458	22.0432	10.5068	8.47805
T5/32	2014	2	4	white	16.58	2.57362	0.373399	1.37061	43.1151	26.3486	11.5205	8.48775
A13/3	2014	1	4	white	16.5457	2.83481	0.25074	0.640432	33.5844	16.7157	4.51881	7.31161
T5/14	2014	3	3	cream	16.4753	3.46664	0.281888	1.31722	39.0987	30.1623	8.85482	7.85424
A6/119	2014	1	1	light yellow	16.3275	2.49026	0.246492	0.926419	26.839	19.6644	9.74109	7.68514
A3/110	2014	3	2	dark yellow	16.3221	3.91415	0.443806	1.57424	47.4816	36.7747	11.6194	8.73899
T11/10	2014	2	3	cream	16.3211	4.06693	0.401361	1.22888	40.3248	26.8132	9.26482	6.92257
A2/99	2014	2	1	light yellow	16.2912	3.9366	0.385883	1.37689	52.9576	25.6452	11.1168	8.89709
A3/37	2014	3	1	light yellow	16.2311	2.8088	0.334781	1.44933	37.0879	39.0872	6.52453	7.27083
A5/60	2014	3	3	cream	16.2309	3.23652	0.36296	1.36195	31.7533	35.3226	9.28667	9.35716
A1/9	2014	1	1	light yellow	16.2119	3.71684	0.548517	1.23525	35.277	21.5284	11.536	9.79256
T4/4	2014	3	1	light yellow	16.1845	3.37178	0.473436	1.48072	43.5673	36.8857	8.49908	9.28223
A2/11	2014	2	2	dark yellow	16.1747	3.47479	0.31615	1.4563	37.9823	24.8066	7.72108	8.35541
T5/4	2014	1	4	white	16.1496	2.83786	0.367571	1.12302	21.2158	28.8589	7.6	4.98587
A3/15	2014	1	2	dark yellow	16.0961	3.64122	0.635924	0.85857	39.531	20.0757	11.691	8.551
A12/5	2014	2	1	light yellow	15.9942	2.88485	0.383946	1.07147	38.8933	23.4591	6.57768	6.44356
AGATA	2014	2	1	light yellow	15.989	3.44748	0.403292	1.52459	33.3111	25.3483	8.55077	7.67011
T9/13	2014	3	2	dark yellow	15.9671	3.39677	0.379173	1.33779	46.5279	30.6549	9.74245	8.28665
T5/4	2014	3	4	white	15.8878	2.85252	0.428995	1.19884	28.1158	28.3035	6.9396	7.42336
T5/14	2014	1	3	cream	15.8801	3.4395	0.30503	1.13791	14.7672	17.4676	9.756	8.8423
A13/1	2014	1	4	white	15.8586	2.50253	0.331583	0.816906	14.9404	13.7879	8.59967	5.31915
T9/11	2014	1	1	light yellow	15.7862	3.06954	0.194348	1.02271	9.03076	11.9508	4.53809	7.36761
A3/74	2014	3	2	dark yellow	15.7782	2.55473	0.438154	1.15594	42.5893	22.3635	8.12329	7.69617
A3/234	2014	1	1	light yellow	15.7466	2.54815	0.26956	0.871497	28.3141	11.2854	6.61	7.58361
T6/17	2014	3	1	light yellow	15.7411	3.60899	0.42646	1.45267	34.6694	28.7064	7.32275	6.43923
T11/10	2014	3	3	cream	15.6468	3.15072	0.273209	1.24716	37.6105	29.6408	8.16732	8.36499
A2/73	2014	2	2	dark yellow	15.6382	2.94507	0.520599	1.20219	32.4252	21.649	8.8463	7.33363
A2/73	2014	1	2	dark yellow	15.6079	2.75721	0.267482	0.981276	10.1773	28.76	3.63755	7.85679
A2/127	2014	3	1	light yellow	15.5744	3.2085	0.475196	1.05135	47.7524	31.0835	9.26743	6.90387
BB std	2014	3	4	white	15.441	2.83666	0.333506	0.870031	28.8464	20.0592	6.47669	5.37577
MARFONA	2014	2	1	light yellow	15.3642	3.33904	0.275042	1.29599	33.3559	23.1005	9.43228	8.53141
A8/34	2014	1	4	white	15.3606	3.28475	0.300237	1.05763	25.9285	22.5839	11.6777	5.60459
A10/15	2014	1	3	cream	15.3604	3.13199	0.293477	1.04931	26.1893	16.9923	11.5953	9.04033
SLANEY	2014	3	3	cream	15.3471	2.72873	0.334473	1.21049	30.0534	34.9638	6.85275	6.85571
A3/142	2014	3	2	dark yellow	15.3439	2.75037	0.364678	1.17177	43.2935	23.1166	8.5057	8.21716
A3/223	2014	3	2	dark yellow	15.314	3.56966	0.342842	1.28675	23.7948	24.3913	8.89077	7.04851
A3/15	2014	2	2	dark yellow	15.29	2.76622	0.3516	1.0697	45.0643	26.8387	9.40657	7.53257
A3/74	2014	2	2	dark yellow	15.2484	2.76002	0.417456	1.16377	51.8068	28.6806	8.2867	7.52554
T10/8	2014	3	2	dark yellow	15.2021	3.19182	0.473552	1.23477	49.0093	28.4187	7.80946	6.33351
A5/98	2014	2	3	cream	15.1186	2.88989	0.479587	1.65764	51.6999	33.7459	8.48238	9.49904
A13/1	2014	3	4	white	15.0457	2.78124	0.324588	1.09709	36.7219	26.1093	5.78111	6.67919
A3/116	2014	1	3	cream	14.9684	3.1813	0.351745	0.690752	30.3597	29.5484	5.62206	5.30066
A3/337	2014	1	1	light yellow	14.9672	3.10703	0.559437	0.983428	45.1264	22.1482	10.4663	8.76091
A3/234	2014	2	1	light yellow	14.9254	3.00348	0.44604	0.87237	33.018	28.1429	9.08601	6.35236
A2/11	2014	1	2	dark yellow	14.8664	2.74777	0.36761	1.32234	26.6192	20.8751	9.29442	8.62239
A3/108	2014	2	2	dark yellow	14.7878	4.05765	0.400014	1.07259	60.5958	32.1461	10.5036	8.34582
LADY CLAIRE	2014	3	1	light yellow	14.7584	3.57446	0.269554	1.32378	35.7266	43.7473	7.78681	7.8503
A2/127	2014	1	1	light yellow	14.7435	3.04663	0.47937	1.01526	21.0876	29.0355	6.3537	6.26456
MARABEL	2014	2	1	light yellow	14.7414	3.1179	0.427166	1.65171	37.4924	21.5267	10.1898	7.42287
A13/3	2014	2	4	white	14.7357	2.11067	0.203806	0.97128	36.9071	15.8765	6.9634	5.20003
A3/321	2014	2	1	light yellow	14.7338	3.27439	0.288147	1.65821	39.9096	21.9828	10.5323	7.45745
GRANOLA	2014	1	2	dark yellow	14.7029	3.70588	0.42259	1.1215	33.1012	21.2298	9.60656	6.76
A7/12	2014	2	3	cream	14.6985	2.3859	0.242852	0.833942	30.2777	19.9087	7.23899	5.87041
A2/127	2014	2	1	light yellow	14.5879	3.06895	0.343525	1.08612	29.6494	21.2441	6.58478	6.41227
A3/164	2014	3	1	light yellow	14.4561	3.14116	0.435984	1.12415	35.2515	30.5943	9.53749	7.39374
A3/177	2014	2	1	light yellow	14.35	3.71033	0.581405	1.37423	44.0396	21.848	9.74146	10.7329
A1/9	2014	2	1	light yellow	14.3304	3.41907	0.256711	1.42809	37.9692	31.4641	10.3712	10.0096
A3/321	2014	3	1	light yellow	14.2722	3.60469	0.323926	1.55357	36.5581	30.1609	8.31553	9.29344
MARABEL	2014	1	1	light yellow	14.2097	3.24181	0.360505	1.29147	22.0697	28.4455	8.02564	7.65119
T6/3	2014	3	1	light yellow	14.1541	2.63553	0.310282	1.09742	30.1216	20.6696	6.38095	6.51282
A6/71	2014	2	1	light yellow	14.1523	2.88652	0.222164	1.00612	42.6214	24.6934	7.52986	7.11421
A12/5	2014	1	1	light yellow	14.1265	3.22277	0.326953	1.06031	35.9735	25.3303	10.4612	7.40329
T5/4	2014	2	4	white	14.088	3.12841	0.357564	1.25482	35.4669	25.8674	9.42194	6.34717
LADY CLAIRE	2014	2	1	light yellow	13.8697	3.07355	0.315988	1.2525	25.3358	26.4008	9.25801	7.92092
HERMES	2014	3	1	light yellow	13.7367	2.98745	0.276603	1.11158	24.4372	22.506	6.3724	5.78541
A7/12	2014	1	3	cream	13.7142	2.32752	0.18818	0.850383	11.8275	36.4743	10.3223	4.62659
A5/6	2014	1	4	white	13.6479	2.58889	0.306032	0.857326	11.2224	12.2955	4.55653	7.64739
A8/11	2014	2	1	light yellow	13.6436	3.45459	0.411659	1.33842	38.1128	26.2321	9.22253	8.62836
A3/110	2014	1	2	dark yellow	13.5965	2.61296	0.266653	0.740737	17.9639	12.2317	5.68761	6.75124
A3/189	2014	1	1	light yellow	13.5607	2.50492	0.35336	0.890945	24.4957	19.433	8.97398	7.10459
A5/6	2014	2	4	white	13.5152	2.98801	0.396381	1.21067	45.8734	24.8743	7.38371	8.62549
T6/17	2014	2	1	light yellow	13.5033	3.34524	0.371176	1.34861	44.2629	25.9579	9.58614	9.02169
T9/11	2014	3	1	light yellow	13.4972	2.18217	0.367786	0.964868	40.6263	31.8926	6.7652	5.62289
A5/70	2014	1	4	white	13.4162	2.53599	0.391553	0.961367	27.3619	23.3142	9.46667	7.6732
T6/28	2014	2	1	ligh yellow	13.387	3.0351	0.258824	1.2619	29.1957	29.764	7.86051	8.65759
A3/164	2014	2	1	light yellow	13.3655	2.87075	0.281701	1.03525	39.4862	28.4076	7.95811	7.30693
A3/37	2014	2	1	light yellow	13.3532	2.93125	0.351982	1.07698	31.6884	31.2302	9.43329	7.22272
T11/10	2014	1	3	cream	13.3388	3.49998	0.357958	1.18391	15.957	24.6989	6.69061	7.33651
A1/58	2014	1	4	white	13.3264	3.00108	0.346169	0.857531	20.843	16.879	8.328	6.54233
A3/337	2014	2	1	light yellow	13.3147	3.128	0.243582	0.976725	45.2695	27.348	9.52981	7.54947
A9/8	2014	1	2	dark yellow	13.2809	3.40211	0.282168	0.941425	29.1812	18.4398	7.34701	8.49864
A5/60	2014	1	3	cream	13.2733	2.58248	0.340955	0.811097	25.7685	22.1485	6.27569	6.88441
T4/4	2014	2	1	light yellow	13.252	2.60242	0.246151	1.01777	24.4586	18.5955	7.62317	6.26431
AGRIA	2014	1	2	dark yellow	13.2443	3.41694	0.455486	1.5355	26.796	20.9253	8.97731	7.42765
A3/351	2014	2	2	dark yellow	13.2351	3.09471	0.376267	1.33896	33.2204	33.5632	8.31215	7.3793
A3/223	2014	2	2	dark yellow	13.0867	3.67357	0.367603	1.06803	49.121	22.4302	8.65603	7.42606
A9/4	2014	1	2	dark yellow	13.0497	3.05082	0.29776	0.82108	24.5402	25.1264	9.46207	5.52975
T9/11	2014	2	1	light yellow	13.0287	3.08391	0.387171	1.10959	45.8606	26.7793	8.28083	6.68484
A3/351	2014	1	2	dark yellow	12.9541	2.9084	0.373991	1.14962	31.4937	22.318	10.5933	8.11467
A3/275	2014	2	1	light yellow	12.947	2.85337	0.232686	1.30593	31.6556	27.5164	7.91356	9.35481
T5/14	2014	2	3	cream	12.9357	3.08358	0.293071	1.15027	33.7101	26.1655	9.25799	7.80016
A3/275	2014	1	1	light yellow	12.8893	3.32856	0.433018	1.22236	32.7838	17.6778	10.0353	7.9291
A3/110	2014	2	2	dark yellow	12.8874	3.10302	0.258631	1.23971	41.7808	35.1666	8.42025	8.44707
A3/189	2014	2	1	light yellow	12.8736	2.94725	0.292714	1.0329	23.2404	27.664	8.44521	6.50716
A5/60	2014	2	3	cream	12.8529	2.92501	0.214449	1.16894	38.6298	24.6167	8.51258	8.68671
T1/26	2014	1	1	light yellow	12.8492	3.66377	0.407304	1.1572	30.0152	20.6647	7.745	9.23889
T6/17	2014	1	1	light yellow	12.8198	3.3559	0.127079	1.05719	9.65837	33.8343	4.82635	8.11793
MARFONA	2014	1	1	light yellow	12.8	3.6511	0.300399	1.33728	24.1125	20.7319	6.53258	7.71766
A3/167	2014	3	1	light yellow	12.7874	2.84393	0.377536	1.16454	38.337	30.8223	8.17715	6.63008
A3/164	2014	1	1	light yellow	12.7619	2.7841	0.340847	0.995323	29.7343	16.504	9.65733	9.304
A6/71	2014	1	1	light yellow	12.7058	3.16154	0.300106	0.829816	22.5195	12.9075	3.29799	6.30448
SLANEY	2014	2	3	cream	12.6617	3.48888	0.300877	1.24573	51.4527	35.8383	8.70826	8.27888
A3/29	2014	2	1	light yellow	12.6185	2.56107	0.336514	1.13456	46.9447	22.9255	6.58531	6.67028
A3/116	2014	2	3	cream	12.6013	3.29955	0.215322	1.04451	48.015	24.4256	8.53993	6.94056
A6/119	2014	2	1	light yellow	12.5742	2.821	0.229363	0.925858	45.1609	33.4577	7.44778	7.09648
A13/1	2014	2	4	white	12.5481	2.69591	0.179583	0.951314	35.071	17.6093	6.87696	6.05873
AGATA	2014	1	1	light yellow	12.4989	3.2348	0.453087	1.5076	28.1449	17.1899	9.38132	7.78847
BB std	2014	2	4	white	12.4958	2.83676	0.302201	1.05453	30.8651	19.7342	7.8538	7.5408
A3/108	2014	1	2	dark yellow	12.488	3.77974	0.4248	0.768841	33.9263	16.2843	9.33267	6.241
A3/167	2014	2	1	light yellow	12.3969	2.68301	0.264361	1.13438	40.4951	20.1435	8.80129	8.41593
LADY CLAIRE	2014	1	1	light yellow	12.3813	2.51789	0.305833	0.949371	15.4653	23.0806	7.79769	5.78588
A13/3	2014	3	4	white	12.3547	2.80405	0.337113	1.1334	33.5024	31.4166	6.52951	4.75815
T5/32	2014	3	4	white	12.1964	2.56533	0.301878	0.971915	31.8754	21.0163	4.30102	5.18048
A8/11	2014	1	1	light yellow	12.1064	2.9408	0.282589	1.07363	22.5918	14.2653	9.87465	6.73904
T9/13	2014	2	2	dark yellow	12.0916	2.7546	0.31086	1.40225	49.3108	29.0603	9.11145	9.39769
T1/26	2014	2	1	light yellow	11.9726	3.15684	0.240682	1.22911	35.2439	24.4857	9.58263	9.14619
A3/142	2014	2	2	dark yellow	11.9222	3.12384	0.243077	1.11712	26.0235	29.8352	8.14244	7.05053
A3/346	2014	2	2	dark yellow	11.8707	2.87996	0.203813	1.08532	46.6271	25.3692	9.09084	7.44006
T6/28	2014	1	1	ligh yellow	11.8271	2.24653	0.289484	0.804194	15.5633	17.6586	8.59132	7.86052
A3/29	2014	1	1	light yellow	11.7763	2.13238	0.33019	0.80155	25.5669	9.58168	5.09244	5.77982
A2/99	2014	3	1	light yellow	11.7733	2.50131	0.363096	1.12148	24.4804	28.5125	7.91238	7.08316
T10/8	2014	1	2	dark yellow	11.7528	2.45421	0.327071	0.63023	16.0831	17.5873	8.52349	4.47807
A6/103	2014	2	1	light yellow	11.7266	2.46389	0.37532	1.05709	44.7858	24.8371	7.48406	6.30116
T5/32	2014	1	4	white	11.5693	3.33069	0.385226	1.16391	19.1237	15.6842	5.05224	6.74575
T9/13	2014	1	2	dark yellow	11.5463	2.63947	0.253509	0.780803	24.9794	17.6718	9.29889	6.51208
BB std	2014	1	4	white	11.3558	2.54217	0.239591	0.764096	16.3495	13.9573	5.35026	6.40824
A2/99	2014	1	1	light yellow	11.1546	3.3153	0.398789	0.857166	15.9262	19.2022	6.23092	4.59744
A6/103	2014	1	1	light yellow	11.1116	3.15397	0.321671	0.804903	17.8777	12.2097	7.49619	7.56497
A5/70	2014	2	4	white	11.0478	2.73029	0.26721	1.08423	38.7794	23.105	8.65474	8.61886
A9/8	2014	2	2	dark yellow	11.0339	2.98801	0.30501	1.03777	35.2788	16.5068	8.20415	7.86494
A3/37	2014	1	1	light yellow	10.8296	2.25559	0.294275	0.740858	36.6837	13.8783	7.68746	6.66244
A3/321	2014	1	1	light yellow	10.7768	2.69421	0.334152	1.22344	21.3729	32.1834	7.63813	7.66077
T6/3	2014	2	1	light yellow	10.7743	2.47519	0.292081	0.992211	50.3009	27.458	8.29792	7.38403
A3/368	2014	1	2	dark yellow	10.7573	2.98682	0.270941	0.666937	24.0695	10.4423	8.375	6.66535
A3/206	2014	1	2	dark yellow	10.5437	2.82134	0.323739	1.09229	25.2435	22.5042	4.87514	6.24836
T10/8	2014	2	2	dark yellow	10.5045	2.83584	0.279781	1.20577	35.513	33.5092	7.54907	6.47281
HERMES	2014	2	1	light yellow	10.4971	3.00259	0.351099	1.33203	34.2289	29.6662	5.39375	6.74815
A3/167	2014	1	1	light yellow	10.4807	2.56528	0.28846	0.650108	11.0575	9.55403	4.50589	4.52347
A3/74	2014	1	2	dark yellow	10.4591	1.78282	0.298962	0.781572	17.1128	8.7283	6.5756	6.297
A3/142	2014	1	2	dark yellow	10.4578	2.87127	0.444716	0.920604	29.2821	13.3914	5.37397	6.76761
A3/368	2014	2	2	dark yellow	10.1239	2.4204	0.210796	0.938996	38.9459	17.2577	7.64844	6.85766
A9/4	2014	2	2	dark yellow	10.0474	2.11128	0.306421	0.986642	56.8035	26.042	6.58882	6.85262
HERMES	2014	1	1	light yellow	10.047	2.30111	0.257426	0.75833	28.645	14.959	8.69467	7.48567
A8/34	2014	2	4	white	9.93891	3.37228	0.240912	1.11448	32.5676	27.6193	6.89453	6.85983
T6/3	2014	1	1	light yellow	9.88222	2.85182	0.31018	0.840096	35.5648	13.1775	5.65677	6.8163
GRANOLA	2014	2	2	dark yellow	9.84273	3.31422	0.331809	1.20167	37.8241	34.6491	9.08281	5.83938
A3/346	2014	1	2	dark yellow	9.76204	2.90108	0.207065	0.634278	19.4384	12.6349	5.52553	4.83792
A3/177	2014	1	1	light yellow	9.7174	2.19952	0.357698	0.773706	23.985	15.4577	9.588	6.15633
A6/76	2014	1	3	cream	8.90135	2.84997	0.308885	0.810407	19.1467	12.2949	5.99163	4.88411
A3/223	2014	1	2	dark yellow	8.78626	2.74131	0.212533	0.764732	12.1212	10.4274	3.58187	5.40273
SLANEY	2014	1	3	cream	8.53626	2.58559	0.212098	0.734498	15.2254	9.04426	9.08958	6.70681
