# Supplementary material for: Mineral nutrient variability of potato (Solanum tuberosum L.) tubers with different colors grown in Niksar, Kazova and Artova locations of Tokat Province, Turkey
Source: PeerJ. 2023 Jun 9;11:e15262. doi: 10.7717/peerj.15262 (PMC10259439; doi:10.7717/peerj.15262)
Supplement: Data S2 — All data obtained in statistical analysis; correlation test and ANOVA analysis. [file peerj-11-15262-s002.xlsx]

## Sheet: all data
Clone No	Rep	Year	Loc.	Color Code	COLOR	K mg/kg	P mg/kg	Ca mg/kg	Mg mg/kg	Fe mg/kg	Zn mg/kg	Cu mg/kg	Mn mg/kg
A3/116	1	2013	1	3	cream	29016.4	2396.52	261.066	668.033	23.2582	24.0328	6.45492	6.30328
A3/116	2	2013	1	3	cream	34908.9	3073.86	230.724	815.608	20.4909	31.9055	5.71147	7.97637
A3/116	3	2013	1	3	cream	30587.3	3658.24	203.54	965.27	18.44	28.24	7.55	6.52
A3/116	1	2014	1	3	cream	15746.3	3399.51	304.976	761.073	31.3171	26.1463	5.07317	5.56098
A3/116	2	2014	1	3	cream	13863.5	2986.3	316.544	639.47	27	30.309	5.793	4.436
A3/116	3	2014	1	3	cream	15295.2	3158.09	433.714	671.714	32.762	32.19	6	5.905
A3/116	1	2013	2	3	cream	30735.4	3159.58	460.83	1440.82	14.8074	19.3497	6.03	6.4032
A3/116	2	2013	2	3	cream	43323.3	3727.91	382.53	1348.39	17.1687	25.8193	7.35	7.73092
A3/116	3	2013	2	3	cream	37213	3515.79	429.474	1231.08	14.4361	22.8346	8.31	6.51629
A3/116	1	2014	2	3	cream	10128.7	3005.94	202.376	900.99	51.4851	27.3267	8.0198	6.83168
A3/116	2	2014	2	3	cream	12458.3	3325.67	189.32	1085.27	48.55	24.87	8.55	6.87
A3/116	3	2014	2	3	cream	15216.8	3567.05	254.27	1147.28	44.01	21.08	9.05	7.12
A3/116	1	2013	3	3	cream	31014.3	4242.83	308.607	1327.87	33.1967	18.6475	7.27459	9.11885
A3/116	2	2013	3	3	cream	27693.5	3907.79	338.078	1462.6	26.6883	14.8571	6.75325	8.50649
A3/116	3	2013	3	3	cream	25615.3	4007.03	325.013	1597.19	25.0126	21.5419	8.03616	9.6434
A3/116	1	2014	3	3	cream	16199.9	3489.36	625.532	1403.27	33.7872	32.5581	5.83869	6.8283
A3/116	2	2014	3	3	cream	15369.4	3382.94	613.287	1240.46	32.9202	37.1839	7.93257	7.33763
A3/116	3	2014	3	3	cream	18644.1	3894.43	664.019	1200	38.1356	33.1235	8.46	7.74818
A4/9	1	2013	1	3	cream	37941.3	2075.37	241.943	1038.67	14.8148	45.3968	6.34921	6.15681
A4/9	2	2013	1	3	cream	36599.8	1619.86	279.639	1185.56	17.3521	42.327	5.01505	7.42227
A4/9	3	2013	1	3	cream	38706.7	1864.97	342.464	1128.31	18.0244	44.7047	7.16	5.49898
A4/9	1	2014	1	3	cream	14963.7	3008.23	331.622	1149.64	23.995	19.177	7.65	8.266
A4/9	2	2014	1	3	cream	17498.8	2636.94	375.948	1316.53	21.7159	19.1953	5.42899	7.07707
A4/9	3	2014	1	3	cream	19874.3	2785.21	315.88	1254.32	28.23	21.54	8.67	8.55
A4/9	1	2013	2	3	cream	27407.8	3017.19	224.364	1077.4	12.4675	23.0649	10.5974	7.58442
A4/9	2	2013	2	3	cream	35392.6	3728.31	304.959	1421.49	21.9008	32.1281	9.09091	8.05785
A4/9	3	2013	2	3	cream	32145	3415.27	258.36	1254.94	18.03	27.34	8.55	7.83
A4/9	1	2014	2	3	cream	19310	3988.14	380.952	1384.84	50.0486	32.1108	12.1477	9.71817
A4/9	2	2014	2	3	cream	18050.9	3391.26	402.808	1210.75	49.3663	25.252	10.1776	9.50552
A4/9	3	2014	2	3	cream	14265.1	3648.19	321.446	1480.96	55.4217	29.1807	10.7952	8.90361
A4/9	1	2013	3	3	cream	21492.7	3394.91	194.483	1111.45	21.9869	23.6157	8.2703	6.95915
A4/9	2	2013	3	3	cream	22054.2	3032.19	242.974	1386.82	17.0669	26.1625	9.50434	8.48237
A4/9	3	2013	3	3	cream	24811.6	3598.07	235.942	1286.47	22.3188	27.1498	9.75845	7.60386
A4/9	1	2014	3	3	cream	19707.7	4114.95	248.563	1407.7	52.2163	29.0307	12.4696	8.67024
A4/9	2	2014	3	3	cream	19206	4159.8	294.541	1441.19	55.7816	28.3871	12.1092	9.03226
A4/9	3	2014	3	3	cream	20629.5	4127.8	365.093	1429.66	50.6438	22.7945	12.494	8.77444
T5/14	1	2013	1	3	cream	33258.2	2547.21	285.25	1124.36	17.35	22.54	7.99	8.55
T5/14	2	2013	1	3	cream	30258.1	2785.21	247.36	1205.87	13.55	22.17	8.55	7.25
T5/14	3	2013	1	3	cream	34053	2252.87	208.326	1016.49	19.3903	20.87	9	7.3963
T5/14	1	2014	1	3	cream	11992.1	3058.18	283.531	1097.63	15.178	13.215	10.848	9.862
T5/14	2	2014	1	3	cream	18652	3689.29	278.872	1154.88	13.2887	17.5813	9.68	8.79541
T5/14	3	2014	1	3	cream	16996.2	3571.02	352.687	1161.23	15.8349	21.6065	8.74	7.86948
T5/14	1	2013	2	3	cream	42429.8	3679.57	266.989	1323.33	7.55082	12.4879	7.26041	6.67957
T5/14	2	2013	2	3	cream	37398.5	3335.07	217.274	1135.28	12.7992	24.0375	6.76379	7.90843
T5/14	3	2013	2	3	cream	35478.2	3004.55	253.14	1247.31	10.25	18.57	6.99	7.54
T5/14	1	2014	2	3	cream	10655.7	3324.98	297.975	1051.11	34.9662	27.2903	8.61	8.10029
T5/14	2	2014	2	3	cream	14160.3	2766.22	325.763	1217.56	36.1641	24.8931	9.54198	7.34733
T5/14	3	2014	2	3	cream	13991.2	3159.55	255.474	1182.13	30	26.3132	9.62199	7.95287
T5/14	1	2013	3	3	cream	22355.3	3529.34	264.172	1377.05	20.1597	33.8323	7.48503	9.78044
T5/14	2	2013	3	3	cream	20811.4	3107.3	196.349	1477.69	17.6471	30.2272	8.82353	7.09939
T5/14	3	2013	3	3	cream	25874.2	3458.21	235.77	1528.31	21.73	28.58	9.24	8.74
T5/14	1	2014	3	3	cream	16564.9	3458.97	275.382	1304.39	41.8893	28.8168	9.06489	7.82443
T5/14	2	2014	3	3	cream	16826	3506.16	279.251	1332.68	40.1183	30.1626	8.87137	7.88566
T5/14	3	2014	3	3	cream	16034.9	3434.8	291.032	1314.59	35.2884	31.5075	8.62821	7.85264
A5/60	1	2013	1	3	cream	34170	3695.65	139.229	983.498	23.3202	45.7905	10.4	5.43478
A5/60	2	2013	1	3	cream	46575.9	3071.98	179.961	861.187	20.2179	43.9689	11.965	7.10117
A5/60	3	2013	1	3	cream	39858.4	3129.42	164.004	1046.51	23.2558	49.2417	11.4257	6.87563
A5/60	1	2014	1	3	cream	15520.9	2613.44	381.207	824.245	25.1801	27.3535	7.01071	6.62123
A5/60	2	2014	1	3	cream	10896.5	2726.1	392.67	786.33	25.6563	18.524	5.64636	6.73601
A5/60	3	2014	1	3	cream	13402.5	2407.9	248.988	822.716	26.469	20.568	6.17	7.296
A5/60	1	2013	2	3	cream	40719.4	3851.77	359.068	1177.71	23.8095	25.9068	11.11	5.67376
A5/60	2	2013	2	3	cream	47632.5	4015.09	248.814	1272.08	24.0333	27.7638	12.418	6.46138
A5/60	3	2013	2	3	cream	42933.6	4138.96	240.556	1398.56	25.5121	30.8646	10.4992	6.64642
A5/60	1	2014	2	3	cream	14153.7	2783.07	196.109	1176.07	42.3152	29.5331	9.21	8.56031
A5/60	2	2014	2	3	cream	11753.5	3002.34	225.418	1060.68	37.8404	20.7358	8.69565	8.49785
A5/60	3	2014	2	3	cream	12651.7	2989.63	221.82	1270.06	35.7339	23.5812	7.63209	9.00196
A5/60	1	2013	3	3	cream	20813.6	3557.38	226.634	1309.93	23.5351	25.0847	7.26392	7.16707
A5/60	2	2013	3	3	cream	22313.9	3255.53	210.664	1277.67	15.3924	21.328	7.84708	6.74044
A5/60	3	2013	3	3	cream	25874.1	3325.74	201.3	1458.02	18.57	28.54	8.27	7.029
A5/60	1	2014	3	3	cream	17501.2	3417.92	313.317	1398.55	32.8329	35.8354	10.63	9.49153
A5/60	2	2014	3	3	cream	17310.9	3201.88	427.286	1424.62	32.2294	39.2486	8.09	9.39199
A5/60	3	2014	3	3	cream	13880.5	3089.75	348.276	1262.7	30.1977	30.8839	9.14	9.18796
A5/98	1	2013	1	3	cream	37557	3012.77	387.836	1450.58	20.8819	33.2489	8.00811	6.21085
A5/98	2	2013	1	3	cream	39500	2899.7	485.5	1437	29.8	34.3	7.2	5.5
A5/98	3	2013	1	3	cream	33405.1	3108.11	460.441	1377.77	26.8252	31.8478	8.51277	6.00901
A5/98	1	2014	1	3	cream	19387.9	3101.28	321.432	1028.94	32.359	10.7896	3.13879	7.57185
A5/98	2	2014	1	3	cream	12750.2	2943.05	352.478	1292.52	29.38	23.207	5.53936	9.13508
A5/98	3	2014	1	3	cream	19298.8	3303.7	339.309	1196.54	36.284	16.79	4.506	8.556
A5/98	1	2013	2	3	cream	41045.2	3392.19	407.509	1062.4	16.4384	28.6149	8.11771	5.47945
A5/98	2	2013	2	3	cream	39896	3147.69	485.699	1274.05	13.5777	18.8248	7.80031	6.96828
A5/98	3	2013	2	3	cream	39995	3064.59	408.538	1222.5	13.3601	20.5826	6.42893	7.13209
A5/98	1	2014	2	3	cream	17203.5	2770.88	499.904	1752.17	50.7907	31.6972	7.75024	10.2218
A5/98	2	2014	2	3	cream	14260.9	2894.69	474.493	1525.6	51.7391	34.3961	9.08213	9.75845
A5/98	3	2014	2	3	cream	13891.3	3004.11	464.366	1695.15	52.5698	35.1444	8.61478	8.51689
A5/98	1	2013	3	3	cream	20118.5	3184.2	253.2	1486.42	21.7284	30.0247	5.4321	8.09877
A5/98	2	2013	3	3	cream	22547.3	3314.08	258.32	1325.36	24.87	28.54	6.55	8.55
A5/98	3	2013	3	3	cream	25487	3487.14	302.25	1398.74	28.01	32.65	5.89	7.99
A5/98	1	2014	3	3	cream	18784.6	3790.96	462.907	1789.01	36.5581	30.9188	10.598	10.5007
A5/98	2	2014	3	3	cream	18681.2	3711.45	486.168	1746.16	45.5131	31.2345	9.81656	10.114
A5/98	3	2014	3	3	cream	20058.5	3575.82	498.391	1767.92	48.8542	30.8142	8.58118	9.75134
A6/76	1	2013	1	3	cream	43747.5	1915.07	234.929	888.595	12.3218	25.5601	5.80448	4.58248
A6/76	2	2013	1	3	cream	33659	2010.18	250.865	965.7	13.8931	28.5496	8.54962	5.59796
A6/76	3	2013	1	3	cream	38246.8	2467.19	329.775	869.442	14.9853	23.2125	6.56219	5.19099
A6/76	1	2014	1	3	cream	8774.01	2584.87	311.833	785.839	16.6828	12.7061	4.8128	5.04365
A6/76	2	2014	1	3	cream	10086.5	3094.23	290.865	975.962	19.4423	15.0577	5.67308	4.80769
A6/76	3	2014	1	3	cream	7843.49	2870.81	323.956	669.419	21.315	9.121	7.489	4.801
A6/76	1	2013	2	3	cream	44481.1	4051.41	243.356	1127.06	11.3482	18.0407	8.9852	5.43162
A6/76	2	2013	2	3	cream	43726.2	3918.83	216.724	1294.87	8.01956	18.4841	9.19315	7.23716
A6/76	3	2013	2	3	cream	40582.2	3874.27	236.33	1024.39	13.54	20.35	7.25	6.25
A6/76	1	2014	2	3	cream	16705.8	3431.09	262.561	1254.94	38.7097	20.5279	11.828	9.77517
A6/76	2	2014	2	3	cream	11793.6	3725.55	300.289	1123.43	30.8582	20.2507	9.58	7.13597
A6/76	3	2014	2	3	cream	21355.9	4085.23	329.492	1197.09	33.1695	25.3511	10.1124	8.523
A6/76	1	2013	3	3	cream	22567.8	2872.65	402.923	1390.4	30.2067	22.0251	6.15866	5.9499
A6/76	2	2013	3	3	cream	17086.9	2976.12	345.081	1278.89	38.1089	23.6867	6.1127	5.73066
A6/76	3	2013	3	3	cream	20258.1	3214.74	358.33	1125.39	36.14	26.32	7.254	6.08
A6/76	1	2014	3	3	cream	19404.8	3102.18	313.69	1473.21	31.9444	39.9841	8.03571	8.33333
A6/76	2	2014	3	3	cream	18249.5	3228.24	301.934	1537.72	27.176	42.2631	8.51064	8.41393
A6/76	3	2014	3	3	cream	18842.3	3198.26	328.799	1469.37	29.4766	35.1182	9.13025	8.68307
A7/12	1	2013	1	3	cream	43302.6	3855.69	119.077	826.872	17.0256	28.1795	5.33333	6.30769
A7/12	2	2013	1	3	cream	49255.1	4004.08	114.796	907.959	14.2857	33.1633	6.53061	6.22449
A7/12	3	2013	1	3	cream	40173.5	3683.67	152.755	926.122	18.0612	38.0612	7.2449	6.12245
A7/12	1	2014	1	3	cream	11679.5	2278.31	234.933	744.722	14.587	33.628	11.036	4.319
A7/12	2	2014	1	3	cream	14141.6	2060.14	179.631	840.252	8.82638	35.7759	9.16392	4.46169
A7/12	3	2014	1	3	cream	15321.6	2644.12	149.976	966.174	12.0691	40.0191	10.767	5.09909
A7/12	1	2013	2	3	cream	37260.1	3555.89	140.257	1093.08	13.8912	40.1583	8.82493	6.83581
A7/12	2	2013	2	3	cream	34840.4	3404.74	161.895	1295.57	15.345	42.9454	9.78373	8.85685
A7/12	3	2013	2	3	cream	43272.4	3914.53	168.431	1180.94	17.334	43.0991	9.43215	7.21848
A7/12	1	2014	2	3	cream	11755.1	2196.08	260.067	721.76	26.3381	19.5122	6.50407	5.35629
A7/12	2	2014	2	3	cream	13313.6	2339.73	201.871	813.885	34.4658	18.3161	7.18858	6.20384
A7/12	3	2014	2	3	cream	19026.8	2621.9	266.618	966.18	30.0292	21.8978	8.02433	6.05109
A7/12	1	2013	3	3	cream	19073.3	3223.01	280.652	1231.16	22.5051	24.9593	9.16497	5.73931
A7/12	2	2013	3	3	cream	21073.3	3057.98	342.405	1054.14	26.7034	33.9243	7.25827	5.55822
A7/12	3	2013	3	3	cream	17876.5	2740.74	386.173	1283.95	28	29.2346	6.51852	5.4321
A7/12	1	2014	3	3	cream	24145.2	2574.21	298.36	1025.32	25.65	28.56	8.55	6.02
A7/12	2	2014	3	3	cream	28742.2	2654.25	263.22	987.36	28.99	24.98	7.25	5.98
A7/12	3	2014	3	3	cream	22587	2958.71	315.22	1174.34	30.02	30.02	8.64	6.55
A10/15	1	2013	1	3	cream	49631.8	4982.82	427.295	1472.75	14.9239	45.2626	7.95287	5.79283
A10/15	2	2013	1	3	cream	44630.7	4490.02	420.359	1338.72	14.3713	38.523	6.68663	5.48902
A10/15	3	2013	1	3	cream	45895.9	4081.48	348.348	1514.51	15.9159	40.8438	9.60961	6.50651
A10/15	1	2014	1	3	cream	19574.9	3378.74	310.338	1065.7	28.357	23.575	12.754	9.179
A10/15	2	2014	1	3	cream	15259.9	2975.68	302.337	1103.48	27.659	15.928	11.448	9.919
A10/15	3	2014	1	3	cream	11246.3	3041.54	267.755	978.734	22.552	11.474	10.584	8.023
A10/15	1	2013	2	3	cream	35501.5	3442.9	288.878	1403.48	17.7756	28.7289	10.3277	6.85204
A10/15	2	2013	2	3	cream	38115.9	3670.81	338.509	1326.09	19.6605	19.0476	9.14286	6.00414
A10/15	3	2013	2	3	cream	38793.2	3586.9	294.482	1272.82	21.7638	23.0191	12.1712	6.18876
A10/15	1	2014	2	3	cream	13336.6	2953.47	367.327	1136.63	32.2772	24.1584	12.0792	8.51485
A10/15	2	2014	2	3	cream	20736.1	3087	319.885	1515.3	39.5029	23.805	10.8031	9.84704
A10/15	3	2014	2	3	cream	18574.2	3345.27	387.25	1325.78	36.22	20.58	11.24	7.587
A10/15	1	2013	3	3	cream	23072.4	3153.62	264.188	1359.3	16.6341	24.364	7.4364	7.31703
A10/15	2	2013	3	3	cream	26551.2	3587.33	374.814	1533.89	19.8911	25.7298	5.64077	5.34389
A10/15	3	2013	3	3	cream	25874.2	3347.25	300.25	1478.95	15.34	28.56	6.68	6.587
A10/15	1	2014	3	3	cream	15489.5	3070.63	370.628	1322.94	49.9756	29.9216	10.1315	9.15733
A10/15	2	2014	3	3	cream	16492.8	3206.76	383.72	1475.36	55.5556	25.0242	10.0483	9.56522
A10/15	3	2014	3	3	cream	17913.5	3415.38	341.154	1550	49.1346	27.5	11.0577	10.3846
T11/10	1	2013	1	3	cream	24211.6	2583.93	456.053	1030.93	24.0081	42.8993	8.95219	4.88301
T11/10	2	2013	1	3	cream	22668	2280.43	410.711	833.885	17.8189	31.6456	8.47128	4.47907
T11/10	3	2013	1	3	cream	20821.4	2848.05	479.158	981.93	17.8645	37.8234	8.11088	4.00411
T11/10	1	2014	1	3	cream	11427.2	3015.97	389.647	1224.96	12.6754	20.2903	6.96662	6.57958
T11/10	2	2014	1	3	cream	13824.4	4070.24	277.463	1121.85	20.0976	23.5122	6.53659	7.29268
T11/10	3	2014	1	3	cream	14764.7	3413.73	406.765	1204.9	15.098	30.2941	6.56863	8.13725
T11/10	1	2013	2	3	cream	45260.5	5073.54	387.947	1419.82	12.0531	17.8703	11.2462	8.88662
T11/10	2	2013	2	3	cream	46816.8	4334.97	345.152	1237.81	17.0519	20.5779	12.4486	6.70127
T11/10	3	2013	2	3	cream	41164.8	4533.6	353.31	1383.77	21.4037	22.3544	10.3534	7.76506
T11/10	1	2014	2	3	cream	11672.4	3700.05	461.766	1218.55	40.814	25.3577	8.00543	6.51209
T11/10	2	2014	2	3	cream	16989.9	3782.92	312.108	1122.77	39.2668	27.5929	9.38447	7.26194
T11/10	3	2014	2	3	cream	20301.1	4717.82	430.209	1345.31	40.8936	27.4891	10.4046	6.99369
T11/10	1	2013	3	3	cream	18560.3	3320.56	380.735	1386.85	22.9933	20.6111	4.14293	5.69653
T11/10	2	2013	3	3	cream	18528.5	3341.4	355.787	1431.48	18.3801	29.1525	5.23002	5.81114
T11/10	3	2013	3	3	cream	18996.5	3450.57	346.597	1528.07	24.1431	24.2077	6.35867	5.74963
T11/10	1	2014	3	3	cream	15608.3	3201.78	247.478	1244.31	38.18	31.2562	8.11078	8.40752
T11/10	2	2014	3	3	cream	14622.6	3085.35	257.03	1249.14	35.1258	27.8244	8.09077	8.18944
T11/10	3	2014	3	3	cream	16709.5	3165.02	315.119	1248.02	39.5257	29.8419	8.3004	8.49802
SLANEY	1	2013	1	3	cream	20274.3	2810.47	419.052	1138.15	16.4339	34.7132	8.87282	6.18454
SLANEY	2	2013	1	3	cream	19153.3	2660.34	351.873	1035.52	17.129	23.455	6.90998	4.28224
SLANEY	3	2013	1	3	cream	17542.8	2487.41	395.468	912.487	15.71	29.9396	5.74018	5.82679
SLANEY	1	2014	1	3	cream	8378.48	2282.42	207.012	773.391	15.168	11.335	9.183	7.973
SLANEY	2	2014	1	3	cream	6426.64	2988.42	214.286	624.035	19.556	8.39768	10.027	5.53668
SLANEY	3	2014	1	3	cream	10803.7	2485.94	214.998	806.068	10.9521	7.4001	8.05871	6.61075
SLANEY	1	2013	2	3	cream	23200	3526.75	350.234	1576.1	21.2987	20.2078	8.93506	7.79221
SLANEY	2	2013	2	3	cream	28361.8	3694.06	310.853	1369.51	15.1938	15.7106	8.88889	6.61499
SLANEY	3	2013	2	3	cream	26582.8	3520.38	303.674	1473.63	18.6301	12.5818	6.24056	5.33468
SLANEY	1	2014	2	3	cream	13401.4	3693.88	317.396	1169.1	44.4121	36.346	8.16327	8.51118
SLANEY	2	2014	2	3	cream	10611.5	3476.17	258.739	1362.54	50.7222	32.9321	8.57005	7.12566
SLANEY	3	2014	2	3	cream	13972.2	3296.6	326.497	1205.56	59.2238	38.2367	9.39147	9.19981
SLANEY	1	2013	3	3	cream	29621.9	2459.89	261.676	690.24	15.6362	35.115	4.14921	4.39448
SLANEY	2	2013	3	3	cream	25321.9	2705.23	200.505	555.634	16.8008	30.3823	4.82897	4.72837
SLANEY	3	2013	3	3	cream	29841.3	2453.37	191.865	763.294	14.5833	31.6468	5.35714	5.15873
SLANEY	1	2014	3	3	cream	15367	2763.58	314.013	1206.86	33.7464	38.1316	6.86368	6.67302
SLANEY	2	2014	3	3	cream	14829.9	2619.05	311.662	1172.01	30.5151	30.0292	6.8999	6.70554
SLANEY	3	2014	3	3	cream	15844.4	2803.55	377.745	1252.58	25.8986	36.7307	6.79468	7.18858
A2/11	1	2013	1	2	dark yellow	29508.4	4303.09	426.001	1031.93	26.1176	30.2732	7.60264	5.98074
A2/11	2	2013	1	2	dark yellow	25149.9	4447.78	543.33	915.408	25.7497	28.4385	6.72182	5.82627
A2/11	3	2013	1	2	dark yellow	27814.6	4080.18	365.869	1097.3	25.675	29.6485	8.27152	5.09424
A2/11	1	2014	1	2	dark yellow	17594.3	2881.15	378.329	1415.75	28.282	20.334	10.024	9.737
A2/11	2	2014	1	2	dark yellow	12811.6	2997.1	269.179	1315.36	26.377	20.918	8.309	8.087
A2/11	3	2014	1	2	dark yellow	14193.2	2365.05	455.321	1235.9	25.1986	21.3732	9.55027	8.04316
A2/11	1	2013	2	2	dark yellow	41938	2986.72	320.118	1228.73	11.9036	28.1358	6.67437	6.80423
A2/11	2	2013	2	2	dark yellow	31290.6	3373.4	378.424	1451.23	16.9458	31.4286	7.29064	6.99507
A2/11	3	2013	2	2	dark yellow	40121.4	3596.36	331.816	1158.32	10.3187	25.8827	5.2605	6.27213
A2/11	1	2014	2	2	dark yellow	19577.1	3698.03	308.65	1550.22	42.864	26.6218	7.66795	7.40029
A2/11	2	2014	2	2	dark yellow	15755.2	3271.47	275.222	1485.69	33.2932	26.6831	8.98322	8.8845
A2/11	3	2014	2	2	dark yellow	13191.9	3454.86	364.578	1333	37.7898	21.1149	6.51209	8.78145
A2/11	1	2013	3	2	dark yellow	31361.9	3902.72	210.895	1438.72	20.8171	25.5837	5.15564	5.54475
A2/11	2	2013	3	2	dark yellow	24958	3320.38	281.408	1431.72	21.5336	24.895	4.83193	6.30252
A2/11	3	2013	3	2	dark yellow	27854.2	3527.36	328.44	1587.08	22.6	27.38	6.27	6.09
A2/11	1	2014	3	2	dark yellow	30074.5	5133.63	430.999	2223.55	65.2757	50.1416	7.14	10.929
A2/11	2	2014	3	2	dark yellow	28674.8	5244.99	512.225	2052.81	55.3545	54.0709	8.55	10.0733
A2/11	3	2014	3	2	dark yellow	29910.4	4859.56	613.845	2182.27	47.51	57.6096	7.98	10.3625
A2/73	1	2013	1	2	dark yellow	41059.6	3962.3	224.86	1072.85	17.728	28.9165	7.53948	6.92817
A2/73	2	2013	1	2	dark yellow	46554.4	3618.17	417.509	1284.33	23.2772	31.756	8.98418	6.02348
A2/73	3	2013	1	2	dark yellow	43587.2	3369.47	302.32	1187.25	21.57	33.58	7.99	7.09
A2/73	1	2014	1	2	dark yellow	12790.4	2482.89	279.904	993.157	7.80723	28.54	4.06024	6.72289
A2/73	2	2014	1	2	dark yellow	14159	2999.52	220.434	1055.42	12.1446	26.97	3.60241	8.86747
A2/73	3	2014	1	2	dark yellow	19874.2	2789.21	302.11	895.25	10.58	30.77	3.25	7.98
A2/73	1	2013	2	2	dark yellow	29851.1	3474.58	450.021	1017.57	11.813	25.3724	7.29327	6.88238
A2/73	2	2013	2	2	dark yellow	33462.9	3552.57	549.975	1253.61	11.0613	24.2152	7.87245	6.67663
A2/73	3	2013	2	2	dark yellow	34741.7	3661.16	510.434	940.083	14.2025	22.1901	7.98347	7.02479
A2/73	1	2014	2	2	dark yellow	17902.4	3031.8	471.194	1286.61	36.7327	24.0329	9.18318	7.15321
A2/73	2	2014	2	2	dark yellow	13451.2	2829.83	518.834	1210.33	32.3136	22.0612	9.27342	7.36138
A2/73	3	2014	2	2	dark yellow	15561.1	2973.57	571.771	1109.63	28.2294	18.8529	8.08229	7.48628
A2/73	1	2013	3	2	dark yellow	19688.6	3843.8	505.274	1139.13	17.6796	23.7248	5.12305	7.72577
A2/73	2	2013	3	2	dark yellow	22217.8	3667.83	491.298	1337.64	15.4152	23.2939	7.35952	6.16609
A2/73	3	2013	3	2	dark yellow	23719.5	3676.83	594.207	1405.49	20.9675	21.6463	6.45122	7.8252
A2/73	1	2014	3	2	dark yellow	19885.1	3732.89	545.524	1267.59	44.0402	37.8171	8.32934	6.51029
A2/73	2	2014	3	2	dark yellow	19731.5	3689.71	538.439	1242.17	54.4008	34.4107	7.95624	6.66335
A2/73	3	2014	3	2	dark yellow	20118	3705.01	505.801	1240.9	41.8879	35.3982	8.16126	6.588
A3/15	1	2013	1	2	dark yellow	31185.4	3502.87	744.151	1086.16	19.9478	28.5692	11.906	5.01305
A3/15	2	2013	1	2	dark yellow	25189.1	3514.06	702.813	849.37	16.5858	29.2483	10.9602	5.43162
A3/15	3	2013	1	2	dark yellow	27238.7	4000.99	796.055	1090.73	26.0355	25.6686	11.5385	5.45168
A3/15	1	2014	1	2	dark yellow	18516	3555.77	634.849	988.99	45.476	19.531	12.361	9.861
A3/15	2	2014	1	2	dark yellow	16119.8	3821.22	640.373	895.383	38.703	19.941	11.851	7.76
A3/15	3	2014	1	2	dark yellow	13652.5	3546.67	632.551	691.336	34.414	20.755	10.861	8.032
A3/15	1	2013	2	2	dark yellow	39387.4	2547.43	492.688	1131.42	26.8775	31.4229	7.917	7.41107
A3/15	2	2013	2	2	dark yellow	39970.6	2497.3	414.223	1452.67	16.2825	28.4453	9.31829	6.27759
A3/15	3	2013	2	2	dark yellow	37773.7	4460.82	381.733	1184.22	22.2107	20.5501	8.92579	7.78412
A3/15	1	2014	2	2	dark yellow	16052.2	2760.52	337.01	1122.4	45.4765	24.0929	10.4499	7.35365
A3/15	2	2014	2	2	dark yellow	13961.7	2968.09	377.811	1065.29	41.9539	31.9097	9.40403	7.46195
A3/15	3	2014	2	2	dark yellow	15856	2570.04	339.981	1021.4	47.7626	24.5136	8.36576	7.7821
A3/15	1	2013	3	2	dark yellow	20785.9	2640.12	316.753	1176.84	17.1644	21.5098	5.48087	6.10134
A3/15	2	2013	3	2	dark yellow	14841.2	2553	309.819	988.764	11.0405	17.489	5.56913	4.20127
A3/15	3	2013	3	2	dark yellow	16834.3	2566.07	380.079	1114.4	13.7081	18.7377	6.01578	5.91716
A3/15	1	2014	3	2	dark yellow	21372.8	4513.58	493.235	1667.16	33.5802	44.7901	9.67901	11.1605
A3/15	2	2014	3	2	dark yellow	21440.5	4464.48	389.907	1686.43	32.3371	42.4302	9.70113	10.975
A3/15	3	2014	3	2	dark yellow	20356.5	4341.04	460.116	1622.35	39.5954	46.262	9.44123	10.501
A3/74	1	2013	1	2	dark yellow	21461.4	2742.97	401.533	946.96	18.7021	24.0164	7.86919	4.59888
A3/74	2	2013	1	2	dark yellow	21199	2680.1	435.971	773.464	13.5627	16.7076	6.31	3.85012
A3/74	3	2013	1	2	dark yellow	24422.3	2334.66	565.239	1005.98	20.4183	23.1076	7.37052	3.98406
A3/74	1	2014	1	2	dark yellow	9213.83	1769.88	291.309	723.358	14.716	8.099	6.85	5.642
A3/74	2	2014	1	2	dark yellow	11797.9	1614.19	289.504	629.057	20.838	9.135	7.872	6.608
A3/74	3	2014	1	2	dark yellow	10365.7	1964.39	316.073	992.3	15.7844	8.95091	5.00481	6.641
A3/74	1	2013	2	2	dark yellow	35423.2	1360.24	363.287	1097.44	9.74409	12.7953	4.82283	4.13386
A3/74	2	2013	2	2	dark yellow	35208.9	1266.23	410.871	1024.66	12.8485	18.7217	5.73729	5.53598
A3/74	3	2013	2	2	dark yellow	32136.1	1007.5	334.767	1109.55	11.7059	18.1091	6.003	5.0025
A3/74	1	2014	2	2	dark yellow	16463.1	2775.77	403.517	1148.02	48.852	24.1329	7.23009	7.3278
A3/74	2	2014	2	2	dark yellow	15699.1	2917.07	422.951	1135	54.0984	33.269	8.49	7.32883
A3/74	3	2014	2	2	dark yellow	13582.8	2587.22	425.9	1208.27	52.47	28.64	9.14	7.92
A3/74	1	2013	3	2	dark yellow	17248	3028.19	221.596	1437.46	18.9202	23.0291	8.12231	6.30674
A3/74	2	2013	3	2	dark yellow	27243.7	3818.65	190.933	1684.7	23.0757	21.4982	8.86141	8.24317
A3/74	3	2013	3	2	dark yellow	21289.4	3449.28	195.352	1470.26	16.2919	19.4903	9.49	6.9965
A3/74	1	2014	3	2	dark yellow	16749	2522.73	438.142	1149.21	42.4308	21.917	8.3004	7.6087
A3/74	2	2014	3	2	dark yellow	15382.4	2571.7	450.574	1165.39	41.9694	22.6577	7.55258	7.64818
A3/74	3	2014	3	2	dark yellow	15203.1	2569.75	425.746	1153.21	43.3676	22.5159	8.51689	7.83162
A3/108	1	2013	1	2	dark yellow	16258.5	3254.74	385.21	985.25	28.33	21.54	7.58	5.69
A3/108	2	2013	1	2	dark yellow	18574.1	3485.21	324.87	841.28	30.64	19.87	8.98	7.25
A3/108	3	2013	1	2	dark yellow	20148.3	3658.2	303.67	999.88	31.55	17.85	8.05	6.67
A3/108	1	2014	1	2	dark yellow	9042.45	3973.35	445.015	673.445	33.57	12.142	8.687	5.232
A3/108	2	2014	1	2	dark yellow	12569.2	3507.91	421.146	891.798	37.549	19.071	9.091	6.621
A3/108	3	2014	1	2	dark yellow	15852.3	3857.96	408.24	741.28	30.66	17.64	10.22	6.87
A3/108	1	2013	2	2	dark yellow	46553.7	5396.25	474.725	1021.98	24.5506	27.3241	11.7103	5.64972
A3/108	2	2013	2	2	dark yellow	45525	4910.7	453.189	1242.39	21.6879	39.6467	10.95	6.96762
A3/108	3	2013	2	2	dark yellow	47371.1	5088.66	379.381	1116.49	17.5258	33.4021	11.3402	6.59794
A3/108	1	2014	2	2	dark yellow	15056.1	4353	375.719	1177.96	50.902	33.1546	11.214	8.28864
A3/108	2	2014	2	2	dark yellow	11763.5	3761.58	415.074	982.562	52.3153	32.4138	9.55665	8.07882
A3/108	3	2014	2	2	dark yellow	17543.8	4058.37	409.25	1057.24	78.57	30.87	10.74	8.67
A3/108	1	2013	3	2	dark yellow	18082.7	3276.19	382.341	1007.67	17.9617	29.5661	6.05449	6.1554
A3/108	2	2013	3	2	dark yellow	24034.4	3476.24	277.351	1235.59	20.3236	23.9636	8.39232	8.2912
A3/108	3	2013	3	2	dark yellow	23214.5	3025.87	325.14	1147.28	23.11	26.15	7.98	7.57
A3/108	1	2014	3	2	dark yellow	21195.5	4043.12	578.246	1335.62	70.2597	41.5512	7.23	8.62322
A3/108	2	2014	3	2	dark yellow	21435.6	3944.55	483.267	1259.41	60.5941	44.7525	9.548	8.0198
A3/108	3	2014	3	2	dark yellow	21284	4005.93	381.63	1304.69	51.6543	77.7284	8.1485	8.09877
A3/110	1	2013	1	2	dark yellow	20486.8	4154.99	261.898	1127.67	22.3547	20.7352	10.3328	7.65027
A3/110	2	2013	1	2	dark yellow	29035.9	3863.59	281.333	1001.03	17.5385	30.3077	9.87	7.38462
A3/110	3	2013	1	2	dark yellow	24225.8	4369.63	273.327	1199.8	23.3766	27.5724	11.2887	8.59041
A3/110	1	2014	1	2	dark yellow	11421.5	2333.45	227.152	620.462	19.872	12.199	5.903	6.099
A3/110	2	2014	1	2	dark yellow	13493.7	2918.19	272.666	842.83	18.4697	6.25602	4.61983	7.31473
A3/110	3	2014	1	2	dark yellow	15874.3	2587.24	300.14	758.92	15.55	18.24	6.54	6.84
A3/110	1	2013	2	2	dark yellow	43356.1	2476.1	277.268	1250.24	9.17073	16.878	9.7561	8
A3/110	2	2013	2	2	dark yellow	38742.5	2335.01	204.326	1370.22	11.4688	21.0865	8.14889	8.04829
A3/110	3	2013	2	2	dark yellow	31208.4	2848.83	152.163	1433.12	11.5365	23.9682	7.65788	8.24366
A3/110	1	2014	2	2	dark yellow	14953.9	3199.42	257.933	1158.13	39.6943	36.5842	7.86026	7.33721
A3/110	2	2014	2	2	dark yellow	8475.82	2919.73	271.47	1253.38	43.9072	36.3636	8.2205	8.60735
A3/110	3	2014	2	2	dark yellow	15232.4	3189.91	246.489	1307.62	41.7409	32.5519	9.18	9.39664
A3/110	1	2013	3	2	dark yellow	22242.4	3118.32	412.023	1583.97	19.8092	17.6527	6.48855	6.87023
A3/110	2	2013	3	2	dark yellow	18506.7	2764.01	398.855	1382.68	15.6297	19.0144	7.05	6.57043
A3/110	3	2013	3	2	dark yellow	24036.4	3003.54	375.569	1400.1	21.8513	19.0187	5.86748	6.67678
A3/110	1	2014	3	2	dark yellow	16477.3	4042.96	406.253	1581.86	42.864	36.8496	12.42	9.06921
A3/110	2	2014	3	2	dark yellow	16054.4	3833.82	434.5	1568.51	46.9388	35.277	10.9815	8.35763
A3/110	3	2014	3	2	dark yellow	16434.6	3865.68	490.667	1572.35	52.642	38.1975	11.4568	8.79012
A3/142	1	2013	1	2	dark yellow	21458.1	3025.67	325.14	985.27	25.22	20.58	5.54	7.25
A3/142	2	2013	1	2	dark yellow	25369.1	3254.09	287.21	1088.25	23.88	23.57	6.21	6.11
A3/142	3	2013	1	2	dark yellow	19785.2	3147.52	367.14	905.27	27.9	19.68	5.55	6.87
A3/142	1	2014	1	2	dark yellow	8799.81	2971.95	403.385	840.716	30.2824	12.6692	4.0619	6.09284
A3/142	2	2014	1	2	dark yellow	9345.11	2895.93	448.012	885.223	29.161	12.96	6.382	6.873
A3/142	3	2014	1	2	dark yellow	13228.5	2745.95	482.752	1035.87	28.403	14.545	5.678	7.337
A3/142	1	2013	2	2	dark yellow	24906.6	3646.27	278.838	1082.99	15.7054	25.9129	4.97925	6.12033
A3/142	2	2013	2	2	dark yellow	31191.3	3395.95	237.123	962.234	17.909	27.5828	6.92042	7.11814
A3/142	3	2013	2	2	dark yellow	27470.5	3411.52	273.732	995.866	18.5433	31.7323	5.68898	7.54724
A3/142	1	2014	2	2	dark yellow	15104.6	3170.8	277.664	1105.6	28.7105	30.2433	8.46715	7.49392
A3/142	2	2014	2	2	dark yellow	9940.65	3248.27	227.201	1163.2	24.8961	33.5312	8.20969	7.51731
A3/142	3	2014	2	2	dark yellow	10721.2	2952.44	224.366	1082.55	24.4639	25.731	7.75049	6.14035
A3/142	1	2013	3	2	dark yellow	22071.7	3142.43	287.052	1472.91	20.1195	25.4582	9.56175	6.3745
A3/142	2	2013	3	2	dark yellow	21007.2	3068.86	271.634	1434.74	24.0493	20.1439	8.22199	7.60534
A3/142	3	2013	3	2	dark yellow	22103.2	3238.86	231.547	1574.36	30.5458	20.1302	7.22584	8.21382
A3/142	1	2014	3	2	dark yellow	15722.5	2777.99	321.818	1209.57	40.0957	23.445	8.32536	8.22967
A3/142	2	2014	3	2	dark yellow	14959.1	2702.26	377.104	1109.19	41.5584	22.5108	8.85041	7.98461
A3/142	3	2014	3	2	dark yellow	15350	2770.85	395.11	1196.55	48.2263	23.3941	8.34132	8.4372
A3/206	1	2013	1	1	dark yellow	37245.9	3752.85	280.894	850.305	14.0244	31.9106	7.31707	6.19919
A3/206	2	2013	1	1	dark yellow	31434.3	3954	209.361	814.696	16.004	38.2134	6.44187	6.54253
A3/206	3	2013	1	2	dark yellow	39090.5	3645.67	285.922	958.829	14.867	34.7363	7.74069	6.48283
A3/206	1	2014	1	2	dark yellow	11387.4	2647.14	323.476	1089.77	24.1959	25.3481	5.4892	5.85694
A3/206	2	2014	1	2	dark yellow	11706.6	3051.77	295.11	1143.24	25.024	18.8878	4.60211	6.16299
A3/206	3	2014	1	2	dark yellow	8537.04	2765.11	352.632	1043.86	26.5107	23.2768	4.53411	6.72515
A3/206	1	2013	2	2	dark yellow	35489.8	3195.92	190.918	1302.04	15.7551	17.3469	6.12245	7.55102
A3/206	2	2013	2	2	dark yellow	31043.6	3134.55	239.615	1180.34	11.7528	18.9463	5.47112	6.4843
A3/206	3	2013	2	2	dark yellow	39056.3	3411.17	205.729	1170.92	17.429	22.9321	7.34039	7.9923
A3/206	1	2014	2	2	dark yellow	14368.7	3515.67	283.696	1207.55	35.6072	18.2879	8.7731	7.74069
A3/206	2	2014	2	2	dark yellow	18801.8	3736.97	330.151	1395.03	33.2197	23.6094	9.83926	8.96249
A3/206	3	2014	2	2	dark yellow	20587.3	3347.24	308.47	1358.02	30.22	21.54	7.25	7.08
A3/206	1	2013	3	2	dark yellow	21056.9	3464.43	209.553	1265.24	14.4309	20.3252	6.80894	6.40244
A3/206	2	2013	3	2	dark yellow	17917.1	2997.49	266.152	1233.37	11.4754	17.9826	6.07522	5.40019
A3/206	3	2013	3	2	dark yellow	23911.8	3016.12	221.896	1295.49	11.5256	19.9696	5.98074	6.69032
A3/206	1	2014	3	2	dark yellow	26587.4	2785.34	354.21	1102.36	18.56	21.87	7.25	5.36
A3/206	2	2014	3	2	dark yellow	28573.9	2589.36	391.1	1254.02	20.81	23.65	8.21	6.85
A3/206	3	2014	3	2	dark yellow	30258.1	3027.44	308.66	1198.74	16.77	25.66	7.98	6
A3/223	1	2013	1	2	dark yellow	22301	1836.02	438.738	1038.83	15.7282	22.0388	7.16	6.8932
A3/223	2	2013	1	2	dark yellow	18463.1	1557.63	414.434	879.751	14.0187	17.2378	5.81516	4.36137
A3/223	3	2013	1	2	dark yellow	24587.4	2147.28	408.24	954.27	10.5	20.88	6.25	5.96
A3/223	1	2014	1	2	dark yellow	6902.81	2975.33	209.275	773.952	11.0508	8.09077	4.78	4.44006
A3/223	2	2014	1	2	dark yellow	8179.28	2558.07	207.807	754.024	10.4096	10.4096	3.08434	5.01205
A3/223	3	2014	1	2	dark yellow	11276.7	2690.51	220.517	766.22	14.9031	12.7819	2.88127	6.75609
A3/223	1	2013	2	2	dark yellow	30198.9	4788.78	212.851	1024.89	13.9898	23.6614	4.99745	4.87557
A3/223	2	2013	2	2	dark yellow	23665.8	4399	220.998	1057.36	13.8653	22.3192	6.68	5.18703
A3/223	3	2013	2	2	dark yellow	26836.2	4993.9	291.455	1147.2	13.3266	20.6816	7.85	6.10376
A3/223	1	2014	2	2	dark yellow	14815.2	3770.52	372.252	1092.65	48.879	24.772	7.68123	6.04897
A3/223	2	2014	2	2	dark yellow	12466.5	3388.59	354.144	958.412	45.6576	22.928	9.32	7.3598
A3/223	3	2014	2	2	dark yellow	11978.6	3861.6	376.413	1153.02	52.8265	19.5906	8.96686	8.8694
A3/223	1	2013	3	2	dark yellow	25035.8	3901.74	135.619	1066.33	19.0379	23.7462	7.67656	7.51894
A3/223	2	2013	3	2	dark yellow	20010.3	3088.84	158.471	911.674	12.9132	14.0496	5.47521	5.06198
A3/223	3	2013	3	2	dark yellow	22587.4	3547.29	188.99	1125.32	15.09	17.98	6.55	6.25
A3/223	1	2014	3	2	dark yellow	16212.3	3767.28	318.793	1339.82	26.1538	24.4693	9.78	7.88705
A3/223	2	2014	3	2	dark yellow	13735.6	3390.42	316.954	1188.7	23.2759	25.4981	8.9	5.65134
A3/223	3	2014	3	2	dark yellow	15994.2	3551.28	392.778	1331.73	21.9547	23.2065	7.9923	7.60713
A3/346	1	2013	1	2	dark yellow	26692.9	3926.29	273.415	834.3	14.3735	25.258	9.72973	3.83292
A3/346	2	2013	1	2	dark yellow	21943.3	3346.15	266.802	917.206	13.7652	24.1903	8.80567	4.37652
A3/346	3	2013	1	2	dark yellow	24510.4	3569.79	226.979	839.375	13.75	29.5833	7.5	5
A3/346	1	2014	1	2	dark yellow	8393.88	2508.6	229.159	641.109	19.0535	11.8547	4.68	4.49331
A3/346	2	2014	1	2	dark yellow	11178.2	3197.03	154.554	712.871	15.4455	12.2871	6.0396	4.55446
A3/346	3	2014	1	2	dark yellow	9714.01	2997.61	237.482	548.853	23.816	13.763	5.857	5.466
A3/346	1	2013	2	2	dark yellow	41490.2	3248.37	230.306	1014.65	12.6443	16.9594	6.62318	7.3151
A3/346	2	2013	2	2	dark yellow	47658.3	3139.91	232.793	1353.95	9.81836	21.6004	8.43	8.34561
A3/346	3	2013	2	2	dark yellow	41773	2803.21	280.468	1236.24	15.0999	17.925	7.13	7.01413
A3/346	1	2014	2	2	dark yellow	12848.7	2893.52	195.776	1029.47	46.5226	24.9312	8.05501	7.07269
A3/346	2	2014	2	2	dark yellow	12460.6	3058.86	229.921	1116.14	49.9016	25.5906	9.84252	7.67717
A3/346	3	2014	2	2	dark yellow	10302.7	2687.5	185.742	1110.35	43.457	25.5859	9.375	7.57031
A3/346	1	2013	3	2	dark yellow	20273.2	2759.51	272.39	1327.8	14.439	19.7561	6.73171	7.21951
A3/346	2	2013	3	2	dark yellow	19726.9	2934.75	305.26	1415.28	18.7699	17.6024	7.78958	7.48609
A3/346	3	2013	3	2	dark yellow	26149.9	3085.21	312.361	1279.64	20.3647	22.0871	8.10537	6.78825
A3/346	1	2014	3	2	dark yellow	26637.7	5751.09	494.404	1525.33	42.6773	38.9773	10.9986	8.00772
A3/346	2	2014	3	2	dark yellow	25938.3	5626.65	477.609	1496.33	45.1739	39.9804	11.367	7.83929
A3/346	3	2014	3	2	dark yellow	25831.7	5533.46	406.405	1501.91	43.3078	36.1377	10.4207	7.74379
A3/351	1	2013	1	2	dark yellow	36618.6	3174.23	204.948	1275.26	23.8144	40.5155	9.38144	8.65979
A3/351	2	2013	1	2	dark yellow	22338.7	2968.07	357.496	1217.86	19.0199	31.5381	9.21883	7.9573
A3/351	3	2013	1	2	dark yellow	29492.7	2636.1	329.756	1189.27	19.9024	37.6098	7.60976	7.07317
A3/351	1	2014	1	2	dark yellow	13284.8	3022.8	445.9	1131.49	34.546	25.711	9.52	9.316
A3/351	2	2014	1	2	dark yellow	12224.4	2736.91	333.174	1220.52	31.927	19.929	10.56	8.026
A3/351	3	2014	1	2	dark yellow	13353.1	2965.48	342.899	1096.84	28.008	21.314	11.7	7.002
A3/351	1	2013	2	2	dark yellow	44132.1	4889.98	257.997	1071.05	16.2559	20.2412	10.68	7.01206
A3/351	2	2013	2	2	dark yellow	47090.3	4547.66	201.815	1078.16	19.5663	23.4997	11.3969	8.57287
A3/351	3	2013	2	2	dark yellow	43721.9	4356.85	191.431	1197.34	20.3476	26.2781	9.06	6.95297
A3/351	1	2014	2	2	dark yellow	11856.9	3088.01	373.791	1305.61	36.3636	33.6557	7.93037	8.80077
A3/351	2	2014	2	2	dark yellow	13187.8	3225.62	359.534	1232.41	30.8491	36.7783	7.76322	6.30762
A3/351	3	2014	2	2	dark yellow	14660.8	2970.5	395.477	1478.86	32.4484	30.2557	9.24287	7.0295
A3/351	1	2013	3	2	dark yellow	26507.1	3803.46	384.318	1484.73	19.2464	25.7637	5.49898	7.12831
A3/351	2	2013	3	2	dark yellow	21604.2	3717.71	315.312	1644.79	16.6667	20.9375	6.97917	8.125
A3/351	3	2013	3	2	dark yellow	23471.1	3818.18	306.818	1571.49	17.0455	16.0124	7.36	6.09504
A3/351	1	2014	3	2	dark yellow	18212.5	3857.99	470.407	1556.11	42.1053	33.1678	10.6256	9.23535
A3/351	2	2014	3	2	dark yellow	19047.2	3673.28	439.096	1567.78	33.2613	34.2829	11.002	9.23379
A3/351	3	2014	3	2	dark yellow	14707.9	3420.27	345.606	1629.26	37.5896	38.0118	10.8002	8.89102
A3/368	1	2013	1	2	dark yellow	22645.3	1788.08	310.421	1078.16	19.9399	28.1563	8.81764	6.51303
A3/368	2	2013	1	2	dark yellow	27019.3	2092.17	316.175	972.737	15.2594	24.0081	7.01933	5.96745
A3/368	3	2013	1	2	dark yellow	20709.2	1852.58	350.355	1155.02	21.4083	25.0861	8.51064	7.7001
A3/368	1	2014	1	2	dark yellow	10039.7	3149.8	275.694	699.802	22.7976	9.02778	8.08	6.86905
A3/368	2	2014	1	2	dark yellow	12391.1	2965.54	330.3	753.533	25.169	12.294	7.81	6.97
A3/368	3	2014	1	2	dark yellow	9841.27	2845.12	206.83	547.475	24.242	10.005	9.235	6.157
A3/368	1	2013	2	2	dark yellow	38567.7	3326.41	355.631	1394.91	35.7032	20.7213	8.40685	7.13337
A3/368	2	2013	2	2	dark yellow	38583.9	3871.73	389.738	1115.44	26.3725	13.648	8.0041	6.05439
A3/368	3	2013	2	2	dark yellow	36196.6	4029.74	303.981	1292.81	30.8921	14.8681	7.52	5.3717
A3/368	1	2014	2	2	dark yellow	10946.9	2619.32	222.222	918.647	46.4734	19.0338	7.82609	7.24638
A3/368	2	2014	2	2	dark yellow	10954.7	2520.73	191.225	1058.15	36.3259	16.297	8.00386	6.55738
A3/368	3	2014	2	2	dark yellow	8470.19	2121.15	218.942	840.192	34.0385	16.4423	7.11538	6.76923
A3/368	1	2013	3	2	dark yellow	21437.4	3236.14	233.47	1361.4	16.7351	19.7125	7.90554	6.87885
A3/368	2	2013	3	2	dark yellow	19862.1	3677.99	349.188	1245.25	18.4589	23.5352	6.99163	5.82521
A3/368	3	2013	3	2	dark yellow	18888.9	2932.91	264.885	1498.95	16.9811	21.2788	6.49895	6.91824
A3/368	1	2014	3	2	dark yellow	21797.5	4132.35	351.704	1320.49	38.0247	39.8025	9.54	6.91358
A3/368	2	2014	3	2	dark yellow	21546.7	4143.97	403.988	1276.26	39.7082	32.8794	10.7004	6.71206
A3/368	3	2014	3	2	dark yellow	22229.7	4418.07	410.572	1343.58	34.5747	43.1523	10.66	7.78472
A9/4	1	2013	1	2	dark yellow	17332.7	1954.39	310.957	920.079	15.5677	33.3421	8.72583	7.53594
A9/4	2	2013	1	2	dark yellow	21407.4	2080.42	375.012	962.183	17.8076	28.7219	6.89325	6.0742
A9/4	3	2013	1	2	dark yellow	16768	1456.83	328.22	1124.94	14.9542	35.302	6.84998	7.04293
A9/4	1	2014	1	2	dark yellow	15051	3319.4	337.19	902.577	28.099	24.404	9.431	6.417
A9/4	2	2014	1	2	dark yellow	10510.9	2808.27	268.759	686.423	24.6715	22.7251	10.2652	4.28224
A9/4	3	2014	1	2	dark yellow	13587	3024.78	287.33	874.24	20.85	28.25	8.69	5.89
A9/4	1	2013	2	2	dark yellow	35056.5	1983.31	210.113	1054.49	16.2838	27.5601	5.59647	5.5783
A9/4	2	2013	2	2	dark yellow	38818.9	2169.35	291.801	1139.09	14.695	25.9639	5.85652	4.39239
A9/4	3	2013	2	2	dark yellow	34953.4	1561.66	189.741	925.596	14.8187	24.3523	7.15026	4.45596
A9/4	1	2014	2	2	dark yellow	12519.8	2115.61	337.846	1119.57	58.3004	30.6087	6.71937	7.70751
A9/4	2	2014	2	2	dark yellow	7364.25	1971.01	277.198	847.15	60	21.9372	5.7971	5.99034
A9/4	3	2014	2	2	dark yellow	10258.2	2247.21	304.22	993.21	52.11	25.58	7.25	6.86
A9/4	1	2013	3	2	dark yellow	23966.3	3497.27	336.143	1507.73	17.65	16.7828	6.941	4.75954
A9/4	2	2013	3	2	dark yellow	26473.3	3241.22	360.509	1662.09	23.0025	20.2545	5.69975	6.26209
A9/4	3	2013	3	2	dark yellow	22587.2	3025.74	312.55	1458.37	21.64	24.36	7.57	5.25
A9/4	1	2014	3	2	dark yellow	26359.7	5795.44	441.251	1589.92	64.6631	42.9472	11.2816	8.8221
A9/4	2	2014	3	2	dark yellow	27480.5	5758.79	409.766	1648.44	61.2305	50.1953	12.3789	9.96094
A9/4	3	2014	3	2	dark yellow	27184.4	5558.84	382.373	1614.1	59.0758	54.3116	10.8623	8.38495
A9/8	1	2013	1	2	dark yellow	27485.1	3100	209.307	809.703	14.9505	24.5545	6.93069	5.74257
A9/8	2	2013	1	2	dark yellow	24305.6	3884.92	205.06	1065.48	19.8413	25.8929	8.03571	6.04365
A9/8	3	2013	1	2	dark yellow	28825.6	3633.42	215.528	905.651	16.3145	29.1155	7.17445	5.89681
A9/8	1	2014	1	2	dark yellow	10423.5	3436	248.027	1055.82	28.9605	13.8595	6.25602	8.95091
A9/8	2	2014	1	2	dark yellow	15832.1	3112.07	303.147	781.211	32.713	22.89	7.535	8.298
A9/8	3	2014	1	2	dark yellow	13587.1	3658.27	295.33	987.24	25.87	18.57	8.25	8.247
A9/8	1	2013	2	2	dark yellow	26497.3	2329.26	448.07	1114.8	10.8451	27.4548	8.10943	7.13239
A9/8	2	2013	2	2	dark yellow	30207.3	3006.91	271.668	1274.43	16.5844	23.0997	10.2665	7.40375
A9/8	3	2013	2	2	dark yellow	32930.7	2432.67	349.703	1126.73	13	27.4257	9.64356	6.94059
A9/8	1	2014	2	2	dark yellow	13059.6	3203.32	235.875	1070.38	37.5367	20.25	9.18866	8.79765
A9/8	2	2014	2	2	dark yellow	10986.2	2834.32	371.893	1049.31	33.3826	17.7515	8.08679	7.98817
A9/8	3	2014	2	2	dark yellow	9055.94	2926.4	307.262	993.621	34.917	11.519	7.337	6.809
A9/8	1	2013	3	2	dark yellow	23095.7	3077.39	306.762	1328.92	13.9511	27.1079	7.63747	7.31365
A9/8	2	2013	3	2	dark yellow	19152.2	3194.61	336.609	1348.75	19.9422	28.131	5.68401	8.47784
A9/8	3	2013	3	2	dark yellow	20967.6	3077.31	287.182	1382.54	16.6584	26.8329	7.38155	6.78304
A9/8	1	2014	3	2	dark yellow	29759.6	4488.46	324.038	1892.31	38.8462	45.9615	10.5962	10.2308
A9/8	2	2014	3	2	dark yellow	29300.5	5818.72	427.783	1772.41	39.803	41.6749	12.3399	9.9064
A9/8	3	2014	3	2	dark yellow	29108.6	3334.15	334.632	1865.56	33.5509	44.7151	11.0175	11.8334
T9/13	1	2013	1	2	dark yellow	32649	3186.96	301.864	1163.53	18.2374	40.2598	9.06775	7.84513
T9/13	2	2013	1	2	dark yellow	32100	3567	220.3	1282	16.5	43.4	8.6	8.9
T9/13	3	2013	1	2	dark yellow	33160.6	3389.23	213.618	1111.79	20.0203	37.3984	7.72358	7.91057
T9/13	1	2014	1	2	dark yellow	10191.8	2475.16	265.125	771.274	28.6572	18.3773	8.26267	5.80423
T9/13	2	2014	1	2	dark yellow	13493.2	2640.9	278.376	836.986	22.211	22.016	10.078	7.078
T9/13	3	2014	1	2	dark yellow	10954	2802.35	217.025	734.149	24.07	12.622	9.556	6.654
T9/13	1	2013	2	2	dark yellow	29845.6	3288.73	339.887	1034.48	13.8085	19.176	6.07308	7.20535
T9/13	2	2013	2	2	dark yellow	24904.4	2863.66	350.956	1104.71	15.2035	15.8901	6.86611	7.35655
T9/13	3	2013	2	2	dark yellow	28132.2	3151.23	406.891	1250.88	9.41412	16.2243	6.40961	6.10916
T9/13	1	2014	2	2	dark yellow	12951.5	2743.02	287.078	1503.67	42.5991	24.9633	9.49584	9.35585
T9/13	2	2014	2	2	dark yellow	12658.7	2918.65	336.21	1408.73	58.9286	28.373	8.73016	9.92063
T9/13	3	2014	2	2	dark yellow	10664.4	2602.11	309.291	1294.34	46.4046	33.8447	9.10834	8.91659
T9/13	1	2013	3	2	dark yellow	19039.8	3526.07	276.2	1340.22	20.6505	22.7001	7.84719	6.5049
T9/13	2	2013	3	2	dark yellow	27514.5	3863.95	261.745	1407.67	21.4241	30.4782	9.98424	5.98424
T9/13	3	2013	3	2	dark yellow	21015.9	3432.47	314.044	1260.96	23.9442	21.1155	8.88048	5.47809
T9/13	1	2014	3	2	dark yellow	15885.8	3341.72	372.507	1317.52	48.6544	29.332	9.87415	7.93804
T9/13	2	2014	3	2	dark yellow	15904.7	3524.32	429.475	1341.44	41.4397	35.3113	9.53307	8.36576
T9/13	3	2014	3	2	dark yellow	16110.8	3324.26	335.537	1354.4	49.4895	27.3213	9.82013	8.55615
T10/8	1	2013	1	2	dark yellow	22610.4	3467.12	330.422	732.287	10.7949	22.8656	7.06575	5.59372
T10/8	2	2013	1	2	dark yellow	22778.1	3447.41	333.971	969.2	14.2929	30.2969	6.64318	5.63664
T10/8	3	2013	1	2	dark yellow	23692.5	398.222	431.276	895.188	10.1464	24.1632	5.91632	5.64854
T10/8	1	2014	1	2	dark yellow	10559.6	2189.78	248.37	550.073	18.589	13.431	9.309	3.796
T10/8	2	2014	1	2	dark yellow	13642.8	2632.69	351.968	684.46	19.546	18.163	7.77	5.064
T10/8	3	2014	1	2	dark yellow	11056	2540.15	380.876	656.156	10.1144	21.1679	8.49148	4.57421
T10/8	1	2013	2	2	dark yellow	29503.4	2881.01	245.629	1043.97	16.7253	15.4165	9.31195	7.44956
T10/8	2	2013	2	2	dark yellow	27445.9	2408.24	307.209	1280.12	13.5942	21.6272	6.48816	7.00309
T10/8	3	2013	2	2	dark yellow	22210.1	2671.36	300.396	1039.64	12.884	16.2438	8.36967	6.25273
T10/8	1	2014	2	2	dark yellow	10744.8	3251.8	296.973	1237.87	39.5002	33.4455	9.13023	5.69101
T10/8	2	2014	2	2	dark yellow	9061.46	2675.12	275.512	1205.85	30.9268	36.6829	6.43902	7.41463
T10/8	3	2014	2	2	dark yellow	11707.3	2580.58	266.858	1173.6	36.1119	30.3993	7.07795	6.31277
T10/8	1	2013	3	2	dark yellow	17163.9	3395.49	304.711	1468.11	15.5054	28.8518	5.10304	8.83219
T10/8	2	2013	3	2	dark yellow	19784.8	3858.19	353.496	1223.47	17.8973	18.1907	8.11736	6.74817
T10/8	3	2013	3	2	dark yellow	20147.3	3528.14	315.77	1324.32	19.34	23.58	6.98	7.2789
T10/8	1	2014	3	2	dark yellow	15497.3	3242.95	470.213	1273.63	47.3924	29.9852	8.21376	6.53142
T10/8	2	2014	3	2	dark yellow	15382.3	3188.95	471.929	1239.27	59.6941	28.3177	7.59743	6.51209
T10/8	3	2014	3	2	dark yellow	14726.6	3143.55	478.516	1191.41	39.9414	26.9531	7.61719	5.95703
AGRIA	1	2013	1	2	dark yellow	25904	3063.2	341.793	832.435	17.5404	26.4576	7.15336	5.4096
AGRIA	2	2013	1	2	dark yellow	23965.3	3613.2	273.904	928.44	18.8583	32.7217	9.98981	6.82977
AGRIA	3	2013	1	2	dark yellow	32423.8	3421.19	295.36	711.628	14.2636	33.385	8.27132	5.99483
AGRIA	1	2014	1	2	dark yellow	12939.5	3359.32	447.651	1478.21	28.184	18.692	8.814	6.683
AGRIA	2	2014	1	2	dark yellow	15555.6	3370.21	470.451	1617.66	24.061	23.581	9.704	8.54
AGRIA	3	2014	1	2	dark yellow	11237.9	3521.28	448.356	1510.64	28.1431	20.5029	8.41393	7.05996
AGRIA	1	2013	2	2	dark yellow	28194.2	3317.15	235.508	1261.66	19.2059	24.2792	8.19423	5.56399
AGRIA	2	2013	2	2	dark yellow	26782.4	3244.99	227.677	873.447	18.2885	33.3496	6.94377	4.20538
AGRIA	3	2013	2	2	dark yellow	23005.9	3285.85	278.487	1017.68	24.9116	22.6916	5.51866	4.22397
AGRIA	1	2014	2	2	dark yellow	14866.8	3211.62	337.53	1390.8	48.2082	29.54	7.36077	6.00484
AGRIA	2	2014	2	2	dark yellow	18910.9	3006.93	379.406	1506.93	41.8812	22.9109	9.90099	7.52475
AGRIA	3	2014	2	2	dark yellow	16747.9	3473.89	252.611	1449.38	41.4719	26.9518	8.92889	7.34858
AGRIA	1	2013	3	2	dark yellow	23589.3	3205.87	257.25	1145.02	23.64	23.58	7.32	5.87
AGRIA	2	2013	3	2	dark yellow	26059	3454.22	308.25	1287.32	25.08	25.95	8.47	6.47
AGRIA	3	2013	3	2	dark yellow	29875.3	3658.54	337.22	1008.21	28.33	28.55	9.01	6.74
AGRIA	1	2014	3	2	dark yellow	19298.6	4135.41	302.094	1577.2	36.1422	29.5178	8.76766	6.81929
AGRIA	2	2014	3	2	dark yellow	21344.5	4380.62	323.628	1658.92	35.9713	25.0124	9.0954	7.61246
AGRIA	3	2014	3	2	dark yellow	20241.1	3995.18	325.362	1525.55	36.837	30.7618	8.10029	6.26808
GRANOLA	1	2013	1	2	dark yellow	20793	2487.42	409.643	1081.74	12.4327	23.7885	7.44004	3.32844
GRANOLA	2	2013	1	2	dark yellow	23493.5	2172.3	463.049	1173.13	20.155	29.354	7.95866	4.03101
GRANOLA	3	2013	1	2	dark yellow	25874.2	2058.69	389.33	985.21	18.54	26.87	7.021	5.412
GRANOLA	1	2014	1	2	dark yellow	16319.1	4138.4	426.718	1181.16	35.7617	23.3614	8.95867	6.247
GRANOLA	2	2014	1	2	dark yellow	16097.6	3641.32	403.778	1195.6	33.094	18.651	9.66	7.461
GRANOLA	3	2014	1	2	dark yellow	11692	3337.91	437.273	987.739	30.448	21.677	10.201	6.572
GRANOLA	1	2013	2	2	dark yellow	36753.2	3952.05	466.533	1685.31	20.4795	34.8751	7.79221	4.4955
GRANOLA	2	2013	2	2	dark yellow	35820.2	4347.83	366.502	1540.51	23.5494	32.9051	9.78261	5.42292
GRANOLA	3	2013	2	2	dark yellow	33106.6	4437.56	400.609	1703.55	25.3299	39.8985	9.94924	4.56853
GRANOLA	1	2014	2	2	dark yellow	9794.72	3619.75	363.636	1170.09	33.1408	34.1447	9.38416	6.25611
GRANOLA	2	2014	2	2	dark yellow	10354.5	3253.04	261	1177.27	39.0529	31.4716	9.13065	5.53667
GRANOLA	3	2014	2	2	dark yellow	9378.94	3069.87	370.791	1257.64	41.2785	38.3309	8.73362	5.72538
GRANOLA	1	2013	3	2	dark yellow	22188.6	3706.1	362.585	1688.38	24.5909	30.3283	6.4617	6.4617
GRANOLA	2	2013	3	2	dark yellow	17783.5	3719.59	353.196	1739.18	20.9278	26.9072	4.84536	7.1134
GRANOLA	3	2013	3	2	dark yellow	22876.3	3754.55	412.848	2044.1	28.7344	33.2685	7.28667	6.04027
GRANOLA	1	2014	3	2	dark yellow	17144.3	3407.26	411.482	1155.05	40.1374	42.3386	9.02846	5.10304
GRANOLA	2	2014	3	2	dark yellow	17100.4	3550.72	489.758	1104.4	45.3241	35.7249	10.6878	5.24493
GRANOLA	3	2014	3	2	dark yellow	18071.7	3562.02	431.395	1176.36	43.3295	38.6628	10.8527	6.10465
A1/9	1	2013	1	1	light yellow	26624.6	2238.6	329.583	951.018	24.1513	31.8138	9.9903	5.81959
A1/9	2	2013	1	1	light yellow	23240.5	2193.42	335.494	1006.58	20.0506	33.3165	8.50633	4.86076
A1/9	3	2013	1	1	light yellow	22614.6	2402.08	374.063	1105.21	21.25	29.5833	8.95833	5.3125
A1/9	1	2014	1	1	light yellow	19692.3	3879.4	563.474	1109.68	37.419	22.615	11.995	9.529
A1/9	2	2014	1	1	light yellow	17744.9	3741.04	568.323	1353.08	34.687	20.06	11.467	10.225
A1/9	3	2014	1	1	light yellow	11198.7	3530.09	513.754	1242.98	33.7249	21.9102	11.1461	9.62369
A1/9	1	2013	2	1	light yellow	50448	5003.53	409.819	1166.83	18.3985	33.6416	10.2507	6.19638
A1/9	2	2013	2	1	light yellow	45801.8	4876.4	450.868	1224.72	16.4454	30.7457	9.88662	6.53728
A1/9	3	2013	2	1	light yellow	50267	5082.37	569.924	1185.89	17.2292	33.6272	11.1839	7.45592
A1/9	1	2014	2	1	light yellow	12970.6	3238.24	220.588	1357.84	33.5294	30.4118	10.098	9.5098
A1/9	2	2014	2	1	light yellow	15271.8	3694.26	288.678	1507.23	40.0998	35.0125	10.3741	10.5736
A1/9	3	2014	2	1	light yellow	14748.9	3324.71	260.865	1419.19	40.2785	28.9682	10.6415	9.9453
A1/9	1	2013	3	1	light yellow	18430.2	3277.27	225.688	1590.72	26.8196	25.1203	6.21814	7.9317
A1/9	2	2013	3	1	light yellow	22252.1	3553.61	266.567	1716.99	28.2013	24.7135	6.17838	9.06826
A1/9	3	2013	3	1	light yellow	21524.2	3907	358.908	1732.23	24.7168	28.999	8.34192	8.65088
A1/9	1	2014	3	1	light yellow	16252.3	3569.22	312.55	1587.55	32.25	28.52	8.24	9.55
A1/9	2	2014	3	1	light yellow	18256.7	3853.02	280.24	1458.53	30.22	25.77	9.15	10.21
A1/9	3	2014	3	1	light yellow	19325.2	4125.74	358.52	1358.52	33.67	23.99	9.55	9.99
T1/26	1	2013	1	1	light yellow	27470.6	3680.12	398.927	1283.6	21.4614	38.2218	9.50434	5.72305
T1/26	2	2013	1	1	light yellow	22186.2	3692.6	403.532	995.704	23.4845	32.4582	9.06921	6.39618
T1/26	3	2013	1	1	light yellow	26547.2	3548.47	457.66	1085.36	25.65	36.87	8.98	6.05
T1/26	1	2014	1	1	light yellow	13461.4	3253.96	377.436	1092.65	30.725	23.131	9.217	9.313
T1/26	2	2014	1	1	light yellow	11792.6	3812.98	418.605	1080.43	25.2907	18.7984	7.84884	8.75194
T1/26	3	2014	1	1	light yellow	13293.5	3924.38	425.871	1298.51	34.0299	20.0647	6.16915	9.65174
T1/26	1	2013	2	1	light yellow	34172.3	3033.52	402.476	1105.72	16.1939	25.6833	5.26044	5.56988
T1/26	2	2013	2	1	light yellow	34734.3	2716.73	388.583	1050.2	15.1575	19.7835	6.88976	5.11811
T1/26	3	2013	2	1	light yellow	42330	2561	369	928.4	14.6	24.4	5	4.1
T1/26	1	2014	2	1	light yellow	11498.6	3166.19	246.974	1098.94	34.8703	23.3429	9.70221	8.74159
T1/26	2	2014	2	1	light yellow	11656.3	3325.97	226.596	1290.45	36.4858	24.7955	9.40951	9.94575
T1/26	3	2014	2	1	light yellow	12763	2978.37	248.476	1297.94	34.3756	25.3186	9.63618	8.75123
T1/26	1	2013	3	1	light yellow	23472.2	3139.88	270.238	1563.49	28.8492	32.2024	6.44841	7.8373
T1/26	2	2013	3	1	light yellow	33494.1	3585.94	232.889	1404.82	33.6583	36.6906	6.73063	8.72242
T1/26	3	2013	3	1	light yellow	20698.4	3756.07	252.935	1640.69	24.6964	37.3482	6.47773	8.19838
T1/26	1	2014	3	1	light yellow	17258	3683.54	426.339	1158.72	40.1966	31.6708	8.45209	7.97789
T1/26	2	2014	3	1	light yellow	17282	3434	447.881	1369.7	37.2913	35.4603	8.28057	8.4754
T1/26	3	2014	3	1	light yellow	17232.1	3230.18	500.769	1277.27	43.729	32.6766	8.36136	8.16915
A2/127	1	2013	1	1	light yellow	50107.8	2758.82	402.941	1249.02	23.1373	37.9412	7.2549	5.98039
A2/127	2	2013	1	1	light yellow	44563.3	3272.03	332.875	1218.84	15.7017	39.4642	5.59372	5.59372
A2/127	3	2013	1	1	light yellow	47766	2898.64	456.682	1145.07	20.1715	35.2143	7.46344	5.34544
A2/127	1	2014	1	1	light yellow	14175.2	2704.85	573.568	962.898	19.5203	31.816	7.53793	6.36319
A2/127	2	2014	1	1	light yellow	18115.7	3345.36	479.163	1044.87	25.224	26.62	6.26	6.68
A2/127	3	2014	1	1	light yellow	11939.6	3089.67	385.38	1038.01	18.5185	28.6706	5.26316	5.75049
A2/127	1	2013	2	1	light yellow	40151.6	3372.41	542.496	1533.1	14.2496	26.6801	7.19656	7.17534
A2/127	2	2013	2	1	light yellow	32213.4	2923.23	431.007	1220.54	8.77368	23.0309	6.08175	5.68295
A2/127	3	2013	2	1	light yellow	29985	3167.58	434.417	1270.64	10.1036	20.5088	5.0025	6.003
A2/127	1	2014	2	1	light yellow	14738.4	2860.81	296.644	1194.47	33.8598	24.4817	7.60118	7.20632
A2/127	2	2014	2	1	light yellow	11939.6	3089.67	385.38	1038.01	28.5185	18.6706	5.26316	5.75049
A2/127	3	2014	2	1	light yellow	17085.7	3256.37	348.55	1025.87	26.57	20.58	6.89	6.28
A2/127	1	2013	3	1	light yellow	21360.7	3761.63	239.941	1660.06	14.5864	22.2222	6.42633	8.58003
A2/127	2	2013	3	1	light yellow	21234.6	3948.64	254.716	1864.69	20.9383	29.4321	5.23457	9.28395
A2/127	3	2013	3	1	light yellow	28632.1	3703.63	211.71	1500.52	17.2021	23.4197	7.87565	8.0829
A2/127	1	2014	3	1	light yellow	17635.8	3562.44	432.793	1066.73	48.5129	30.2736	8.19828	6.95901
A2/127	2	2014	3	1	light yellow	14936.5	3062.56	566.276	1049.85	44.4282	32.8065	9.57967	6.84262
A2/127	3	2014	3	1	light yellow	14150.9	3000.49	426.521	1037.47	50.3163	30.1703	10.0243	6.90998
A2/99	1	2013	1	1	light yellow	29428.6	3834.48	610.049	1011.82	31.5271	41.5468	9.75369	4.64532
A2/99	2	2013	1	1	light yellow	29001.5	3211.47	495.75	999.795	26.6257	36.5591	10.5719	5.63236
A2/99	3	2013	1	1	light yellow	31258	3587.27	536.99	1085.27	29.97	38.54	9.14	4.98
A2/99	1	2014	1	1	light yellow	11596	3292.04	378.371	836.494	17.5322	19.0076	5.05002	4.76417
A2/99	2	2014	1	1	light yellow	10112.8	3545.86	386.366	748.504	11.7705	17.694	7.55272	3.53114
A2/99	3	2014	1	1	light yellow	11755.1	3108	431.63	986.5	18.476	20.905	6.09	5.497
A2/99	1	2013	2	1	light yellow	36258.5	3484.99	412.767	1645.65	12.2981	38.9786	7.14904	6.14904
A2/99	2	2013	2	1	light yellow	48357.5	3747.08	420.519	1310.03	12.0669	32.5512	9.68547	7.68847
A2/99	3	2013	2	1	light yellow	35569.7	3899.34	355.34	1255.85	8.07358	30.2054	8.48237	6.54062
A2/99	1	2014	2	1	light yellow	14840.3	3829.98	364.324	1413.27	53.3661	27.6167	10.7125	9.82801
A2/99	2	2014	2	1	light yellow	16630.3	3703.67	404.856	1449.95	51.4371	25.9663	11.3974	8.82061
A2/99	3	2014	2	1	light yellow	17403.1	4276.16	388.469	1267.44	54.0698	23.3527	11.2403	8.04264
A2/99	1	2013	3	1	light yellow	18518.2	2951.24	282.772	956.023	24.4742	22.5621	6.13384	5.25813
A2/99	2	2013	3	1	light yellow	14154.9	2645.79	228.349	983.926	20.8334	29.74	5.26059	5.16318
A2/99	3	2013	3	1	light yellow	22008.2	3322.75	302.254	1082.17	19.2623	26.9467	5.22541	5.84016
A2/99	1	2014	3	1	light yellow	11810.2	2462.82	392.172	1113.5	21.5851	31.9961	7.82779	6.84932
A2/99	2	2014	3	1	light yellow	11212.3	2448.29	288.867	1112.32	23.7506	25.5319	7.12519	6.63038
A2/99	3	2014	3	1	light yellow	12297.4	2592.81	408.249	1138.61	28.1055	28.0096	8.78417	7.76978
A3/26	1	2013	1	1	light yellow	45799.9	2126.46	262.468	1088.73	38.2834	44.581	8.63382	5.48502
A3/26	2	2013	1	1	light yellow	46581.8	2049.92	270.606	1128.88	35.1126	45.4407	8.0489	5.19613
A3/26	3	2013	1	1	light yellow	46581.8	2049.92	270.606	1128.88	33.1126	45.4407	8.0489	5.19613
A3/26	1	2014	1	1	light yellow	35642.2	2568.63	340.25	1258.36	36.25	38.55	9.21	6.98
A3/26	2	2014	1	1	light yellow	33258.1	2738.14	368.255	1322.55	39.22	40.25	9.99	6.05
A3/26	3	2014	1	1	light yellow	37852.4	2974.22	387.214	1299.54	40.88	42.88	8.83	5.99
A3/26	1	2013	2	1	light yellow	36158.2	3780.17	250.85	1019	21.058	28.8649	8.93683	6.98511
A3/26	2	2013	2	1	light yellow	42493.6	4176.24	196.73	1217.17	17.0669	21.257	9.36587	7.3582
A3/26	3	2013	2	1	light yellow	34601.3	3970.75	249.97	1161	19.2433	21.4779	7.82123	6.19604
A3/26	1	2014	2	1	light yellow	20510.3	4055.94	258.292	1324.83	45.5348	23.4544	10.052	9.81354
A3/26	2	2014	2	1	light yellow	16970.3	3574.23	272.577	1293.03	39.4603	18.2172	9.83926	7.89089
A3/26	3	2014	2	1	light yellow	16888.5	3702.54	286.888	1453.03	49.1194	21.3307	9.78474	8.61057
A3/26	1	2013	3	1	light yellow	22126.6	2563.8	246.39	1201.19	19.7824	20.6825	5.73689	6.45104
A3/26	2	2013	3	1	light yellow	17344.1	2881.29	233.622	1362.17	17.8068	20.4225	5.33199	6.74044
A3/26	3	2013	3	1	light yellow	20093.8	2969.79	240.625	1483.33	18.2292	25.9375	6.79167	7.91667
A3/26	1	2014	3	1	light yellow	17494	3807.45	363.135	1537.49	59.7968	40.9289	9.38558	9.48234
A3/26	2	2014	3	1	light yellow	18633.7	3909.88	428.876	1510.66	55.814	37.0155	9.98062	9.68992
A3/26	3	2014	3	1	light yellow	18565.8	3697.33	437.587	1469.83	56.3996	40.6528	9.79228	9.0999
A3/29	1	2013	1	1	light yellow	29136.2	3119.92	298.577	999.593	13.8943	21.4024	7.0122	3.45528
A3/29	2	2013	1	1	light yellow	22626.1	3487.77	308.937	723.814	15.3769	18.0729	8.38742	4.39341
A3/29	3	2013	1	1	light yellow	21864.8	2936.48	246.414	826.127	14.0369	17.5205	6.14754	3.07377
A3/29	1	2014	1	1	light yellow	13649.7	1971.62	296.869	700.587	25.342	9.589	5.871	5.773
A3/29	2	2014	1	1	light yellow	9770.44	2366.01	369.754	823.251	26.8966	8.867	4.72906	5.41872
A3/29	3	2014	1	1	light yellow	11908.8	2059.49	323.946	880.813	24.4621	10.289	4.67724	6.14774
A3/29	1	2013	2	1	light yellow	30067.8	1409.49	371.539	923.717	24.453	11.6805	4.74347	5.51791
A3/29	2	2013	2	1	light yellow	41191.4	1810.55	359.57	1216.8	18.2617	17.6758	4.78516	3.90625
A3/29	3	2013	2	1	light yellow	35896.3	2005.87	303.21	1158.36	22.54	14.25	5.01	4.89
A3/29	1	2014	2	1	light yellow	11068.1	2209.76	253.939	1011.12	36.1527	18.6564	6.24	5.89657
A3/29	2	2014	2	1	light yellow	15428.9	2508.18	398.314	1264.25	55.1314	26.58	7.53594	7.73426
A3/29	3	2014	2	1	light yellow	11358.4	2965.27	357.29	1128.32	49.55	23.54	5.98	6.38
A3/29	1	2013	3	1	light yellow	25366.6	3881.87	441.344	1142.16	21.1609	32.6884	10.0081	6.4053
A3/29	2	2013	3	1	light yellow	24321.4	3790.42	388.882	1296.41	23.6527	33.1677	9.18164	7.58483
A3/29	3	2013	3	1	light yellow	19248	3537.6	303.049	1019.31	21.4431	30.4878	11.5854	5.26829
A3/29	1	2014	3	1	light yellow	18748.2	3519.8	522.347	1240.1	39.6112	29.1443	8.01956	6.45477
A3/29	2	2014	3	1	light yellow	19883.4	3864.92	478.328	1294.46	37.8037	23.3431	9.71817	7.09427
A3/29	3	2014	3	1	light yellow	15336.2	3031.95	428.612	1033.86	47.3057	24.0749	7.86695	5.24559
A3/37	1	2013	1	1	light yellow	17225.5	2268.63	290	811.176	13.0392	26.7647	6.86275	4.80392
A3/37	2	2013	1	1	light yellow	22725.5	2907.83	407.235	954.708	13.4787	23.3895	7.53221	5.55005
A3/37	3	2013	1	1	light yellow	17660.5	2463.77	313.043	763.768	10.7039	30.0911	7.66046	4.86542
A3/37	1	2014	1	1	light yellow	8355.19	2220.2	271.326	736.237	38.382	11.4888	6.74438	6.12733
A3/37	2	2014	1	1	light yellow	11942.9	2073.09	336.547	660.797	39.449	15.804	7.477	6.296
A3/37	3	2014	1	1	light yellow	12190.6	2473.48	274.951	825.54	32.22	14.342	8.841	7.564
A3/37	1	2013	2	1	light yellow	31944.2	3290.66	445.332	1179.98	8.18094	28.1039	6.54475	5.00481
A3/37	2	2013	2	1	light yellow	22979.6	3842.13	374.49	1253.53	13.0319	24.7412	7.73654	6.48197
A3/37	3	2013	2	1	light yellow	33406.3	3657.24	475.236	1206.36	15.0174	32.2228	8.43	6.96171
A3/37	1	2014	2	1	light yellow	13224.6	2694.82	219.29	1157.39	33.7812	27.856	10.4607	8.06142
A3/37	2	2014	2	1	light yellow	13478.7	2945.74	363.081	1056.2	32.1318	30.0388	9.39922	7.55814
A3/37	3	2014	2	1	light yellow	13356.5	3153.2	473.575	1017.35	29.1522	35.7957	8.44	6.04859
A3/37	1	2013	3	1	light yellow	17319.2	3510.13	340.694	1361.72	20.0289	14.0791	6.55738	4.33944
A3/37	2	2013	3	1	light yellow	26947.2	3843	471.832	1413.03	20.8312	18.6762	8.82504	5.64597
A3/37	3	2013	3	1	light yellow	20509	3013.97	431.737	1335.33	26.1477	16.5469	6.28743	6.58683
A3/37	1	2014	3	1	light yellow	14714.6	2652.56	324.409	1363.19	40.9449	36.122	6.00394	6.98819
A3/37	2	2014	3	1	light yellow	15225.3	2788.11	373.154	1497.6	33.7488	42.5695	6.51965	7.5743
A3/37	3	2014	3	1	light yellow	18753.3	2985.74	306.78	1487.2	36.57	38.57	7.05	7.25
A3/164	1	2013	1	1	light yellow	37919	2104.56	238.134	815.684	18.8621	33.9313	7.79088	4.61302
A3/164	2	2013	1	1	light yellow	22464.8	1830.18	195.633	785.25	19.8933	26.2009	8.53954	6.69578
A3/164	3	2013	1	1	light yellow	23754.9	2304.9	279.314	755.098	13.6275	21.9608	6.96078	5.29412
A3/164	1	2014	1	1	light yellow	14085.9	2859.62	388.326	1042.93	35.408	13.796	9.156	9.648
A3/164	2	2014	1	1	light yellow	10951.2	2538.1	313.159	966.387	28.783	17.348	9.069	8.689
A3/164	3	2014	1	1	light yellow	13248.7	2954.57	321.055	976.649	25.012	18.368	10.747	9.575
A3/164	1	2013	2	1	light yellow	38305.4	1230.54	331.492	1226.52	21.6976	31.9437	8.53842	7.333
A3/164	2	2013	2	1	light yellow	40324.9	1070.05	383.046	1146.19	18.3299	29.5431	8.12183	6.29442
A3/164	3	2013	2	1	light yellow	40449.2	1422.41	327.667	1085.25	15.9265	23.3793	7.35069	7.96325
A3/164	1	2014	2	1	light yellow	12778	2738.85	217.148	1075.94	44.586	24.9878	8.03528	8.03528
A3/164	2	2014	2	1	light yellow	12688	3057.25	374.939	1097.79	34.398	32.5307	7.86241	7.07617
A3/164	3	2014	2	1	light yellow	14630.4	2816.15	253.016	932.004	39.4747	27.7043	7.97665	6.80934
A3/164	1	2013	3	1	light yellow	22170.8	3110.08	245.267	1431.07	24.5885	26.8724	5.7037	7.71605
A3/164	2	2013	3	1	light yellow	17865.9	3210.37	230.894	1346.54	27.8455	28.8618	6.19919	7.72358
A3/164	3	2013	3	1	light yellow	21908.6	3419.64	267.202	1649.42	27.7248	27.122	7.03164	8.0452
A3/164	1	2014	3	1	light yellow	14135	3017.25	431.05	1095.12	33.514	30.2612	9.65993	7.09709
A3/164	2	2014	3	1	light yellow	14545.5	3149.53	397.615	1125.68	36.2643	30.1043	9.23994	7.94834
A3/164	3	2014	3	1	light yellow	14687.8	3256.69	479.286	1151.64	35.9762	31.4172	9.71259	7.13578
A3/167	1	2013	1	1	light yellow	24140.4	2181.73	300.407	889.42	25.3306	31.1292	8.44354	4.37436
A3/167	2	2013	1	1	light yellow	36544.1	2306.3	216.826	785.491	33.5516	30	6.74307	4.63476
A3/167	3	2013	1	1	light yellow	41445.5	2049.56	209.809	890.862	23.2163	32.6278	7.64068	4.64636
A3/167	1	2014	1	1	light yellow	11369.7	2532.4	285.911	635.542	8.14924	9.5891	5.45459	3.14188
A3/167	2	2014	1	1	light yellow	11673.1	2423.08	321.538	585.481	11.6346	8.11538	4.44231	4.71154
A3/167	3	2014	1	1	light yellow	8399.24	2740.35	257.932	729.3	13.3888	10.9576	3.62077	5.71701
A3/167	1	2013	2	1	light yellow	32760.4	2890.62	372.396	1026.04	13.125	20.4167	6.97917	6.77083
A3/167	2	2013	2	1	light yellow	31483.5	3199.49	326.127	897.114	16.9873	14.1772	7.18987	5.46835
A3/167	3	2013	2	1	light yellow	43692.8	3578.53	355.096	943.476	13.2939	16.3466	6.20384	5.2191
A3/167	1	2014	2	1	light yellow	10280.2	2434.78	203.575	1094.2	38.8406	21.8357	8.4058	8.11594
A3/167	2	2014	2	1	light yellow	14177.1	2970.36	297.209	1154.96	40.5852	17.3244	8.75842	8.27719
A3/167	3	2014	2	1	light yellow	12733.4	2643.89	292.3	1153.99	42.0597	21.2705	9.23965	8.85467
A3/167	1	2013	3	1	light yellow	22569.1	2307.61	313.718	1105.19	19.1129	19.1953	7.36791	6.3015
A3/167	2	2013	3	1	light yellow	26294.1	2918.43	200.101	1200.4	17.4924	19.7382	8.12689	6.143
A3/167	3	2013	3	1	light yellow	18720.5	2737.28	233.456	1273.2	18.0388	22.2339	6.03408	6.60724
A3/167	1	2014	3	1	light yellow	12612.3	2897.78	385.778	1176.3	35.0617	27.9506	8.59259	6.81481
A3/167	2	2014	3	1	light yellow	12550.1	2833.81	368.386	1148.04	37.8892	30.1815	7.92741	6.39924
A3/167	3	2014	3	1	light yellow	13199.8	2800.19	378.445	1169.29	42.0601	34.3348	8.01144	6.6762
A3/177	1	2013	1	1	light yellow	15686.3	3083.16	488.286	724.585	11.3625	19.7084	5.02765	4.9271
A3/177	2	2013	1	1	light yellow	22551.1	3142.16	374.586	937.585	15.5794	23.8559	8.56865	6.52386
A3/177	3	2013	1	1	light yellow	17584.3	3257.2	435.74	857.21	13.29	21.08	7.51	5.27
A3/177	1	2014	1	1	light yellow	10207	2417.38	332.031	780.469	26.816	18.262	8.844	6.086
A3/177	2	2014	1	1	light yellow	9757.99	2116.17	367.861	880.058	21.297	12.682	9.487	7.26
A3/177	3	2014	1	1	light yellow	9187.19	2065.03	373.202	660.591	23.842	15.429	10.433	5.123
A3/177	1	2013	2	1	light yellow	47864.9	2748.05	405.506	1396.36	23.0649	18.1299	9.35065	7.2987
A3/177	2	2013	2	1	light yellow	41152	2929.94	341.463	1023.25	23.2486	13.4925	8.51064	6.85003
A3/177	3	2013	2	1	light yellow	42142.9	2355.19	437.182	1265.17	20.9589	15.0685	10.8611	8.12133
A3/177	1	2014	2	1	light yellow	11773.1	3668.26	513.251	1300.29	42.612	20.5891	9.34223	10.1516
A3/177	2	2014	2	1	light yellow	14489.5	3588.67	671.519	1441.13	44.4895	21.0581	10.19	11.0405
A3/177	3	2014	2	1	light yellow	16787.3	3874.07	559.445	1381.26	45.0174	23.8969	9.69212	11.0064
A3/177	1	2013	3	1	light yellow	21619.8	2692.35	428.741	1423.21	30.6173	19.9506	7.60494	7.30864
A3/177	2	2013	3	1	light yellow	22097.8	2253.66	377.105	1116.49	27.0298	16.4397	6.25315	5.95058
A3/177	3	2013	3	1	light yellow	25874.1	2785.14	408.47	1357.08	32.11	17.28	8.91	6.55
A3/177	1	2014	3	1	light yellow	21425.7	3996.01	357.527	1279.16	44.9751	39.669	10.2602	6.97906
A3/177	2	2014	3	1	light yellow	20853.3	4140.94	467.114	1307.77	44.813	36.1457	9.03931	7.09492
A3/177	3	2014	3	1	light yellow	20576.3	4180.82	508.942	1351.22	46.3686	34.0785	8.90959	7.35221
A3/189	1	2013	1	1	light yellow	21990.2	2200.88	390.882	983.333	13.9216	30.098	7.84314	4.5098
A3/189	2	2013	1	1	light yellow	23756.1	2866.34	396.293	932.293	17.1707	30.2439	8.58537	4.19512
A3/189	3	2013	1	1	light yellow	20228.7	2307.31	468.523	742.616	15.7136	28.4764	6.66335	4.77374
A3/189	1	2014	1	1	light yellow	13763.3	2637.25	210.378	848.788	20.8632	21.0669	9.87294	6.10378
A3/189	2	2014	1	1	light yellow	16306.2	2713.88	382.775	994.258	28.038	17.928	9.014	7.273
A3/189	3	2014	1	1	light yellow	10612.4	2163.64	466.928	829.789	24.586	19.304	8.035	7.937
A3/189	1	2013	2	1	light yellow	30822.1	3002.69	285.102	958.645	9.36721	23.7275	6.47733	4.58396
A3/189	2	2013	2	1	light yellow	33198	2500.99	410.891	1011.88	10.2376	28.6139	7.80198	6.93069
A3/189	3	2013	2	1	light yellow	27459.1	2789.5	372.561	838.435	9.31154	25.3591	6.14165	5.5473
A3/189	1	2014	2	1	light yellow	12703.9	2986.95	313.198	934.948	19.1201	26.2976	8.20564	6.22837
A3/189	2	2014	2	1	light yellow	11593.2	3093.7	210.847	1082.81	25.1816	29.1525	7.55448	6.87651
A3/189	3	2014	2	1	light yellow	14323.8	2761.11	354.097	1080.95	25.4195	27.542	9.57552	6.41658
A3/189	1	2013	3	1	light yellow	35039.4	2875.98	260.63	1211.61	18.0118	13.878	6.98819	6.39764
A3/189	2	2013	3	1	light yellow	25246.2	3236.47	326.865	1324.04	16.7723	19.0151	7.41102	6.72843
A3/189	3	2013	3	1	light yellow	28939	2620.72	251.314	1159.15	21.7154	19.9306	5.36292	5.06544
A3/189	1	2014	3	1	light yellow	21458.4	3025.41	358.23	1325.36	19.36	20.33	7.21	5.51
A3/189	2	2014	3	1	light yellow	25368.7	3287	347.655	1205.33	23.55	21.54	6.99	5.99
A3/189	3	2014	3	1	light yellow	29874.1	3478.84	302.14	1204.02	24.88	23.94	7.68	6.11
A3/234	1	2013	1	1	light yellow	23594.9	2496.71	391.038	992	18.0253	27.7468	6.88608	6.17722
A3/234	2	2013	1	1	light yellow	20626.3	2772.07	320.123	1027.72	15.4004	24.4353	6.98152	7.49487
A3/234	3	2013	1	1	light yellow	28431.2	2709.61	273.039	1181.3	16.1039	23.2208	7	9.03896
A3/234	1	2014	1	1	light yellow	13228.4	2782.36	250.691	846.161	29.7282	10.2861	5.14	6.81784
A3/234	2	2014	1	1	light yellow	14137.1	2274.87	299.66	865.921	30.044	11.57	6.82	8.653
A3/234	3	2014	1	1	light yellow	19874.2	2587.22	258.33	902.41	25.17	12	7.87	7.28
A3/234	1	2013	2	1	light yellow	32050.3	4056.28	394.07	1127.64	11.3568	15.7789	7.9397	5.82915
A3/234	2	2013	2	1	light yellow	38809.4	3659.15	320.691	961.114	14.6904	13.5382	7.16	5.18483
A3/234	3	2013	2	1	light yellow	35874.1	3875.24	350.21	1087.32	12.09	18.57	8.65	6.08
A3/234	1	2014	2	1	light yellow	16647.6	3152.82	472.779	870.296	34.575	24.4508	10.6017	6.02865
A3/234	2	2014	2	1	light yellow	12471.9	2823.3	435.242	967.499	34.1654	28.3896	7.04846	7.34214
A3/234	3	2014	2	1	light yellow	15656.9	3034.31	430.098	779.314	30.3137	31.5882	9.60784	5.68627
A3/234	1	2013	3	1	light yellow	20392.4	3296.78	153.219	1215.09	20.9256	18.9135	7.54527	8.14889
A3/234	2	2013	3	1	light yellow	24393.9	3764.65	111.515	1088.89	20	12.1212	7.37374	6.56566
A3/234	3	2013	3	1	light yellow	22547.4	3587.18	135.22	1358.02	18.27	15.57	8.02	7.27
A3/234	1	2014	3	1	light yellow	21926.3	5231.45	277.002	1734.64	41.2776	48.4521	11.3022	10.7125
A3/234	2	2014	3	1	light yellow	22869.6	5059.9	320.29	1725.6	44.5411	48.1159	10.7246	10.628
A3/234	3	2014	3	1	light yellow	23184.2	5103.42	363.155	1700.82	42.1356	47.5277	10.7744	10.582
A3/275	1	2013	1	1	light yellow	42820.9	3613.39	211.872	967.428	21.106	46.6768	9.13242	4.46474
A3/275	2	2013	1	1	light yellow	38635.7	3591.73	283.307	902.532	20.0517	40.5168	8.68217	5.5814
A3/275	3	2013	1	1	light yellow	40100.5	3183.92	199.397	887.94	20.9045	44.2211	8.84422	5.42714
A3/275	1	2014	1	1	light yellow	13994.3	3219.73	411.63	1398	33.27	17.255	10.296	7.054
A3/275	2	2014	1	1	light yellow	14846.7	3691.39	430.168	1261.13	34.125	21.365	10.56	8.781
A3/275	3	2014	1	1	light yellow	9827.04	3074.55	457.256	1007.95	30.9563	14.4135	9.25	7.95229
A3/275	1	2013	2	1	light yellow	20243.2	2721.01	281.323	1007.98	10.4786	26.2646	8.56031	6.51751
A3/275	2	2013	2	1	light yellow	22432	2216.66	288.087	989.619	8.3045	22.0613	7.93	5.14088
A3/275	3	2013	2	1	light yellow	27787.6	2565.39	154.179	908.85	11.9646	18.0924	6.98132	5.11308
A3/275	1	2014	2	1	light yellow	11947.3	2675.45	232.113	1358.71	29.3821	30.1611	7.61347	9.15129
A3/275	2	2014	2	1	light yellow	12978.7	2793.42	209.865	1323.02	30.8685	26.8279	7.54352	8.9942
A3/275	3	2014	2	1	light yellow	13915.1	3091.23	256.08	1236.05	34.7163	25.5603	8.58369	9.91893
A3/275	1	2013	3	1	light yellow	22055.4	3646.27	448.948	1263.86	13.3652	26.673	6.30975	6.69216
A3/275	2	2013	3	1	light yellow	16793.5	3658.64	385.481	1322.1	15.9846	24.3621	6.25903	6.6442
A3/275	3	2013	3	1	light yellow	24332.3	3503.46	306.726	1395.65	16.7161	22.453	7.11	7.91296
A3/275	1	2014	3	1	light yellow	19884.9	3887.77	320.144	1473.38	38.8489	29.7362	9.78417	8.05755
A3/275	2	2014	3	1	light yellow	20471.2	3802.88	323.462	1444.23	36.1538	26.25	10.3846	8.26923
A3/275	3	2014	3	1	light yellow	20019.8	3809.52	329.464	1434.52	30.631	32.6389	9.4246	8.03571
A3/321	1	2013	1	1	light yellow	31796.6	3004.65	355.808	1076.92	17.7594	22.4058	9.49923	6.64636
A3/321	2	2013	1	1	light yellow	37469.3	2802.46	211.373	1162.91	20.6967	23.1557	9.73361	6.25
A3/321	3	2013	1	1	light yellow	33032.5	2671.4	294.219	906.795	17.14	25.57	8.21501	6.28803
A3/321	1	2014	1	1	light yellow	10154	2800.77	379.307	1331.09	26.4293	35.6112	8.82	8.85467
A3/321	2	2014	1	1	light yellow	11252.4	2929.55	381.311	1101.76	20.7436	32.0352	6.16438	7.4364
A3/321	3	2014	1	1	light yellow	10923.9	2352.32	241.838	1237.48	16.9459	28.9038	7.93	6.69124
A3/321	1	2013	2	1	light yellow	45746.5	3278.6	355.003	1227.3	26.2699	29.3484	10.6721	6.72242
A3/321	2	2013	2	1	light yellow	40788.5	3438.47	262.18	1299.85	29.332	24.2089	9.53	6.73029
A3/321	3	2013	2	1	light yellow	43305.6	3304.65	395.892	1304.65	28.0196	22.5917	8.99756	6.94377
A3/321	1	2014	2	1	light yellow	14691.5	3244.38	297.944	1680.3	40.2678	19.7991	11.6691	6.98231
A3/321	2	2014	2	1	light yellow	12369.7	3040.12	290.167	1516.22	42.1829	21.5339	9.53786	8.16126
A3/321	3	2014	2	1	light yellow	17140	3538.66	276.331	1778.11	37.2781	24.6154	10.39	7.2288
A3/321	1	2013	3	1	light yellow	20269.9	3555.62	210.445	1682.16	19.4928	13.2934	8.7	7.09645
A3/321	2	2013	3	1	light yellow	18082.2	3235.81	233.855	1576.13	21.5264	16.6341	9.68689	6.75147
A3/321	3	2013	3	1	light yellow	25300.4	3742.55	283.291	1785.97	24.0283	20.7254	7.26906	8.59112
A3/321	1	2014	3	1	light yellow	11001.4	3345.86	243.699	1477.14	41.1116	27.6703	8.23	9.12075
A3/321	2	2014	3	1	light yellow	16612.4	3688.04	388.9	1610.53	33.7799	30.7656	9.1866	9.2823
A3/321	3	2014	3	1	light yellow	15202.7	3780.17	339.179	1573.03	34.7826	32.0469	7.53	9.47728
A3/337	1	2013	1	1	light yellow	24412.8	3037.59	332.973	1017.2	22.9975	38.231	9.82801	6.68305
A3/337	2	2013	1	1	light yellow	20893.5	3454.1	401.375	978.4	19.0476	26.8041	9.81836	5.00736
A3/337	3	2013	1	1	light yellow	26547.3	2953.05	326.77	1005.27	21.08	32.54	10.2	5.87
A3/337	1	2014	1	1	light yellow	13316.9	2667.32	605.323	903.992	50.37	22.178	10.054	7.886
A3/337	2	2014	1	1	light yellow	16155.3	3057.53	545.446	1050.24	42.953	20.614	11.505	9.684
A3/337	3	2014	1	1	light yellow	15429.4	3596.25	527.542	996.051	42.0563	23.6525	9.84	8.71273
A3/337	1	2013	2	1	light yellow	43883.8	5806.32	561.978	1375.13	27.0234	37.5025	11.4169	8.56269
A3/337	2	2013	2	1	light yellow	40685.9	5568.19	649.304	1281.31	23.1213	31.6103	10.67	8.2505
A3/337	3	2013	2	1	light yellow	43967.4	5355.04	503.459	1578.84	25.6205	33.469	12.9196	8.91963
A3/337	1	2014	2	1	light yellow	13830.3	3011.28	205.002	927.023	46.6945	27.4644	9.90682	6.08141
A3/337	2	2014	2	1	light yellow	11805.5	3350.99	299.856	996.63	48.6278	28.8878	8.9	7.97015
A3/337	3	2014	2	1	light yellow	14308.3	3021.74	225.889	1006.52	40.4862	25.6917	9.78261	8.59684
A3/337	1	2013	3	1	light yellow	18407.7	3076.74	362.158	1294.96	17.6499	15.9233	7.96163	7.67386
A3/337	2	2013	3	1	light yellow	25930.5	3425.61	316.589	1143.6	19.6993	19.4785	6.53188	5.18403
A3/337	3	2013	3	1	light yellow	23798.3	3584.15	426.3	1242.41	23.0865	17.895	7.41122	6.83788
A3/337	1	2014	3	1	light yellow	21379.3	4333.17	501.797	1411.36	41.865	29.2375	10.72	8.83924
A3/337	2	2014	3	1	light yellow	20850.2	4296.62	485.99	1404.83	41.3527	31.4976	9.46	8.98551
A3/337	3	2014	3	1	light yellow	19912.3	4017.54	496.784	1327.49	42.7875	28.0702	11.6959	8.2846
T4/4	1	2013	1	1	light yellow	26175	2408.95	331.526	1007.73	16.6836	34.6897	8.34181	5.1882
T4/4	2	2013	1	1	light yellow	22716.3	2589.41	232.617	926.481	14.473	26.9119	7.2365	5.8731
T4/4	3	2013	1	1	light yellow	22817.3	2698.66	339.319	1011.35	18.807	29.8246	8.97833	5.15996
T4/4	1	2014	1	1	light yellow	25874.2	2856.12	454.2	1147.94	20.21	25.87	6.99	6.25
T4/4	2	2014	1	1	light yellow	28745.3	3025.88	409.745	1089.32	21.88	31.25	7.25	6.95
T4/4	3	2014	1	1	light yellow	30214	3247	389.248	1254.87	24.77	28.24	8.06	5.99
T4/4	1	2013	2	1	light yellow	23238.9	4253.04	166.093	1344.13	14.1741	32.004	8.70445	5.97166
T4/4	2	2013	2	1	light yellow	31266.8	3856.18	190.611	1201.19	13.3135	26.7263	8.54446	5.56384
T4/4	3	2013	2	1	light yellow	20525	3440.32	127.241	1158.94	13.472	28.2407	8.66	5.95295
T4/4	1	2014	2	1	light yellow	15123.1	2693.38	292.033	1035.25	25.7001	20.2801	8.30517	6.56688
T4/4	2	2014	2	1	light yellow	11335.9	2392.18	234.16	979.008	25.2863	16.0305	7.34733	6.39313
T4/4	3	2014	2	1	light yellow	13297.1	2721.7	212.259	1039.05	22.3895	19.476	7.217	5.83292
T4/4	1	2013	3	1	light yellow	22981.2	2946.65	386.402	1220.71	16.318	17.9916	7.00837	5.96234
T4/4	2	2013	3	1	light yellow	29734.7	3084.69	386.735	1022.45	21.6327	17.9592	7.2449	4.89796
T4/4	3	2013	3	1	light yellow	21998	2864.49	317.112	1170.92	20.4748	16.815	6.64	4.54995
T4/4	1	2014	3	1	light yellow	15872.7	3445.52	483.028	1518.8	46.2874	38.8621	9.13	9.31823
T4/4	2	2014	3	1	light yellow	16492.1	3389.33	569.269	1495.06	44.5652	37.9447	8.10277	9.48617
T4/4	3	2014	3	1	light yellow	16188.6	3280.51	368.012	1428.29	39.8493	33.8503	8.26446	9.04229
T6/3	1	2013	1	1	light yellow	32456	3912.95	231.606	840	20.6218	39.8446	9.11917	6.73575
T6/3	2	2013	1	1	light yellow	34795.2	3441.56	225.774	823.077	21.7782	46.8432	8.29171	6.59341
T6/3	3	2013	1	1	light yellow	38946.3	3790.82	291.721	977.421	19.8695	37.5966	9.13196	6.82388
T6/3	1	2014	1	1	light yellow	11752.2	3008.71	287.899	875.992	39.787	13.485	4.77541	7.1636
T6/3	2	2014	1	1	light yellow	8437.59	2943.31	265.341	821.979	34.9727	11.3923	5.29836	6.58031
T6/3	3	2014	1	1	light yellow	9456.9	2603.45	377.299	822.318	31.9349	14.6552	6.89655	6.70498
T6/3	1	2013	2	1	light yellow	21515.9	3022.9	218.819	1039	28.0188	13.3821	7.63199	5.95923
T6/3	2	2013	2	1	light yellow	35251.4	2395.02	231.48	1190.36	20.0104	20.0207	8.26439	7.05029
T6/3	3	2013	2	1	light yellow	30807.6	2903.19	177.88	975.075	23.5593	18.4447	7.27817	6.58026
T6/3	1	2014	2	1	light yellow	9085.38	2618.25	313.15	1058.88	58.9794	31.3052	7.0844	7.85083
T6/3	2	2014	2	1	light yellow	12417.4	2522.74	278.506	991.862	41.6467	26.5629	8.52082	6.98899
T6/3	3	2014	2	1	light yellow	10820.2	2284.58	284.585	925.889	50.2767	24.5059	9.28854	7.31225
T6/3	1	2013	3	1	light yellow	18071.1	3031.47	225.787	1438.58	25.8883	24.1624	5.48223	8.22335
T6/3	2	2013	3	1	light yellow	20147.2	2857.14	325.21	1325.74	20.25	22.57	6.25	8.99
T6/3	3	2013	3	1	light yellow	22574	2647.1	298.25	1247.35	22.22	20.85	7.65	9.15
T6/3	1	2014	3	1	light yellow	14455.9	2324.96	366.027	1097.98	30.0345	20.6795	5.90842	6.59774
T6/3	2	2014	3	1	light yellow	14197.9	2946.21	308.838	1006.72	36.3112	22.2863	7.4928	5.76369
T6/3	3	2014	3	1	light yellow	13808.6	2635.41	255.981	1187.56	24.0191	19.0431	5.74163	7.17703
T6/17	1	2013	1	1	light yellow	34943.6	2832.82	218.051	1078.97	20.8205	25.8718	8	7.38462
T6/17	2	2013	1	1	light yellow	36224.9	2551.83	219.34	1077.88	21.3512	23.1377	7.01392	7.73595
T6/17	3	2013	1	1	light yellow	31965.1	2125.19	256.309	988.329	19.5511	30.3242	7.18204	6.08479
T6/17	1	2014	1	1	light yellow	13636.8	3108.17	112.873	1182.57	8.09104	34.7528	4.81057	8.41899
T6/17	2	2014	1	1	light yellow	12294.3	3328.17	137.561	1011.62	11.5198	32.8074	4.93708	8.03485
T6/17	3	2014	1	1	light yellow	12528.3	3631.35	130.803	977.378	9.36422	33.9428	4.73139	7.89995
T6/17	1	2013	2	1	light yellow	30685.3	4653.47	234.556	1386.1	11.0039	18.6293	6.71429	7.23938
T6/17	2	2013	2	1	light yellow	32754.1	4562.1	268.827	1149.73	17.0913	26.8189	7.85469	7.1674
T6/17	3	2013	2	1	light yellow	38858	4522.63	293.724	1185.19	15.7078	17.0782	5.04115	7.71605
T6/17	1	2014	2	1	light yellow	16699.5	3614.78	389.557	1342.86	40.8374	23.1527	8.867	9.16256
T6/17	2	2014	2	1	light yellow	13945.3	3385.74	353.125	1357.42	47.2266	24.5117	10.6445	9.375
T6/17	3	2014	2	1	light yellow	9865.15	3035.2	370.848	1345.56	44.7248	30.2092	9.2469	8.52752
T6/17	1	2013	3	1	light yellow	23852.2	3711.33	342.759	1255.67	23.2512	35.1724	8.30049	8.76847
T6/17	2	2013	3	1	light yellow	22538.9	3364.78	370.497	1391.87	22.8801	28.1987	9.60361	8.2288
T6/17	3	2013	3	1	light yellow	20020.6	3602.68	321.362	1489.16	16.4087	33.0671	7.32714	8.46233
T6/17	1	2014	3	1	light yellow	16403.2	3695.65	406.324	1415.02	31.917	27.9644	8.00395	7.00395
T6/17	2	2014	3	1	light yellow	14735.3	3531.71	377.396	1443.97	32.742	26.9909	6.96233	6.19933
T6/17	3	2014	3	1	light yellow	16084.8	3599.61	495.661	1499.01	39.3491	31.1637	7.00197	6.1144
A6/71	1	2013	1	1	light yellow	31851.1	2830.56	313.222	1048.97	13.6141	24.7796	6.17042	5.28893
A6/71	2	2013	1	1	light yellow	29362.2	2334.33	278.525	1087.19	8.86896	29.4968	4.98256	4.98256
A6/71	3	2013	1	1	light yellow	31853	2805.64	249.043	960.826	10.1712	23.7664	5.33031	5.23666
A6/71	1	2014	1	1	light yellow	10663.7	3157.84	281.863	864.51	23.1373	12.6667	2.05882	5.60784
A6/71	2	2014	1	1	light yellow	12263.7	3111.97	232.283	707.901	20.9404	9.5618	4.55114	6.10761
A6/71	3	2014	1	1	light yellow	15190.1	3214.82	386.173	917.037	23.481	16.494	3.284	7.198
A6/71	1	2013	2	1	light yellow	36960.4	3002.97	402.277	1386.14	7.22772	24.5545	6.93069	5.14851
A6/71	2	2013	2	1	light yellow	34326.5	2992.86	389.898	1224.49	10.5102	22.551	8.36735	6.32653
A6/71	3	2013	2	1	light yellow	39370.7	2732.55	322.812	1311.7	13.2743	20.354	9.53786	5.60472
A6/71	1	2014	2	1	light yellow	13375.8	2905.44	251.935	962.763	44.684	19.2063	7.25135	6.76139
A6/71	2	2014	2	1	light yellow	13203.1	2629.88	200.195	1030.27	42.9102	29.0039	7.32422	7.03125
A6/71	3	2014	2	1	light yellow	15878	3124.25	214.36	1025.32	40.27	25.87	8.014	7.55
A6/71	1	2013	3	1	light yellow	19124.1	2988.81	361.314	1592.21	17.8102	23.5523	9.24574	6.02433
A6/71	2	2013	3	1	light yellow	22732.1	3412.74	395.236	1446.77	17.404	20.6125	8.896	5.54205
A6/71	3	2013	3	1	light yellow	23587.1	3214.54	308.14	1325.21	17.77	26.58	7.578	7.84
A6/71	1	2014	3	1	light yellow	18574.2	2854.27	354.12	1254.25	21.54	28.68	6.66	7.55
A6/71	2	2014	3	1	light yellow	20514	3014.99	389.33	1123.07	20.8	30.25	8.88	6.24
A6/71	3	2014	3	1	light yellow	17842.3	3147.71	298.874	1036.85	23.47	33.64	7.274	6.98
A6/103	1	2013	1	1	light yellow	26369	3826.69	315.898	957.507	16.9774	21.7861	6.86948	5.88813
A6/103	2	2013	1	1	light yellow	30559.5	4013.22	271.007	903.052	19.8566	27.8128	6.40895	5.90031
A6/103	3	2013	1	1	light yellow	29921	3597.53	370.432	870.617	14.8148	21.7284	5.23457	5.53086
A6/103	1	2014	1	1	light yellow	10555	3136.32	266.212	760.078	19.114	11.587	7.887	6.719
A6/103	2	2014	1	1	light yellow	11304.8	2831.01	307.944	680.886	13.6736	10.0963	6.63698	7.81464
A6/103	3	2014	1	1	light yellow	11474.9	3494.59	390.855	973.746	20.8456	14.9459	7.9646	8.16126
A6/103	1	2013	2	1	light yellow	32864.3	2974.05	259.082	1329.34	12.7745	20.7585	9.98004	6.18762
A6/103	2	2013	2	1	light yellow	28746.3	3202.74	309.696	1104.8	11.9491	10.382	8.97453	5.28893
A6/103	3	2013	2	1	light yellow	30587.9	3147.27	286.33	1258.31	10.88	15.25	7.85	5.87
A6/103	1	2014	2	1	light yellow	13582.5	2346.6	336.99	1149.51	45.3398	29.4175	7.37864	6.21359
A6/103	2	2014	2	1	light yellow	9510.36	2492.53	378.12	914.699	40.8675	20.7229	6.68675	5.78313
A6/103	3	2014	2	1	light yellow	12086.8	2552.54	410.849	1107.05	48.15	24.371	8.38678	6.90676
A6/103	1	2013	3	1	light yellow	17566.8	3091.99	296.696	1250.45	17.8042	20.8042	7.81405	6.53907
A6/103	2	2013	3	1	light yellow	20815.3	3265.23	260.815	1320.86	15.6355	25.6115	6.71463	7.57794
A6/103	3	2013	3	1	light yellow	23007.9	3580.05	204.042	1442.52	14.4698	27.2362	7.45407	7.87402
A6/103	1	2014	3	1	light yellow	19319.3	4199.42	311.697	1390.6	44.1035	33.3653	10.8341	5.35475
A6/103	2	2014	3	1	light yellow	22776.7	3990.46	325.382	1205.15	33.9504	31.1069	9.05725	4.29389
A6/103	3	2014	3	1	light yellow	21941.5	4245.85	351.024	1154.15	37.6585	31.2195	8.87805	6.04878
A6/119	1	2013	1	1	light yellow	22756.5	2227.67	355.641	934.354	21.2353	22.8188	10.7198	5.37162
A6/119	2	2013	1	1	light yellow	20189.9	2977.51	345.927	844.278	23.0885	25.6872	9.996	5.5972
A6/119	3	2013	1	1	light yellow	22059.1	2571.02	404.705	794.852	17.2545	26.9781	11.0582	5.33842
A6/119	1	2014	1	1	light yellow	15570.9	2550.47	255.957	943.45	29.8122	20.3589	9.39199	7.90905
A6/119	2	2014	1	1	light yellow	17787	2330.12	233.253	846.988	23.6747	16.5783	9.56627	6.59036
A6/119	3	2014	1	1	light yellow	15624.7	2590.18	250.267	988.819	27.03	22.056	10.265	8.556
A6/119	1	2013	2	1	light yellow	23493	3162.29	259.66	973.416	14.1216	39.3766	7.31582	4.63679
A6/119	2	2013	2	1	light yellow	27392	2797.81	204.719	967.71	16.0606	31.7586	6.06061	4.86836
A6/119	3	2013	2	1	light yellow	32855.1	2698.39	269.302	1037.24	18.448	45.1928	8.3226	4.80869
A6/119	1	2014	2	1	light yellow	10183	2614.64	196.898	848.555	42.1002	31.8882	7.03276	7.03276
A6/119	2	2014	2	1	light yellow	12061.1	2822.49	256.312	920.71	49.1124	33.2347	7.10059	7.00197
A6/119	3	2014	2	1	light yellow	15478.5	3025.87	234.88	1008.31	44.27	35.25	8.21	7.2547
A6/119	1	2013	3	1	light yellow	20455	3077.15	305.274	1526.37	21.303	22.1303	5.72285	7.65253
A6/119	2	2013	3	1	light yellow	21094.5	3309.45	340.1	1655.72	22.8856	26.5672	6.56716	7.9602
A6/119	3	2013	3	1	light yellow	17297.3	2720.39	344.275	1428.5	20.1474	16.9042	7.86241	6.28993
A6/119	1	2014	3	1	light yellow	18781.6	3436.35	440.911	1184.74	40.0198	42.6944	7.92472	6.53789
A6/119	2	2014	3	1	light yellow	18921.9	3467.85	500.465	1192.88	46.8843	33.4322	9.19881	6.92384
A6/119	3	2014	3	1	light yellow	19704.2	3578.24	435.019	1180.34	42.9389	32.0611	9.44656	6.96565
A8/11	1	2013	1	1	light yellow	25797	3290.11	391.594	931.266	11.9938	36.4941	6.2532	5.94567
A8/11	2	2013	1	1	light yellow	21293.3	3128.31	371.894	802.953	18.2281	29.5316	6.92464	4.68432
A8/11	3	2013	1	1	light yellow	19722	3473.63	391.083	780.249	17.2579	31.3519	7.95781	6.42378
A8/11	1	2014	1	1	light yellow	11193.7	3041.26	257.85	954.631	21.2977	16.0475	8.9153	7.92472
A8/11	2	2014	1	1	light yellow	13041.3	2787.4	299.213	1054.92	20.6457	12.8543	9.77165	5.72441
A8/11	3	2014	1	1	light yellow	12084.1	2993.74	290.705	1211.35	25.832	13.894	10.937	6.568
A8/11	1	2013	2	1	light yellow	42894.1	4240.75	230.309	1179.57	19.6655	12.9752	10.878	7.50127
A8/11	2	2013	2	1	light yellow	42435.8	4228.49	338.903	1301.46	20.5335	23.4474	9.75038	6.94514
A8/11	3	2013	2	1	light yellow	38746	4425.18	287.36	1247.36	18.74	18.57	8.25	7.58
A8/11	1	2014	2	1	light yellow	12260.9	3045.61	395.194	1347.72	34.4286	23.4429	10.2011	9.61256
A8/11	2	2014	2	1	light yellow	16019.4	3799.52	405.521	1260.29	42.615	25.4722	9.20097	8.81356
A8/11	3	2014	2	1	light yellow	12650.4	3518.65	434.262	1407.26	37.2949	29.7812	8.26554	7.45898
A8/11	1	2013	3	1	light yellow	26788.8	2860.09	300.878	1122.35	18.983	24.3237	7.54311	5.26588
A8/11	2	2013	3	1	light yellow	21616.2	2922.22	316.061	1170.71	17.9798	22.2626	8.48485	5.85859
A8/11	3	2013	3	1	light yellow	27269.1	3290.56	353.07	1318.57	18.2726	19.8702	9.18622	6.58862
A8/11	1	2014	3	1	light yellow	18218.6	3701.49	371.497	1562.83	33.6062	37.7468	7.51083	6.35532
A8/11	2	2014	3	1	light yellow	18181.8	3895.82	390.172	1612.78	31.941	45.7985	7.86241	6.68305
A8/11	3	2014	3	1	light yellow	17575.8	3865.87	420.765	1626.43	35.9662	33.8847	7.84898	6.45802
T9/11	1	2013	1	1	light yellow	25272.9	3676.51	300.951	1183.78	13.1197	29.0586	6.91037	7.51127
T9/11	2	2013	1	1	light yellow	22390.8	3043.69	289.198	985.118	17.9549	23.8118	7.20115	7.39318
T9/11	3	2013	1	1	light yellow	22208.8	3517.07	293.273	901.908	13.5542	22.1888	7.22892	6.82329
T9/11	1	2014	1	1	light yellow	12544.8	3301.02	182.453	1005.33	5.91372	12.5206	3.7809	7.5618
T9/11	2	2014	1	1	light yellow	16061.4	2881.74	196.932	915.487	8.70856	10.7917	5.58337	7.52103
T9/11	3	2014	1	1	light yellow	18752.3	3025.87	203.66	1147.32	12.47	12.54	4.25	7.02
T9/11	1	2013	2	1	light yellow	32897.5	3872.79	391.519	1103.48	12.3221	26.8652	6.76426	6.6633
T9/11	2	2013	2	1	light yellow	37267.1	3785.95	415.671	1245.1	17.5824	28.1558	6.21118	6.30674
T9/11	3	2013	2	1	light yellow	35277.6	3404.7	376.788	1066.53	11.6058	33.7169	6.30315	6.4032
T9/11	1	2014	2	1	light yellow	11567.7	3068.16	365.044	1008.76	47.0302	26.1928	7.98442	6.32911
T9/11	2	2014	2	1	light yellow	13999	3248.67	385.797	1212.8	45.6617	24.0427	7.94959	7.94959
T9/11	3	2014	2	1	light yellow	13519.3	2934.9	410.671	1107.2	44.8899	30.1023	8.90847	5.77582
T9/11	1	2013	3	1	light yellow	18685.3	2991.72	395.445	1395.45	8.79917	25.3623	4.65839	7.24638
T9/11	2	2013	3	1	light yellow	20019.9	3307.2	463.821	1543.42	11.9107	25.2109	5.55831	8.83375
T9/11	3	2013	3	1	light yellow	20228.2	3016.87	509.841	1479.76	8.37302	22.996	7.53968	7.7381
T9/11	1	2014	3	1	light yellow	15229.9	2415.71	382.854	1042.34	43.7739	37.3563	8.48276	6.56705
T9/11	2	2014	3	1	light yellow	12150.5	1949.17	376.735	908.016	36.5591	30.8817	6.69208	5.18084
T9/11	3	2014	3	1	light yellow	13111.1	2181.64	343.768	944.251	41.5459	27.4396	5.12077	5.12077
A12/5	1	2013	1	1	light yellow	16574.3	2232.24	302.166	873.854	15.3149	16.927	6.44836	5.64232
A12/5	2	2013	1	1	light yellow	17260.7	2345.12	336.77	905.547	16.6912	21.7968	6.67649	5.49828
A12/5	3	2013	1	1	light yellow	21864.5	2058.02	397.759	779.114	20.1732	28.8334	6.41875	4.78859
A12/5	1	2014	1	1	light yellow	14724.4	3475.39	383.76	1264.76	37.9921	29.1339	10.6299	8.36614
A12/5	2	2014	1	1	light yellow	13075	2983.82	283.129	861.795	38.8279	21.177	9.84453	7.29671
A12/5	3	2014	1	1	light yellow	14579.9	3209.09	313.971	1054.37	31.1005	25.68	10.9091	6.547
A12/5	1	2013	2	1	light yellow	28161	2645.13	297.416	1050.7	21.8688	35.1889	7.15706	4.47316
A12/5	2	2013	2	1	light yellow	30147.9	1982.66	347.68	987.251	19.4799	27.1566	6.01734	5.30342
A12/5	3	2013	2	1	light yellow	36587.2	2258.27	315.69	1125.85	23.14	32.65	8.36	5.27
A12/5	1	2014	2	1	light yellow	13937.3	2576.41	327.327	1073.17	39.4674	21.6028	5.77402	6.66999
A12/5	2	2014	2	1	light yellow	15170.1	3220.89	439.291	1115.48	40.6325	22.4245	7.37901	6.4207
A12/5	3	2014	2	1	light yellow	18875.2	2857.24	385.22	1025.75	36.58	26.35	6.58	6.24
A12/5	1	2013	3	1	light yellow	37744.1	3376.5	235.196	1185.38	13.8903	25.0392	5.84856	6.28198
A12/5	2	2013	3	1	light yellow	32051.2	2838.87	236.113	1175.45	11.4578	23.2225	7.20716	7.87724
A12/5	3	2013	3	1	light yellow	39109.8	3016.82	215.826	1213.55	16.4194	23.8378	4.9456	5.63798
A12/5	1	2014	3	1	light yellow	25687	2985.24	309.25	1025.32	22.33	28.22	6.74	6.55
A12/5	2	2014	3	1	light yellow	28746	3214.27	368.36	999.34	24.8	25.69	7.24	7.02
A12/5	3	2014	3	1	light yellow	26589.2	3025.41	378.11	1145.87	20.01	31.25	8.64	7.64
AGATA	1	2013	1	1	light yellow	26223	1422.5	340.984	1107.23	23.3049	46.007	6.32848	6.22803
AGATA	2	2013	1	1	light yellow	28339.2	1837.35	336.699	1298.33	18.7496	44.9268	7.57193	6.6633
AGATA	3	2013	1	1	light yellow	20262.7	1710.98	347.241	1255.91	15.6595	42.3857	8.09249	5.25486
AGATA	1	2014	1	1	light yellow	10895.7	3238.98	433.661	1528.54	28.3465	16.3386	9.35039	7.28346
AGATA	2	2014	1	1	light yellow	11443.7	3063.52	487.007	1473.53	24.7353	13.7632	8.90857	7.79596
AGATA	3	2014	1	1	light yellow	15157.3	3401.9	438.592	1520.72	31.353	21.468	9.885	8.286
AGATA	1	2013	2	1	light yellow	31531	3001.64	264.926	1196.11	11.2647	24.4086	6.21659	7.06605
AGATA	2	2013	2	1	light yellow	32743.5	3326.04	318.191	1354.87	13.2604	22.7058	4.77137	6.56064
AGATA	3	2013	2	1	light yellow	26091.5	2811.02	342.62	1244.49	12.7859	25.104	5.40541	6.44491
AGATA	1	2014	2	1	light yellow	14545.5	3824.43	360.269	1548.82	30.6878	20.683	7.69601	7.50361
AGATA	2	2014	2	1	light yellow	16748.5	3065.82	446.071	1432.22	31.1002	28.8802	8.15324	7.85855
AGATA	3	2014	2	1	light yellow	16673	3452.2	403.537	1592.73	38.1453	26.4818	9.80306	7.64818
AGATA	1	2013	3	1	light yellow	22789.1	3519.6	352.754	1493.55	28.5856	28.6476	5.45906	7.54342
AGATA	2	2013	3	1	light yellow	28202.1	3950.44	274.733	1559.77	23.6152	21.2828	7.77454	7.87172
AGATA	3	2013	3	1	light yellow	23113.1	3281.28	249.249	1391.39	23.7237	20.02	6.50651	6.30631
AGATA	1	2014	3	1	light yellow	16322.4	3447.88	318.05	1389.96	48.0695	32.7529	8.49421	7.72201
AGATA	2	2014	3	1	light yellow	24620.7	3752.6	331.532	1299.95	40.4859	35.5974	9.60982	7.23847
AGATA	3	2014	3	1	light yellow	17097.4	3686.88	407.157	1150.1	46.4215	28.33	8.74751	6.66004
HERMES	1	2013	1	1	light yellow	17025.2	3036.54	256.716	782.913	19.9691	45.2187	8.07308	7.91148
HERMES	2	2013	1	1	light yellow	17087.2	3143.59	251.385	925.026	24.1026	40.3077	9.12821	6.35897
HERMES	3	2013	1	1	light yellow	15869	3796.65	318.218	1149.19	24.126	42.836	9.45347	8.27179
HERMES	1	2014	1	1	light yellow	8694.32	1951.61	235.259	777.975	33.284	14.025	7.012	6.617
HERMES	2	2014	1	1	light yellow	7992.3	2748.68	280.164	621.955	26.851	10.881	8.37	7.622
HERMES	3	2014	1	1	light yellow	13454.4	2203.06	256.856	875.06	25.8	19.971	10.702	8.218
HERMES	1	2013	2	1	light yellow	32128.4	3559.81	381.926	979.234	19.4718	17.9182	6.90005	7.35008
HERMES	2	2013	2	1	light yellow	35541.5	3182.13	379.602	1023.12	18.3584	22.0544	8.06217	7.47936
HERMES	3	2013	2	1	light yellow	38593.7	3873.38	412.403	1210.17	23.041	19.5122	7.36897	7.26518
HERMES	1	2014	2	1	light yellow	8142.18	2630.73	362.214	1142.18	29.1031	30.6298	5.05725	6.10687
HERMES	2	2014	2	1	light yellow	10761.7	3318.92	332.875	1506.63	39.2138	29.7789	4.914	7.56757
HERMES	3	2014	2	1	light yellow	12587.3	3058.14	358.21	1347.28	34.37	28.59	6.21	6.57
HERMES	1	2013	3	1	light yellow	21066.4	3339.03	221.529	1304.83	19.0141	20.6237	5.14889	8.2495
HERMES	2	2013	3	1	light yellow	17189.2	3021.82	303.805	1479.45	16.1339	25.3841	4.9721	6.29122
HERMES	3	2013	3	1	light yellow	16513.4	2658.05	270.019	1222.22	11.6858	21.4559	3.35249	6.22605
HERMES	1	2014	3	1	light yellow	11645.3	2767.49	194.089	1116.26	24.1379	20	6.40394	5.3202
HERMES	2	2014	3	1	light yellow	13747.6	3036.61	350.482	1192.68	28.3237	22.158	6.1657	5.97303
HERMES	3	2014	3	1	light yellow	15817.3	3158.24	285.24	1025.82	20.85	25.36	6.54757	6.063
LADY CLAIRE	1	2013	1	1	light yellow	20382.8	2480.08	382.928	981.066	19.2447	30.1092	5.7941	6.4149
LADY CLAIRE	2	2013	1	1	light yellow	20130.4	2913.74	238.215	848.847	18.1545	28.0752	5.31595	6.01805
LADY CLAIRE	3	2013	1	1	light yellow	17569.8	3332.24	222.244	875.355	17.1485	25.8697	5.19353	5.80157
LADY CLAIRE	1	2014	1	1	light yellow	12331.7	2753.17	262.146	1042.93	14.9268	25.2683	7.78049	5.95122
LADY CLAIRE	2	2014	1	1	light yellow	10450.8	2234.61	304.411	885.797	17.271	23.6175	7.77557	4.65342
LADY CLAIRE	3	2014	1	1	light yellow	14361.3	2565.9	350.941	919.389	14.198	20.356	7.837	6.753
LADY CLAIRE	1	2013	2	1	light yellow	35182.8	3517.28	227.441	1261.89	7.41112	19.329	5.20781	6.71007
LADY CLAIRE	2	2013	2	1	light yellow	38403.9	3585.4	294.501	1191.24	12.944	21.3139	6.81265	6.618
LADY CLAIRE	3	2013	2	1	light yellow	33687.2	3025.87	378.69	1025.95	9.24	23.68	7.2147	7.286
LADY CLAIRE	1	2014	2	1	light yellow	10596.3	2509.29	300	1106.55	29.0323	24.0469	9.45161	7.13587
LADY CLAIRE	2	2014	2	1	light yellow	14425.6	3685.89	290.645	1265.68	21.1052	26.1755	10.0824	8.56714
LADY CLAIRE	3	2014	2	1	light yellow	16587.2	3025.47	357.32	1385.27	25.87	28.98	8.24	8.05974
LADY CLAIRE	1	2013	3	1	light yellow	17743.1	2983.38	265.29	1394.46	14.8111	29.7229	5.33249	6.34761
LADY CLAIRE	2	2013	3	1	light yellow	19417.7	3013.13	255.465	1234.8	15.179	25.3699	7.7327	5.6778
LADY CLAIRE	3	2013	3	1	light yellow	20306.5	3301.65	297.381	1558.68	20.1649	28.225	6.78952	7.46848
LADY CLAIRE	1	2014	3	1	light yellow	15031	3666.19	267	1365.76	37.4964	40.7248	8.68193	8.20219
LADY CLAIRE	2	2014	3	1	light yellow	14637.9	3567.39	276.355	1323.74	30.7914	42.3022	7.09832	7.86571
LADY CLAIRE	3	2014	3	1	light yellow	14606.4	3489.8	265.306	1281.83	38.8921	48.2148	7.58017	7.48299
MARABEL	1	2013	1	1	light yellow	19893	1245.5	467.963	1208.56	16.3345	30.0438	5.25036	5.25036
MARABEL	2	2013	1	1	light yellow	21764.1	1189.98	395.094	1273.49	23.5908	36.2923	7.20251	6.41127
MARABEL	3	2013	1	1	light yellow	18668.7	1110.11	365.966	1220.02	20.9129	28.9289	5.10511	4.4044
MARABEL	1	2014	1	1	light yellow	11575.4	3020.36	323.316	1230.25	25.594	25.47	9.373	8.337
MARABEL	2	2014	1	1	light yellow	14227	3244.62	402.838	1152.64	19.2759	28.5225	6.16438	7.33855
MARABEL	3	2014	1	1	light yellow	16826.8	3460.46	355.361	1491.51	21.3392	31.344	8.53954	7.27802
MARABEL	1	2013	2	1	light yellow	24414.4	2454.45	352.252	1246.25	18.3083	18.7287	10.1041	5.7047
MARABEL	2	2013	2	1	light yellow	20147.6	3138.78	261.417	1178.15	18.2677	13.189	9.84252	6.98819
MARABEL	3	2013	2	1	light yellow	26862.2	2866.95	436.249	1322.16	11.4196	16.3436	8.36249	6.17182
MARABEL	1	2014	2	1	light yellow	14702.8	2933.78	471.629	1778.64	38.666	22.233	11.2765	8.60319
MARABEL	2	2014	2	1	light yellow	17299.1	3384.41	403.872	1606	37.6263	20.8132	9.19652	7.45402
MARABEL	3	2014	2	1	light yellow	12222.2	3035.5	405.998	1570.5	36.1849	21.5339	10.0964	6.21141
MARABEL	1	2013	3	1	light yellow	26392.9	3111.23	289.189	1169.44	17.6715	22.6611	11.4345	7.38046
MARABEL	2	2013	3	1	light yellow	24583.3	3856.25	312.25	1254.87	20.84	25.36	9.695	7.25
MARABEL	3	2013	3	1	light yellow	28745.2	3587.27	385.22	1356.09	23.64	21.58	10.255	6.55
MARABEL	1	2014	3	1	light yellow	19874.3	3258.36	387.22	1458.31	31.64	23.65	10.25	6.95
MARABEL	2	2014	3	1	light yellow	20547.2	3024.78	314.22	1325.98	25.31	20.89	9.21	7.2541
MARABEL	3	2014	3	1	light yellow	18574	3589.27	287.28	1253.41	29.99	22.22	9.96	7.02
MARFONA	1	2013	1	1	light yellow	29631.9	2542.94	356.442	1034.76	20.4499	39.8773	7.97546	7.15746
MARFONA	2	2013	1	1	light yellow	24972.2	2499.24	350.935	1118.75	20.5154	34.3608	9.70187	7.17534
MARFONA	3	2013	1	1	light yellow	25338.8	2603.16	360.418	1284.77	21.4977	40.5502	8.69791	7.51299
MARFONA	1	2014	1	1	light yellow	9623.6	3657.73	310.093	1268.65	23.9196	20.6728	5.46075	7.02097
MARFONA	2	2014	1	1	light yellow	15202.3	3727.36	303.854	1418.11	27.168	19.653	7.597	8.478
MARFONA	3	2014	1	1	light yellow	13574	3568.21	287.25	1325.07	21.25	21.87	6.54	7.654
MARFONA	1	2013	2	1	light yellow	23890.5	3713.43	351.741	1144.28	14.5771	12.7363	6.16915	7.56219
MARFONA	2	2013	2	1	light yellow	24214.1	3632.58	217.441	1445.43	14.7258	17.4621	8.56397	8.14621
MARFONA	3	2013	2	1	light yellow	25874.4	3458.32	275.61	1328.41	16.25	21.58	7.124	7.68
MARFONA	1	2014	2	1	light yellow	16312.5	3302.38	253.954	1363.42	33.4789	21.5429	9.02475	9.21883
MARFONA	2	2014	2	1	light yellow	18051.7	3521.07	313.221	1295.23	31.8091	22.4652	10.338	8.84692
MARFONA	3	2014	2	1	light yellow	11728.6	3193.66	257.949	1229.32	34.7796	25.2932	8.93413	7.52848
MARFONA	1	2013	3	1	light yellow	15478.4	3256.25	275.22	1102.41	28.58	24.58	9.25	5.68
MARFONA	2	2013	3	1	light yellow	16574.1	3025.88	352.11	1080.25	30.55	28.36	8.69	6.88
MARFONA	3	2013	3	1	light yellow	18745.2	2963.87	384.22	989.25	31.37	30.22	7.912	6.25
MARFONA	1	2014	3	1	light yellow	16978.3	3449.8	388.386	1384.84	34.4291	31.4961	11.5157	7.77559
MARFONA	2	2014	3	1	light yellow	17272.3	3588.43	372.53	1397.59	38.0723	31.8072	12.0482	7.90361
MARFONA	3	2014	3	1	light yellow	16063.6	3656.06	369.185	1409.54	33.499	31.3121	11.7296	8.15109
A1/58	1	2013	1	4	white	43699.9	2930.83	384.584	1128.47	21.2025	41.4183	7.91367	7.09147
A1/58	2	2013	1	4	white	47620.5	2880.52	378.414	1187.75	20.8675	46.0241	8.73494	7.02811
A1/58	3	2013	1	4	white	44507.2	2661.19	323.614	1376.8	24.846	44.1889	9.03491	7.70021
A1/58	1	2014	1	4	white	13301.1	3204.26	395.16	940.561	21.849	17.812	9.293	7.228
A1/58	2	2014	1	4	white	12838	2772.66	290.54	819.812	18.425	18.816	8.637	6.835
A1/58	3	2014	1	4	white	13840	3026.33	352.807	812.221	22.255	14.009	7.054	5.564
A1/58	1	2013	2	4	white	43551.8	2887.44	349.275	1695.85	27.6138	24.4072	6.003	7.30365
A1/58	2	2013	2	4	white	50805.1	3145.32	389.62	1498.73	24.0759	18.5316	7.49367	6.48101
A1/58	3	2013	2	4	white	33481.9	3361.66	492.746	1792.75	21.8653	22.9534	7.67358	7.9171
A1/58	1	2014	2	4	white	20177.3	5037.81	325.751	1691.78	41.3589	25.2093	10.7031	10.2787
A1/58	2	2014	2	4	white	20748.4	4855.83	441.95	1858.2	40.9207	29.8917	9.7031	12.2787
A1/58	3	2014	2	4	white	13620.1	4707.59	393.523	1467.38	39.7293	22.6728	8.60319	11.2131
A1/58	1	2013	3	4	white	22389.2	4052.99	261.464	1796.72	23.025	37.0906	7.32177	10.1156
A1/58	2	2013	3	4	white	24657.1	4450.36	397.646	2198.57	25.6909	36.0287	8.62129	10.5343
A1/58	3	2013	3	4	white	23341.7	4950.18	389.28	1504.78	28.8223	39.4263	7.24711	9.74383
A1/58	1	2014	3	4	white	23183.6	4907.27	622.18	1855.64	43.021	37.0937	12.6195	12.2371
A1/58	2	2014	3	4	white	24856.9	5124.38	641.658	1955.58	41.1649	39.9803	12.8332	12.9319
A1/58	3	2014	3	4	white	24637.7	5058.94	660.29	1963.29	43.7681	39.3237	12.4638	13.0435
A5/6	1	2013	1	4	white	21811.6	1662.38	442.306	971.076	16.0576	25.9393	9.62	7.20535
A5/6	2	2013	1	4	white	29550	1603	323.8	1175	17.7	28.4	10.1	8.5
A5/6	3	2013	1	4	white	25717.2	1507.75	312.215	1086.67	15.8135	24.6325	8.21085	7.87937
A5/6	1	2014	1	4	white	13805.6	2428.91	316.324	741.886	10.7228	11.5318	3.39	7.45716
A5/6	2	2014	1	4	white	13074.3	2604.18	282.467	873.142	9.61632	11.1656	4.75959	6.50801
A5/6	3	2014	1	4	white	14063.7	2733.59	319.305	956.95	13.328	14.189	5.52	8.977
A5/6	1	2013	2	4	white	33924.9	3188.24	305.984	1375.66	27.8661	14.7059	6.49087	8.41785
A5/6	2	2013	2	4	white	31832	3630.57	295.04	1280.36	32.7935	17.251	8.15	9.0081
A5/6	3	2013	2	4	white	32812.8	3379.38	284.985	1144.14	25.7217	22.4224	7.40741	8.00601
A5/6	1	2014	2	4	white	14078.8	3179.31	415.764	1206.9	45.8128	29.2611	8.51	8.64039
A5/6	2	2014	2	4	white	12182.3	2866.44	387.876	1249.27	47.2357	24.064	6.01358	9.31135
A5/6	3	2014	2	4	white	14284.3	2918.28	385.503	1175.83	44.5716	21.2977	7.62754	7.92472
A5/6	1	2013	3	4	white	19644.5	3359.12	326.503	1433.35	15.6822	29.2734	4.91375	5.43649
A5/6	2	2013	3	4	white	17971.6	3158.01	476.166	1548.68	11.4402	25.9635	5.98377	7.50507
A5/6	3	2013	3	4	white	19021	3072.33	339.461	1567.43	10.5894	23.7762	6.29371	6.89311
A5/6	1	2014	3	4	white	17924.4	3220.47	353.85	1435.68	30.3109	38.5462	8.51267	7.55619
A5/6	2	2014	3	4	white	18211.4	3322.81	315.112	1426.11	36.7288	37.494	8.22573	7.65184
A5/6	3	2014	3	4	white	17501.2	3417.92	413.317	1398.55	32.8329	35.8354	9.63	8.49153
T5/4	1	2013	1	4	white	39183	3131.33	237.022	1132.99	12.9266	22.4405	6.92865	5.96381
T5/4	2	2013	1	4	white	39667	3858.73	280.827	1251.26	15.2371	24.9041	5.04541	6.1554
T5/4	3	2013	1	4	white	44425.2	3086.47	228.789	1252.29	14.1506	25.412	7.8	7.13835
T5/4	1	2014	1	4	white	16583.9	3079.32	408.467	1474.45	21.2165	24.3796	6.68	5.36983
T5/4	2	2014	1	4	white	19338.2	2588.18	357.074	844.283	21.124	29.6899	7.39	4.16667
T5/4	3	2014	1	4	white	12526.6	2846.08	337.173	1050.34	21.3069	32.5073	8.73	5.4211
T5/4	1	2013	2	4	white	33253.4	3070.49	203.128	961.627	25.2346	21.4567	7.19499	4.58811
T5/4	2	2013	2	4	white	35772.8	2820.78	196.827	1066.43	22.0461	28.9969	6.96008	4.80246
T5/4	3	2013	2	4	white	30893.7	2639.03	173.909	880.534	20.8885	28.115	6.06061	4.93066
T5/4	1	2014	2	4	white	12835.2	3351.61	384.661	1221.18	37.2984	30.0841	8.01583	6.13558
T5/4	2	2014	2	4	white	13554.4	2886.4	329.79	1343.73	35.9824	21.648	10.6	6.82594
T5/4	3	2014	2	4	white	15874.3	3147.22	358.24	1199.54	33.12	25.87	9.65	6.08
T5/4	1	2013	3	4	white	20161.5	3703.33	341.473	1282.54	16.7508	22.9062	8.98083	7.76993
T5/4	2	2013	3	4	white	20628.3	3427.74	219.72	1237.31	21.073	15.8531	7.38	7.63654
T5/4	3	2013	3	4	white	26841.3	3861.96	298.539	1337.03	23.9547	18.6398	9.06801	7.37783
T5/4	1	2014	3	4	white	17385.8	3050.05	420.117	1038.87	28.6686	24.8785	8.06608	6.60836
T5/4	2	2014	3	4	white	15135.9	2754.41	409.442	1255.13	25.0777	30.4244	6.29471	8.01144
T5/4	3	2014	3	4	white	15141.6	2753.1	457.427	1302.53	30.6011	29.6076	6.45802	7.65027
T5/32	1	2013	1	4	white	34492.3	4426.67	443.179	1492.21	20.3077	37.9487	10.359	6.66667
T5/32	2	2013	1	4	white	42017.1	4664.83	401.054	1507.28	24.2198	40.9589	9.73407	6.82388
T5/32	3	2013	1	4	white	36582.7	4853.33	327.605	1380.74	23.5062	43.2593	9.4	7.7037
T5/32	1	2014	1	4	white	13586.5	3075	440.962	1175.96	20.8654	14.1346	5.09615	6.34615
T5/32	2	2014	1	4	white	11803.4	3557.74	353.612	1136.12	15.4791	11.9902	5.11057	6.28993
T5/32	3	2014	1	4	white	9317.87	3359.33	361.106	1179.66	21.0267	20.9279	4.95	7.60118
T5/32	1	2013	2	4	white	29381.2	2661.68	215.17	1370.46	16.0679	26.8463	8.28343	6.68663
T5/32	2	2013	2	4	white	29760.2	2913.45	238.79	1404.59	14.9114	31.2826	7.09072	6.67362
T5/32	3	2013	2	4	white	33050.1	2774.91	286.899	1226.1	12.3419	28.6292	5.56399	7.1826
T5/32	1	2014	2	4	white	16302.5	2500.25	359.466	1281.27	40.393	26.3124	12.15	8.20564
T5/32	2	2014	2	4	white	14547.2	2873.26	438.524	1431.72	46.7657	29.9952	10.5414	9.7748
T5/32	3	2014	2	4	white	18890.2	2347.36	322.206	1398.84	42.1867	22.7383	11.87	7.48283
T5/32	1	2013	3	4	white	30566.2	3527.79	332.675	1681.82	22.4416	24.4156	9.55844	7.79221
T5/32	2	2013	3	4	white	34102.4	3314.54	343.973	1849.97	27.6255	18.5235	10.3466	7.13916
T5/32	3	2013	3	4	white	30627.9	3402.41	359.184	1702.77	31.8158	25.7588	10.01	7.95395
T5/32	1	2014	3	4	white	10557.9	2290.18	286.505	929.804	30.9013	21.9361	4.1011	5.05484
T5/32	2	2014	3	4	white	11556.9	2778.43	269.4	887.653	31.8643	18.6432	4.00195	4.97804
T5/32	3	2014	3	4	white	14474.3	2627.38	349.731	1098.29	32.8606	22.4694	4.8	5.50856
A5/70	1	2013	1	4	white	20400.6	2473.45	257.627	1010.79	13.2722	29.7078	7.70416	5.95788
A5/70	2	2013	1	4	white	22575.8	2605.17	285.53	915.067	17.5037	33.4162	8.05569	5.86773
A5/70	3	2013	1	4	white	16637.6	3010.76	304.577	968.529	16.7094	26.448	7.38083	5.40595
A5/70	1	2014	1	4	white	11969.5	2331.9	392.275	889.461	24.13	19.552	8.011	7.63
A5/70	2	2014	1	4	white	14643.2	2574.25	367.742	1073.31	27.761	26.911	10.459	8.557
A5/70	3	2014	1	4	white	13635.9	2701.81	414.641	921.327	30.1947	23.4797	9.93	6.8326
A5/70	1	2013	2	4	white	33980.2	2123.46	397.827	1139.75	18.9877	22.2469	8	5.62963
A5/70	2	2013	2	4	white	34476.6	2580.26	423.131	1158.52	17.9163	26.7139	7.37787	5.48355
A5/70	3	2013	2	4	white	36222.1	2443.73	340.506	1285.08	14.9727	30.1438	7.53594	6.44522
A5/70	1	2014	2	4	white	10494.2	2704.07	235.271	1027.13	40.8915	28.1977	8.81783	8.04264
A5/70	2	2014	2	4	white	10898.4	2532.42	288.574	1123.05	40.4297	17.9688	7.73	8.59375
A5/70	3	2014	2	4	white	11750.9	2954.39	277.783	1102.5	35.0172	23.1486	9.41638	9.22021
A5/70	1	2013	3	4	white	28439.8	3909.06	356.711	1089.65	22.4864	28.524	7.03318	5.34918
A5/70	2	2013	3	4	white	28122.6	3666.34	385.117	1380.35	20.8132	29.1829	5.7393	6.71206
A5/70	3	2013	3	4	white	21589.1	3397.86	317.669	1173.81	22.3732	32.4098	6.06377	5.51385
A5/70	1	2014	3	4	white	20343.2	3954.24	432.412	1296.47	41.001	38.5129	11.6301	8.00763
A5/70	2	2014	3	4	white	19931.7	3922.93	586.439	1349.27	35.6098	36.3902	12.6829	7.80488
A5/70	3	2014	3	4	white	20049.3	4030.56	567.127	1145.87	39.6254	40.6668	13.6028	8.37851
A8/34	1	2013	1	4	white	21873.1	2890.98	305.352	1113.97	13.1913	28.8404	9.21705	6.04559
A8/34	2	2013	1	4	white	21166.7	2318.91	247.059	1077.15	13.5148	31.8765	8.19494	6.31988
A8/34	3	2013	1	4	white	20010.3	2011.32	251.004	1239.32	14.4107	36.5414	10.3963	6.89655
A8/34	1	2014	1	4	white	15683.8	3506.3	321.009	1178.47	29.583	18.914	12.803	6.378
A8/34	2	2014	1	4	white	11652.6	3322.08	294.342	907.097	26.3524	26.2978	10.98	4.56576
A8/34	3	2014	1	4	white	18745.3	3025.87	285.36	1087.32	21.85	22.54	11.25	5.87
A8/34	1	2013	2	4	white	21512.8	3358.55	459.43	1488.61	8.54617	19.1552	7.36739	5.00982
A8/34	2	2013	2	4	white	25509.4	3954.5	477.844	1319.49	7.22057	15.1335	8.50643	6.13254
A8/34	3	2013	2	4	white	20153.8	3822.14	433.573	1547.92	9.06715	19.7847	6.35572	7.38083
A8/34	1	2014	2	4	white	10724.2	3290.17	258.034	1076.26	32.9017	30.2158	6.42686	6.90647
A8/34	2	2014	2	4	white	8368.29	3536.49	206.67	1190.91	31.8995	22.4263	7.82987	6.76655
A8/34	3	2014	2	4	white	10724.2	3290.17	258.034	1076.26	32.9017	30.2158	6.42686	6.90647
A8/34	1	2013	3	4	white	19832.5	3214.66	289.424	1307.85	14.0314	17.6963	5.65445	6.70157
A8/34	2	2013	3	4	white	19950	2945.47	297.849	1260.63	16.3082	20.1101	4.6023	4.70235
A8/34	3	2013	3	4	white	17635.2	2776.45	324.557	1163.67	12.9248	22.1158	4.97846	5.26568
A8/34	1	2014	3	4	white	22057.8	3247.17	299.99	1025.32	15.87	25.87	5.87	5.54
A8/34	2	2014	3	4	white	25874.3	3058.19	315.87	989.32	18.77	28.37	6.25	6.24
A8/34	3	2014	3	4	white	20587.1	3398.05	330.54	1125.74	19.65	30.25	6.66	5.08
A13/1	1	2013	1	4	white	26803.7	3198.38	271.03	954.287	15.8295	21.8163	6.90005	5.27651
A13/1	2	2013	1	4	white	24734.3	2806.69	287.697	863.681	14.5669	22.9331	6.20079	5.90551
A13/1	3	2013	1	4	white	23940.6	2656.09	267.349	859.263	17.912	27.9427	6.96008	5.42477
A13/1	1	2014	1	4	white	13726.1	2135.49	318.115	700.049	11.2911	13.5346	8.35	4.51645
A13/1	2	2014	1	4	white	15280.4	2514.87	318.284	826.329	15.28	12.579	9.459	6.191
A13/1	3	2014	1	4	white	18569.3	2857.24	358.35	924.34	18.25	15.25	7.99	5.25
A13/1	1	2013	2	4	white	18418.2	3420.67	292.188	929.452	14.5609	23.2945	8.9277	6.30762
A13/1	2	2013	2	4	white	22917.5	2928.57	253.36	1254.53	17.2032	20.8249	5.33199	6.03622
A13/1	3	2013	2	4	white	25603.4	3210.91	270.199	1076.6	19.0976	24.9738	7.76495	5.66632
A13/1	1	2014	2	4	white	13578.4	2461.76	177.647	984.314	34.902	15.2941	8.62745	6.86275
A13/1	2	2014	2	4	white	12276.7	2987.24	169.185	813.935	39.8528	17.0756	5.00491	5.00491
A13/1	3	2014	2	4	white	11789.1	2638.74	191.917	1055.69	30.4584	20.4584	6.99852	6.30853
A13/1	1	2013	3	4	white	18460.8	2675.49	295.98	1369.61	12.7451	24.7059	6.62745	6.66667
A13/1	2	2013	3	4	white	23522.5	3097.06	160.274	1437.38	13.4051	19.3738	7.14286	6.45793
A13/1	3	2013	3	4	white	26280.8	2502.88	197.276	1396.54	10.791	20.8958	5.76218	7.33368
A13/1	1	2014	3	4	white	17702.6	2592.95	267.016	1070.54	38.9037	26.7874	6.00763	6.95901
A13/1	2	2014	3	4	white	13216.2	3062.13	340.898	1097.12	32.1132	25.0854	5.56369	6.34456
A13/1	3	2014	3	4	white	14218.4	2688.65	365.849	1123.62	39.1486	26.455	5.77201	6.73401
A13/3	1	2013	1	4	white	20986.5	3481.62	328.046	900.193	14.5068	21.1799	6.96325	6.28627
A13/3	2	2013	1	4	white	24698.3	3043.13	362.809	814.837	20.178	32.7181	7.12166	6.42928
A13/3	3	2013	1	4	white	18857.3	2857.35	298.22	874.25	18.02	27.5843	8.25	5.9965
A13/3	1	2014	1	4	white	17733.8	2830.78	272.093	673.478	37.006	21.376	5.54	6.438
A13/3	2	2014	1	4	white	14016	2902.1	229.67	709.89	31.169	11.988	4.161	8.292
A13/3	3	2014	1	4	white	17887.2	2771.57	250.458	537.928	32.5783	16.7831	3.85542	7.20482
A13/3	1	2013	2	4	white	32610.5	3344.71	240.596	953.135	17.6773	13.258	5.13875	6.47482
A13/3	2	2013	2	4	white	31076.6	3038.11	275.263	1255.88	13.1137	19.4442	7.01052	7.11067
A13/3	3	2013	2	4	white	34583.8	3573.72	254.564	1125.38	11.7352	11.7352	6.11836	6.72016
A13/3	1	2014	2	4	white	14277.3	1806.64	183.496	943.652	37.7344	16.2109	7.91016	4.98047
A13/3	2	2014	2	4	white	16830.7	2336.02	236.024	1030.12	39.4094	17.4606	6.83071	5.15354
A13/3	3	2014	2	4	white	13099.1	2189.36	191.898	940.068	33.5774	13.958	6.14934	5.46608
A13/3	1	2013	3	4	white	25709.8	3038.82	361.341	1252.28	16.7627	17.3913	7.12415	6.80985
A13/3	2	2013	3	4	white	24734.4	3278.27	314.308	1396.11	15.4603	22.93	4.31352	7.68017
A13/3	3	2013	3	4	white	27950.3	2550.53	337.341	1172.55	12.2339	16.2354	5.63825	5.17504
A13/3	1	2014	3	4	white	13642.1	2519.63	356.681	1107.57	34.0569	31.4182	6.17463	5.56054
A13/3	2	2014	3	4	white	11096	2731.04	343.744	1119.3	33.4627	31.5228	6.40155	4.17071
A13/3	3	2014	3	4	white	12325.9	3161.48	310.914	1173.33	32.9877	31.3086	7.01235	4.54321
BB std	1	2013	1	4	white	20872.2	2350.95	377.835	775.68	17.4448	24.2175	6.67009	4.00205
BB std	2	2013	1	4	white	19614.2	2827.03	224.236	524.288	15.9109	17.2967	5.17866	4.97152
BB std	3	2013	1	4	white	18753.8	2585.01	265.552	585.816	19.8278	20.2634	5.77508	4.35664
BB std	1	2014	1	4	white	10495.8	2506.63	253.805	775.258	14.9239	12.273	4.61463	6.08738
BB std	2	2014	1	4	white	13079.9	2714.15	276.805	681.136	18.8739	15.8807	6.3359	7.21848
BB std	3	2014	1	4	white	10491.6	2405.73	188.162	835.895	15.2506	13.7184	5.10024	5.91885
BB std	1	2013	2	4	white	27321.2	2405.84	367.472	812.185	16.3142	10.6747	6.34441	5.74018
BB std	2	2013	2	4	white	35660	2563	283	1026	18.61	18.6	5.6	6.2
BB std	3	2013	2	4	white	33258.2	2856.24	345.77	954.21	12.25	15.68	7.254	6.87
BB std	1	2014	2	4	white	15086.2	2794.06	348.467	1159	30.8429	20.6245	8.14176	7.56705
BB std	2	2014	2	4	white	13371.9	3073.22	295.183	1093.45	26.4933	21.3738	8.3815	8.09249
BB std	3	2014	2	4	white	9029.33	2643.01	262.952	911.144	35.259	17.2043	7.03812	6.96285
BB std	1	2013	3	4	white	25229.7	3482.89	310.655	1232.65	19.8436	24.783	8.60215	5.96285
BB std	2	2013	3	4	white	21049.4	3089.81	366.196	1350.15	17.7598	22.9051	6.86176	6.4672
BB std	3	2013	3	4	white	20132.7	2721.8	330.168	1086.27	18.4788	22.4604	7.96069	5.7172
BB std	1	2014	3	4	white	12603.3	2627.28	259.078	783.573	26.3593	18.3477	6.34006	5.18732
BB std	2	2014	3	4	white	15874.3	2857.24	354.11	874.21	28.36	20.25	5.84	4.95
BB std	3	2014	3	4	white	17845.4	3025.47	387.33	952.31	31.82	21.58	7.25	5.99
T6/28	1	2013	1	1	ligh yellow	39429.5	2708.61	293.361	931.846	16.2863	43.5477	6.95021	6.43154
T6/28	2	2013	1	1	ligh yellow	36104.4	2774.3	197.189	1063.25	19.6787	48.8956	6.92771	6.4257
T6/28	3	2013	1	1	ligh yellow	35756.6	2451.38	249.61	1038.9	19.4488	44.8258	9.8804	7.3843
T6/28	1	2014	1	1	ligh yellow	12876	2062.71	299.853	696.913	11.171	18.7188	9.58795	6.99755
T6/28	2	2014	1	1	ligh yellow	10479.8	2520.15	259.981	938.196	19.77	10.653	8.253	7.965
T6/28	3	2014	1	1	ligh yellow	12125.4	2156.71	308.619	777.473	15.749	23.604	7.933	8.619
T6/28	1	2013	2	1	ligh yellow	37275.1	3052.96	292.134	1328.53	21.1825	32.6735	8.12339	8.32905
T6/28	2	2013	2	1	ligh yellow	31941	2794.1	292.678	1272.73	14.8403	27.027	6.58477	9.97789
T6/28	3	2013	2	1	ligh yellow	40167.8	3461.46	244.573	1215.52	18.956	21.7095	7.27792	10.5926
T6/28	1	2014	2	1	ligh yellow	11841.1	3165.7	232.558	1250	24.4186	36.0465	7.65504	8.04264
T6/28	2	2014	2	1	ligh yellow	12954.7	3065.39	298.043	1210.5	34.5585	23.6754	8.30549	9.26014
T6/28	3	2014	2	1	ligh yellow	15365.2	2874.21	245.87	1325.21	28.61	29.57	7.621	8.67
T6/28	1	2013	3	1	ligh yellow	21254.1	2587.25	258.36	1254.2	17.8	24.57	8.55	8.22
T6/28	2	2013	3	1	ligh yellow	23584	2785.21	325.14	1124.12	19.33	21.58	9.12	7.21
T6/28	3	2013	3	1	ligh yellow	25874.1	2985.14	308.65	1025.31	23.21	27.64	10.21	9.54
T6/28	1	2014	3	1	ligh yellow	19874.3	2536.88	387.25	1025.21	21.08	28.56	7.25	8.22
T6/28	2	2014	3	1	ligh yellow	20587.1	2852.11	357.1	989.24	24.55	30.25	8.88	9.24
T6/28	3	2014	3	1	ligh yellow	17845.2	3024.17	314.07	1024.74	25.33	32.88	9.14	8.99

## Sheet: ANOVA_HID
	Category	LS mean
	2013	315.5
	2014	365.348
	Year\Loc.	1	2	3
	2013	324.754	321.875	299.873
	2014	351.754	329.112	415.178
	Year\Color Code	1	2	3	4
	2013	325.238	337.008	285.759	313.998
	2014	360.101	375.067	354.12	372.102
	Category	LS mean
	1	338.254
	2	325.493
	3	357.525
	Loc.\Year	2013	2014
	1	324.754	351.754
	2	321.875	329.112
	3	299.873	415.178
	Loc.\Color Code	1	2	3	4
	1	346.565	360.059	304.905	341.487
	2	334.926	330.616	322.02	314.411
	3	346.516	377.438	332.893	373.253
	Category	LS mean
	1	342.669
	2	356.038
	3	319.939
	4	343.05
	Color Code\Year	2013	2014
	1	325.238	360.101
	2	337.008	375.067
	3	285.759	354.12
	4	313.998	372.102
	Color Code\Loc.	1	2	3
	1	346.565	334.926	346.516
	2	360.059	330.616	377.438
	3	304.905	322.02	332.893
	4	341.487	314.411	373.253

## Sheet: ANOVA_HID1
	Category	LS mean
	2013	7.79903
	2014	8.34417
	Year\Loc.	1	2	3
	2013	8.21016	7.82008	7.36684
	2014	7.05395	9.01952	8.95904
	Year\Color Code	1	2	3	4
	2013	7.73875	7.6287	8.11128	7.71739
	2014	8.44662	8.45592	8.44706	8.02708
	Category	LS mean
	1	7.63206
	2	8.4198
	3	8.16294
	Loc.\Year	2013	2014
	1	8.21016	7.05395
	2	7.82008	9.01952
	3	7.36684	8.95904
	Loc.\Color Code	1	2	3	4
	1	7.93696	7.70318	7.37289	7.51521
	2	8.44754	8.1937	8.8272	8.21077
	3	7.89356	8.23005	8.63743	7.89073
	Category	LS mean
	1	8.09269
	2	8.04231
	3	8.27917
	4	7.87223
	Color Code\Year	2013	2014
	1	7.73875	8.44662
	2	7.6287	8.45592
	3	8.11128	8.44706
	4	7.71739	8.02708
	Color Code\Loc.	1	2	3
	1	7.93696	8.44754	7.89356
	2	7.70318	8.1937	8.23005
	3	7.37289	8.8272	8.63743
	4	7.51521	8.21077	7.89073

## Sheet: ANOVA_HID2
	Category	LS mean
	2013	19.4537
	2014	34.5442
	Year\Loc.	1	2	3
	2013	19.6629	17.7816	20.9168
	2014	24.0371	41.3747	38.2208
	Year\Color Code	1	2	3	4
	2013	19.524	18.9293	19.8006	19.5611
	2014	34.6305	35.417	36.9471	31.1822
	Category	LS mean
	1	21.85
	2	29.5781
	3	29.5688
	Loc.\Year	2013	2014
	1	19.6629	24.0371
	2	17.7816	41.3747
	3	20.9168	38.2208
	Loc.\Color Code	1	2	3	4
	1	23.6017	22.2369	23.0541	18.5073
	2	27.6713	29.2592	30.5714	30.8105
	3	29.9588	30.0233	31.496	26.797
	Category	LS mean
	1	27.0773
	2	27.1731
	3	28.3738
	4	25.3716
	Color Code\Year	2013	2014
	1	19.524	34.6305
	2	18.9293	35.417
	3	19.8006	36.9471
	4	19.5611	31.1822
	Color Code\Loc.	1	2	3
	1	23.6017	27.6713	29.9588
	2	22.2369	29.2592	30.0233
	3	23.0541	30.5714	31.496
	4	18.5073	30.8105	26.797

## Sheet: ANOVA_HID3
	Category	LS mean
	2013	30211.2
	2014	15420.3
	Year\Loc.	1	2	3
	2013	31172	36141.9	23319.8
	2014	14111.7	14012.2	18137
	Year\Color Code	1	2	3	4
	2013	29432.4	29152.8	32644.8	29614.9
	2014	15284.4	15863.3	15859.8	14673.8
	Category	LS mean
	1	22641.9
	2	25077.1
	3	20728.4
	Loc.\Year	2013	2014
	1	31172	14111.7
	2	36141.9	14012.2
	3	23319.8	18137
	Loc.\Color Code	1	2	3	4
	1	22336.6	20087.7	25751.2	22392
	2	24836.1	25898.4	26196.6	23377.2
	3	19902.5	21538.1	20809.2	20663.7
	Category	LS mean
	1	22358.4
	2	22508
	3	24252.3
	4	22144.3
	Color Code\Year	2013	2014
	1	29432.4	15284.4
	2	29152.8	15863.3
	3	32644.8	15859.8
	4	29614.9	14673.8
	Color Code\Loc.	1	2	3
	1	22336.6	24836.1	19902.5
	2	20087.7	25898.4	21538.1
	3	25751.2	26196.6	20809.2
	4	22392	23377.2	20663.7

## Sheet: ANOVA_HID4
	Category	LS mean
	2013	1220.73
	2014	1188.9
	Year\Loc.	1	2	3
	2013	1068.21	1205.69	1388.27
	2014	977.987	1227.07	1361.64
	Year\Color Code	1	2	3	4
	2013	1159.89	1208.44	1244.53	1270.05
	2014	1171.25	1188.48	1239.14	1156.72
	Category	LS mean
	1	1023.1
	2	1216.38
	3	1374.96
	Loc.\Year	2013	2014
	1	1068.21	977.987
	2	1205.69	1227.07
	3	1388.27	1361.64
	Loc.\Color Code	1	2	3	4
	1	977.308	963.811	1048.75	1102.53
	2	1177.25	1210.07	1267.6	1210.59
	3	1342.15	1421.49	1409.15	1327.04
	Category	LS mean
	1	1165.57
	2	1198.46
	3	1241.83
	4	1213.39
	Color Code\Year	2013	2014
	1	1159.89	1171.25
	2	1208.44	1188.48
	3	1244.53	1239.14
	4	1270.05	1156.72
	Color Code\Loc.	1	2	3
	1	977.308	1177.25	1342.15
	2	963.811	1210.07	1421.49
	3	1048.75	1267.6	1409.15
	4	1102.53	1210.59	1327.04

## Sheet: ANOVA_HID5
	Category	LS mean
	2013	6.75318
	2014	7.73445
	Year\Loc.	1	2	3
	2013	6.32834	6.66035	7.27086
	2014	7.06306	8.09123	8.04907
	Year\Color Code	1	2	3	4
	2013	6.36198	6.67121	7.25171	6.72783
	2014	7.65936	7.7583	8.21192	7.30824
	Category	LS mean
	1	6.6957
	2	7.37579
	3	7.65996
	Loc.\Year	2013	2014
	1	6.32834	7.06306
	2	6.66035	8.09123
	3	7.27086	8.04907
	Loc.\Color Code	1	2	3	4
	1	6.38832	6.54532	7.08145	6.7677
	2	7.1808	7.35123	7.71729	7.25384
	3	7.4629	7.74771	8.39669	7.03256
	Category	LS mean
	1	7.01067
	2	7.21475
	3	7.73181
	4	7.01803
	Color Code\Year	2013	2014
	1	6.36198	7.65936
	2	6.67121	7.7583
	3	7.25171	8.21192
	4	6.72783	7.30824
	Color Code\Loc.	1	2	3
	1	6.38832	7.1808	7.4629
	2	6.54532	7.35123	7.74771
	3	7.08145	7.71729	8.39669
	4	6.7677	7.25384	7.03256

## Sheet: ANOVA_HID6
	Category	LS mean
	2013	3218.37
	2014	3189.56
	Year\Loc.	1	2	3
	2013	2968.24	3285.08	3401.79
	2014	2904.95	3102.85	3560.88
	Year\Color Code	1	2	3	4
	2013	3159.61	3337.77	3239.71	3136.4
	2014	3156.83	3374.81	3274.82	2951.77
	Category	LS mean
	1	2936.59
	2	3193.96
	3	3481.34
	Loc.\Year	2013	2014
	1	2968.24	2904.95
	2	3285.08	3102.85
	3	3401.79	3560.88
	Loc.\Color Code	1	2	3	4
	1	2875.86	3036.01	2886	2948.51
	2	3224.24	3370.82	3327.18	2853.62
	3	3374.57	3662.04	3558.63	3330.12
	Category	LS mean
	1	3158.22
	2	3356.29
	3	3257.27
	4	3044.08
	Color Code\Year	2013	2014
	1	3159.61	3156.83
	2	3337.77	3374.81
	3	3239.71	3274.82
	4	3136.4	2951.77
	Color Code\Loc.	1	2	3
	1	2875.86	3224.24	3374.57
	2	3036.01	3370.82	3662.04
	3	2886	3327.18	3558.63
	4	2948.51	2853.62	3330.12

## Sheet: ANOVA_HID7
	Category	LS mean
	2013	26.3801
	2014	26.1137
	Year\Loc.	1	2	3
	2013	31.089	23.9731	24.0783
	2014	19.6547	26.0758	32.6106
	Year\Color Code	1	2	3	4
	2013	26.2284	24.4824	28.2123	26.5974
	2014	25.813	26.4271	26.7577	25.4569
	Category	LS mean
	1	25.3718
	2	25.0245
	3	28.3444
	Loc.\Year	2013	2014
	1	31.089	19.6547
	2	23.9731	26.0758
	3	24.0783	32.6106
	Loc.\Color Code	1	2	3	4
	1	26.2347	22.1297	27.9592	25.1636
	2	24.5729	24.8303	25.7198	24.9749
	3	27.2544	29.4042	28.7761	27.943
	Category	LS mean
	1	26.0207
	2	25.4548
	3	27.485
	4	26.0271
	Color Code\Year	2013	2014
	1	26.2284	25.813
	2	24.4824	26.4271
	3	28.2123	26.7577
	4	26.5974	25.4569
	Color Code\Loc.	1	2	3
	1	26.2347	24.5729	27.2544
	2	22.1297	24.8303	29.4042
	3	27.9592	25.7198	28.7761
	4	25.1636	24.9749	27.943

## Sheet: ANOVA1_HID
	Category	LS mean
	2013	30211.2
	2014	15420.3
	Year\Loc.	1	2	3
	2013	31172	36141.9	23319.8
	2014	14111.7	14012.2	18137
	Year\Color Code	1	2	3	4
	2013	29432.4	29152.8	32644.8	29614.9
	2014	15284.4	15863.3	15859.8	14673.8
	Category	LS mean
	1	22641.9
	2	25077.1
	3	20728.4
	Loc.\Year	2013	2014
	1	31172	14111.7
	2	36141.9	14012.2
	3	23319.8	18137
	Loc.\Color Code	1	2	3	4
	1	22336.6	20087.7	25751.2	22392
	2	24836.1	25898.4	26196.6	23377.2
	3	19902.5	21538.1	20809.2	20663.7
	Category	LS mean
	1	22358.4
	2	22508
	3	24252.3
	4	22144.3
	Color Code\Year	2013	2014
	1	29432.4	15284.4
	2	29152.8	15863.3
	3	32644.8	15859.8
	4	29614.9	14673.8
	Color Code\Loc.	1	2	3
	1	22336.6	24836.1	19902.5
	2	20087.7	25898.4	21538.1
	3	25751.2	26196.6	20809.2
	4	22392	23377.2	20663.7

[truncated: 30 more sheets: ANOVA1_HID1, ANOVA1_HID2, ANOVA1_HID3, ANOVA1_HID4, ANOVA1_HID5, ANOVA1_HID6, ANOVA1_HID7, ANOVA_HID8, ANOVA_HID9, ANOVA_HID10, ANOVA_HID11, ANOVA_HID12, ANOVA_HID13, ANOVA_HID14, ANOVA_HID15, ANOVA1_HID8, ANOVA1_HID9, ANOVA1_HID10, ANOVA1_HID11, ANOVA1_HID12 …]
